Classification:

Biological Sciences: Neuroscience

Title:

## ***How humans grasp three-dimensional objects***

Authors:

Lina K. Klein <sup>a,†</sup>, Guido Maiello <sup>a,†,\*</sup>, Vivian C. Paulun <sup>a</sup>, Roland W. Fleming <sup>a</sup>

<sup>a</sup> Department of Experimental Psychology, Justus-Liebig University Giessen, Giessen 35394, Germany

\* Corresponding Author:

Guido Maiello

Department of Experimental Psychology, Justus-Liebig University Giessen, Otto-Behaghel-Str.10F, Giessen 35394, Germany

Email: [guido\\_maiello@yahoo.it](mailto:guido_maiello@yahoo.it)

† joint first authors; these authors contributed equally to this work

Keywords:

Grasping | Visual Grasp Selection | Precision Grip | Shape | Material

Author Contributions:

GM, LKK, VCP and RWF conceived and designed the study. LKK collected the data. LKK and GM analyzed the data. GM developed the computational model of grasp selection. All authors wrote the manuscript.

## 1 **Abstract**

2 We rarely experience difficulty picking up objects, yet of all potential grasp points on an object's  
3 surface, only a small proportion yield stable, comfortable grasps. Here, we present extensive  
4 behavioral data alongside a computational model that correctly predicts human precision  
5 grasping of unfamiliar 3D objects. We tracked participants' forefinger and thumb as they picked  
6 up objects of 10 wood and brass cubes configured to tease apart effects of shape, weight,  
7 orientation, and mass distribution. Grasps were highly systematic and consistent across  
8 repetitions and participants. The model combines five cost functions related to force closure,  
9 torque, natural grasp axis, grasp aperture, and visibility. Even without free parameters, we find  
10 that the model predicts human grasps with striking fidelity: indeed, it predicts individual grasps  
11 almost as well as different individuals predict one another's. Adding fittable weights to the model  
12 reveals the relative importance of the different constraints: the combination of force closure,  
13 hand posture, and grasp size explains most of human grasping behavior, while our participants  
14 cared surprisingly little about minimizing torque and optimizing object visibility. Together, these  
15 findings provide a unified account of how we derive effective grasps from objects' 3D shape and  
16 material properties to interact with them successfully.

17

## 18 **Significance Statement**

19 Working out how we pick up and interact with objects effectively is one of the most important  
20 challenges in behavioral science. Of all the potential contact points on an object's surface, only  
21 a small proportion yield effective grasps. Despite this, we rarely experience any difficulty  
22 choosing where and how to pick objects up. Here, we present a computational model that  
23 unifies the varied and fragmented literature on human grasp selection. We find that the model  
24 correctly predicts human grasps across a wide variety of conditions, taking into account the  
25 object's 3D shape, material properties and orientation.

26

## 27 Introduction

28 In everyday life, we effortlessly grasp and pick up objects without much thought.  
29 However, this ease belies its computational complexity. Even state of the art robotic AIs fail to  
30 grip objects nearly 20% of the time(1). To pick something up, our brains must work out which  
31 locations on the object will lead to stable, comfortable grasps, so we can perform desired  
32 actions (Figure 1a). Most potential grasps would actually be unsuccessful, e.g., requiring thumb  
33 and forefinger to cross, or failing to exert useful forces (Figure 1b). Even many possible grasps  
34 would be unstable, e.g., grasping an object too far from its center, so that it rotates once we try  
35 to lift it (Figure 1c). Somehow, the brain must infer which, of all potential grasps, would actually  
36 succeed. Despite this, we rarely drop objects or find ourselves unable to complete actions  
37 because we are holding them inappropriately. How does the brain select stable, comfortable  
38 grasps onto arbitrary 3D objects, particularly objects we have never seen before?

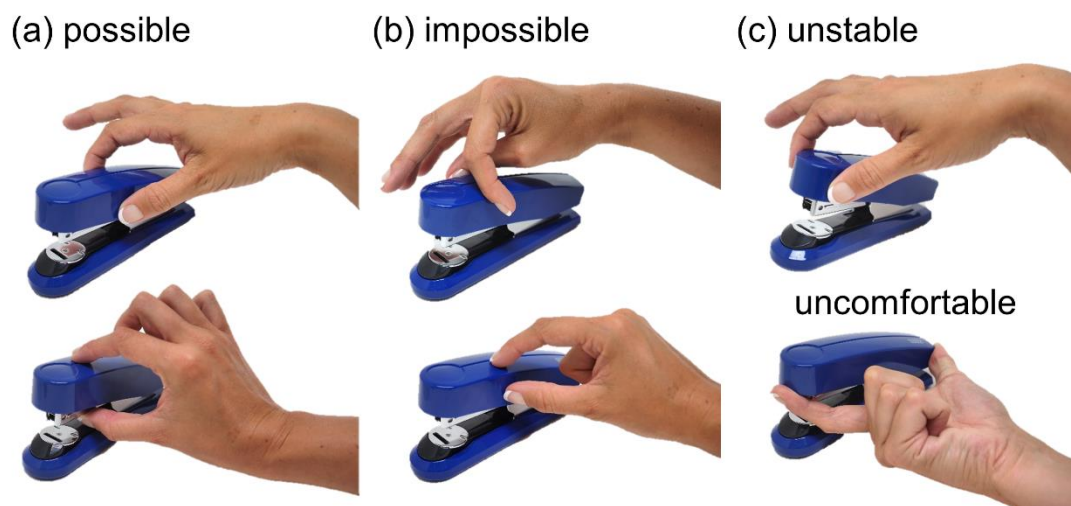

39  
40 **Figure 1.** The computational complexity of grasp selection. (a) Possible (b) Impossible (c)  
41 Possible but uncomfortable or unstable grasps.

42  
43 Despite the extensive literature describing human grasping patterns and movement  
44 kinematics(2–11), little is understood about the computational basis of human grasp selection.

45 Few authors have attempted to study and model how humans select grasps (e.g. (12, 13)), and  
46 even then, only for 2D shapes. This is because, even for two-digit precision grip, many factors  
47 influence how we grasp objects. Object shape must be considered, since the surface normals at  
48 thumb and index finger contact locations must be approximately aligned (a concept known as  
49 force closure(14)), otherwise the object will slip through our fingertips (Figure 1b, bottom). The  
50 object's mass and mass distribution must be evaluated, since for grips with high torques (i.e. far  
51 from the object's center of mass, or CoM(15–19)) the object will tend to rotate under gravity and  
52 potentially slip out of our grasp (Figure 1c, top). The orientation(16, 20–22) and size(23) of each  
53 grasp must be considered, since our arm and hand can move and apply forces only in specific  
54 ways, and grasps that do not conform to the natural configuration of our hand in 3D space might  
55 be impossible (Figure 1b, top), or uncomfortable (Figure 1c, bottom). The hand's positioning  
56 may also determine an object's visibility(9, 24–27).

57 Most previous research on visually guided grasping did not assess the relative  
58 importance of these factors, nor how they interact. Here we sought to unify these varied and  
59 fragmented findings into a single theoretical and computational framework. We therefore  
60 constructed a rich dataset in which we could tease apart how an object's 3D shape, mass, mass  
61 distribution, and orientation influence grasp selection. We devised a set of objects made of  
62 wood and brass cubes in various 3D configurations (Figure 2), and asked participants to pick  
63 them up with a precision grip, move them a short distance and place them at a target location,  
64 while we tracked their thumb and forefinger. By varying the spatial configurations of the cubes  
65 and orientation of the objects in Experiment 1 we could (1) determine how consistent  
66 participants are with themselves and other people, and (2) measure the interactions between  
67 allocentric 3D shape and egocentric perspective on those shapes. If actors take the properties  
68 of their own effectors into account (e.g., hand orientation, grasp size), we should expect the  
69 same 3D shape to be grasped at different locations depending on its orientation relative to the  
70 observer(16). In Experiment 2, we varied the mass and mass distribution of the objects (Figure

71 2c) to test the relative role of 3D shape and mass properties on grasp point selection. If  
72 participants take torques into account, identical shapes with different mass distributions should  
73 yield systematically different grasps(15, 17–19).

74 Next, we employed this rich dataset to develop a computational model to predict human  
75 grasp patterns. We reasoned that grasps are selected to minimize costs associated with  
76 instability and discomfort. Accordingly, we implemented a model that combines five factors  
77 computed from the object's shape, mass distribution, and orientation: (i) force closure(14), (ii)  
78 torque(15–19) (iii) natural grasp axis(16, 20–22), (iv) natural grasp aperture for precision  
79 grip(23) and (v) visibility(24, 25). We find that the model predicts human grasp patterns strikingly  
80 well.

81

## 82 **Results:**

### 83 ***Experiment 1: 3D shape and orientation***

84 **Human grasps are tightly clustered and represent a highly constrained sample from the**  
85 **space of potential grasps.** We asked 12 participants to grasp four objects made of beech  
86 wood presented at two orientations (*Figure 2*; see **Methods**). *Figure 3a* shows how grasp  
87 patterns tend to be highly clustered. In each condition, different grasps have similar size (finger-  
88 to-thumb distance) and orientation, and also cover the same portions of the objects. Fitting  
89 multivariate Gaussian mixture models to the responses reveals that grasps cluster around only  
90 1, 2, or 3 modes. In *Figure 3b* we can observe these distinct modes for object U at orientation 2  
91 in a 2D representation of grasp space, where we can also note that human grasps cover only a  
92 minute portion of the space of potential grasps. *Figure 3c* also shows how, for one  
93 representative condition, different grasps from the same subjects are more clustered than  
94 grasps from different subjects, since individuals predominantly selected only one (70%) or two  
95 (27%) modes, and only rarely (3%) grasped objects in three separate locations.

96

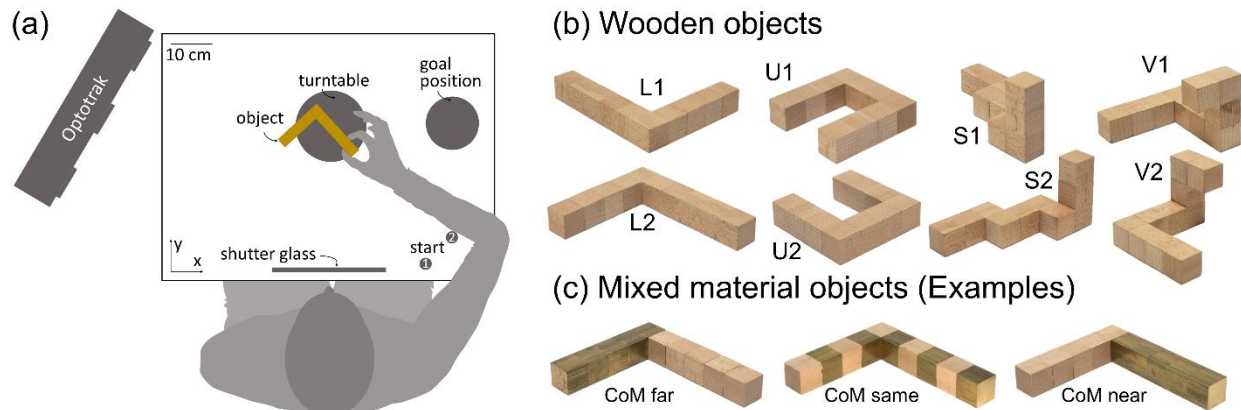

97

98 **Figure 2.** Setup and stimuli. (a) Experimental setup. Seated participants performed grasping  
99 movements with their right hand. Following an auditory signal (coinciding with the shutter  
100 window turning transparent) they moved from one of the starting positions to the object and  
101 grasped it with a precision grip. They transported and released the object at the goal position  
102 and returned to the start position. (b) In Experiment 1 we employed four objects made of  
103 wooden cubes. Each object had a unique shape (that here we name L, U, S, V) and was  
104 presented at one of two different orientations with respect to the participant. (c) In Experiment 2  
105 the objects had the same shapes as in Experiment 1, but now were made of wood and brass  
106 cubes. The brass and wood cubes were organized either in an alternate pattern (middle), so  
107 that the CoM of the object would remain approximately the same as for the wooden object, or  
108 grouped so that the CoM would be shifted either closer to (right) or away from (left) the  
109 participant's hand starting location.

110

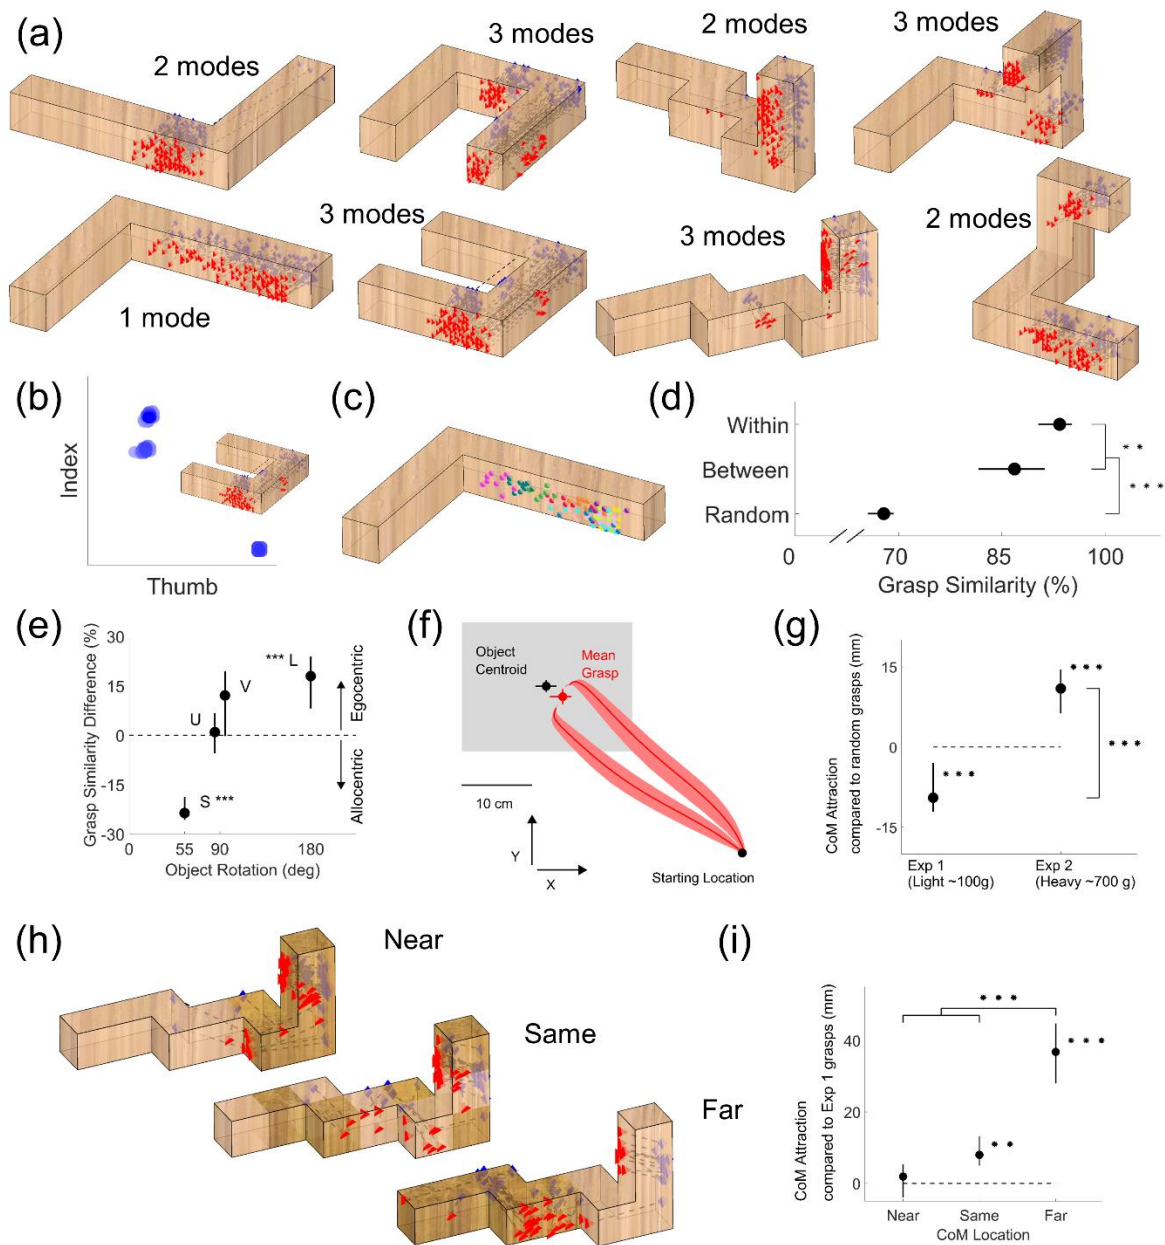

111

112 **Figure 3. Empirical Results. (a)** Human grasps from Experiment 1. Grasps are represented as

113 thumb (red triangles) and index finger (blue diamonds) contact positions, connected by dotted

114 black lines. (b) Human grasps (blue blobs) for object U, orientation 2, when projected in a 2D

115 representation of the space of potential grasps, cluster around three distinct modes. (c)

116 Distribution of thumb contact points on object L, orientation 2. Different colors represent grasps

117 from different participants. **(d)** The level (%) of grasp similarity expected for grasps randomly  
118 distributed on the object surface and the observed level of between- and within-participant grasp  
119 similarity **(e)** Difference in grasp similarity across orientations when grasps were encoded in  
120 object-centered (allocentric) vs human-centered (egocentric) coordinates, as a function of  
121 magnitude of rotation across the two orientation conditions. **(f)** Average grasp trajectories  
122 viewed in the x-y plane (red curves) from start location towards the objects (always contained  
123 within the gray shaded region). The average human grasp (red dot) across conditions is biased  
124 toward shorter reaching movements compared to the object centroids (black dot). **(g)** Attraction  
125 towards the object CoM for grasps executed onto light (Experiment 1) and heavy (Experiment 2)  
126 objects compared to grasps uniformly distributed on the object surfaces (zero reference). **(h)**  
127 Human grasps from Experiment 2 onto object S presented at orientation 2. **(i)** Attraction towards  
128 the object CoM compared to Experiment 1 grasps (zero reference), for Experiment 2 grasps  
129 onto heavy objects whose CoM is closer, the same distance as, or farther than the light wooden  
130 objects from Experiment 1. In all panels, error bars/regions represent 95% bootstrapped  
131 confidence intervals. \*\*  $p < 0.01$ , \*\*\*  $p < 0.001$

132  
133 To further quantify how clustered these grasping patterns are we designed a simple  
134 metric of similarity between grasps (see **Methods**). Figure 3d shows how both between- and  
135 within-subject grasp similarity are significantly higher than the similarity between random grasps  
136 due to object geometry ( $t(7)=9.76$ ,  $p=2.5 \times 10^{-5}$  and  $t(7)=25.11$ ,  $p=4.1 \times 10^{-8}$  respectively).  
137 Additionally, within-subject grasp similarity is significantly higher than between subjects  
138 ( $t(7)=3.89$ ,  $p=0.0060$ ). Nevertheless, the high level of similarity between grasps from different  
139 participants demonstrates that different humans tend to grasp objects in similar ways. The even  
140 higher level of within-subject grasp similarity further demonstrates that grasp patterns from  
141 individual participants are idiosyncratic, which may reflect differences in the strategies employed  
142 by individual participants.



143 **Findings reproduce several known effects in grasp selection.** First, previous research  
144 suggests haptic space is encoded in both egocentric and allocentric coordinates(28), and that  
145 grasps are at least partly encoded in egocentric coordinates to account for the biomechanical  
146 constraints of our arm and hand(16). Our findings reproduce and extend these observations.  
147 For each object we computed grasp similarity across the two orientations in both egocentric and  
148 allocentric coordinates. Figure 3e shows that, as the extent of the object rotation increases,  
149 grasp encoding shifts from allocentric to egocentric coordinates. Across small rotations (object  
150 S, 55 deg rotation), grasps are more similar if encoded in allocentric coordinates ( $t(11)=13.90$ ,  
151  $p=2.5*10^{-8}$ ), whereas for large rotations (object L, 180 degrees) grasps are more similar if  
152 encoded in egocentric coordinates ( $t(11)=4.59$ ,  $p=7.8*10^{-4}$ ). Therefore, both 3D shape as well  
153 as movement constraints influence grasps.

154 Second, Figure 3f shows that participants selected grasps locations that were on  
155 average 26 mm closer to the starting location than the object centroid ( $t(11)=9.74$ ,  $p=9.6*10^{-7}$ ),  
156 reproducing known spatial biases in human grasp selection (12, 25, 27, 29, 30).

157 Third, consistent with Kleinholdermann et al (12) but contrary to previous claims(15–19),  
158 our findings suggest humans care little about torque when grasping light objects. If actors  
159 sought to minimize torque, the selected grasps should be as close as possible to the CoM. In  
160 contrast, Figure 3g shows that for the light weight objects in Experiment 1, grasps were on  
161 average 9 mm farther from the CoM than the average distance to the object's CoM of grasps  
162 uniformly sampled onto the surface of the objects ( $t(11)=4.53$ ,  $p=8.6*10^{-4}$ ).

163

## 164 ***Experiment 2: Mass and Mass Distribution***

### 165 **Humans grasp objects close their center of mass when high grip torques are possible.**

166 Due to the low density of beech wood, even the grasps farthest from the CoM in Experiment 1  
167 would produce relatively low torques. Therefore, in Experiment 2 we tested whether participants  
168 grasp objects closer to the CoM when higher torques are possible. We did this by using objects

169 of greater mass and asymmetric mass distributions. Specifically, for each of the shapes in  
170 Experiment 1, we made three new objects, each made of five brass and five wooden cubes: two  
171 'bipartite' objects, with brass clustered on one or the other half of the object, and one  
172 'alternating' object, with brass and wood alternating along the object's length. These objects had  
173 the same 3D shapes as in Experiment 1, but were nearly tenfold heavier (Figure 2c, see  
174 **Methods**).

175 Figure 3g shows how human grasps are indeed significantly attracted towards the CoM  
176 of heavy objects, presumably to counteract the larger torques associated with higher mass. In  
177 Experiment 2, grasps were on average 11 mm closer to the object CoM than grasps sampled  
178 uniformly from the objects' surfaces ( $t(13)=4.94$ ,  $p=2.7 \times 10^{-4}$ ), and on average 20 mm closer  
179 than the grasps from Experiment 1 ( $t(24)=6.63$ ,  $p=7.4 \times 10^{-7}$ ). Importantly, participants shifted  
180 their grasps towards the CoM—not the geometrical centroid—of the objects (observe how the  
181 grasp patterns shift in Figure 3h). Figure 3i shows that when the object CoM was shifted  
182 towards the hand starting location, participants did not significantly adjust their grasping strategy  
183 compared to Experiment 1 ( $t(13)=0.81$ ,  $p=0.43$ ). Conversely, when the object CoM was in the  
184 same position as in Experiment 1, participants shifted their grasps on average by 8 mm towards  
185 the CoM ( $t(13)=3.92$ ,  $p=0.0017$ ). When the object CoM was shifted away from the hand starting  
186 position, participant grasps were on average 37 mm closer to the object CoM compared to  
187 Experiment 1 grasps ( $t(13)=8.49$ ,  $p=1.2 \times 10^{-6}$ ), a significantly greater shift than both the near and  
188 same CoM conditions ( $t(13)=8.66$ ,  $p=9.2 \times 10^{-7}$  and  $t(13)=7.58$ ,  $p=4.0 \times 10^{-6}$ ). These differential  
189 shifts indicate that participants explicitly estimated each object's CoM from visual material cues.

190 Even with the heavier objects, participants still systematically selected grasp locations  
191 that were closer to the starting location than the object centroid ( $t(13)=4.03$ ,  $p=0.0014$ ).  
192 However, now participants exhibited only a 9 mm bias, which was significantly smaller than the  
193 26 mm bias observed for the light wooden objects in Experiment 1 ( $t(24)=4.67$ ,  $p=9.6 \times 10^{-5}$ ).

194 Together these findings suggest that participants combine multiple constraints to select  
195 grasp locations, taking into consideration the shape, weight, orientation, and mass distribution of  
196 objects, as well as properties of their own body to decide where to grasp objects. We next  
197 sought to develop a unifying model that could predict these diverse effects based on a few  
198 simple underlying principles.

199

### 200 ***Computational model of human grasp selection.***

201 Based on the insights gained from our empirical findings, we developed a computational  
202 model to predict human grasp locations. The model takes as input 3D descriptions of the  
203 objects' shape, mass distribution, orientation, and position relative to the participant, and  
204 computes as output a *grasp cost function*, describing the costs associated with every possible  
205 combination of finger and thumb position on accessible surface locations (i.e., those not in  
206 contact with table). We reasoned that humans would tend to grasp objects at or close to the  
207 minima of this cost function, as these would yield the most stable, comfortable grasps. Low cost  
208 grasps can then be projected back onto the object to compare against human grasps. It is  
209 important to note that this is not intended as a process model describing internal visual or motor  
210 representations (i.e., we do not suggest that the human brain explicitly evaluates grasp cost for  
211 all possible surface locations). Rather, the model is a way of combining a subset of the factors  
212 which are known to influence human grasp selection into a single, unifying framework (12).

213 For each object, we create a triangulated mesh model in a 3D coordinate frame, from  
214 which we can sample (Figure 4a-b). For precision grip, we assume one contact point each for  
215 thumb and index finger. Thus, all possible precision grip grasps can be ordered on a 2D plane,  
216 with all possible thumb contact points along the x-axis, and on the y-axis, all possible index  
217 contacts in the same ordering as for the thumb.

218

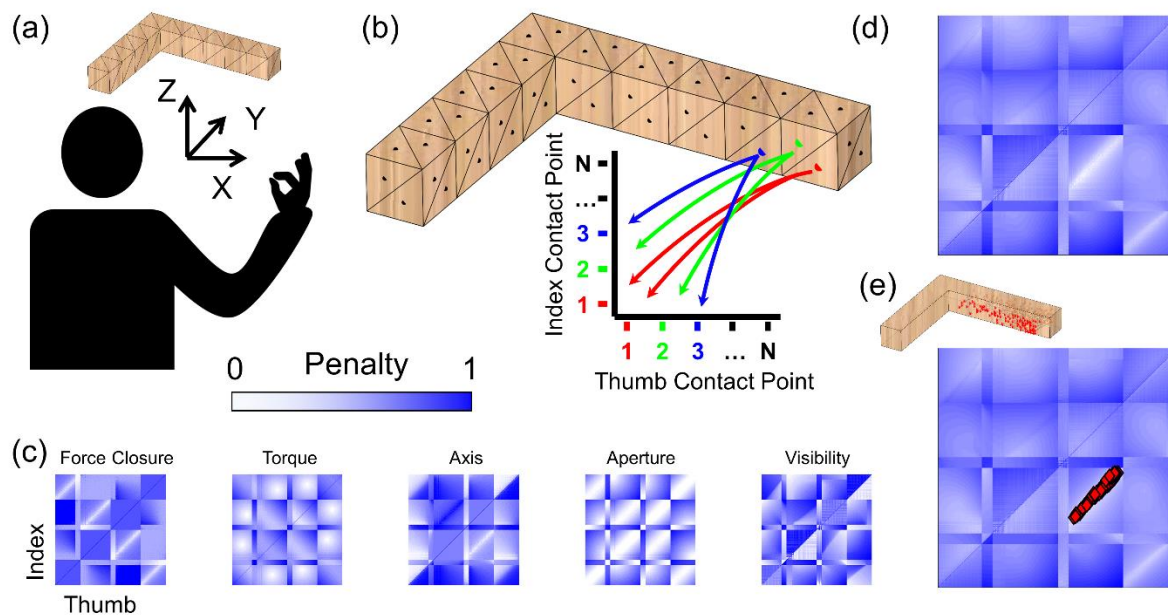

219

220 **Figure 4.** A framework that unifies distinct aspects of grasp selection. (a) Mesh model of object  
221 in same 3D reference frame as participant poised to execute grasp. (b) Discrete sampling of the  
222 surface defines a 2D space containing all potential combinations of index and thumb contact  
223 points on the object. (c) Color-coded maps showing penalty values for each potential grasp for  
224 each penalty function. (d) Overall penalty function computed as the linear combination of maps  
225 in (c). (e) Human grasps projected into 2D penalty-function space neatly align with minimum of  
226 combined penalty map.

227

228 To estimate the cost associated with each grasp, we take a (weighted) linear combination of five  
229 *penalty functions*, determined by the physical properties of the graspable object (surface shape,  
230 orientation, mass, mass distribution) as well by the physical constraints of the human actuator  
231 (i.e. the human arm/hand). Specifically, we consider optimality criteria based on: (i) optimum  
232 force closure(14), (ii) minimum torque(15–19), (iii) alignment with the natural grasp axis(16, 20–  
233 22), (iv) optimal grasp aperture(23), and (v) optimal visibility(24, 25, 27). (see **Methods** for  
234 mathematical definitions). Figure 5(c) shows maps for each penalty function: white indicates low

235 penalty, dark blue high penalty. To compare and combine penalty, values are always  
236 normalized to [0,1].

237 **Force closure:** force closure is fulfilled when the two contact-point surface normals, along  
238 which gripping forces are applied, are directed towards each other(14). Thus, we penalize  
239 lateral offsets between the grasp point normals.

240 **Minimum torque:** grasping an object far from its CoM results in high torque, which causes the  
241 object to rotate when picked up(15–19). Large gripping forces would be required to prevent the  
242 object from rotating. We therefore penalize torque magnitude.

243 **Natural grasp axis:** when executing precision grip grasps, humans exhibit a preferred hand  
244 posture known as the *natural grasp axis*(16, 20–22). Grasps that are rotated away from this axis  
245 result in uncomfortable or restrictive hand/arm configurations. We therefore penalize angular  
246 misalignment between each candidate grasp and the natural grasp axis (taken from (21)).  
247 Unlike force closure and torque, this penalty map is asymmetric about the diagonal.

248 **Optimal grasp aperture:** humans prefer the distance between finger and thumb at contact  
249 ('grasp aperture') to be below 2.5 cm(23). We therefore penalize grasp apertures above 2.5 cm.

250 **Optimal visibility:** our behavioral data, and previous studies, suggest humans exhibit spatial  
251 biases when grasping. It has been proposed that these may arise from an attempt to minimize  
252 energy expenditures through shorter reach movements(24). However, Paulun et al (25) have  
253 shown that these biases may in fact arise from participants attempting to optimize object  
254 visibility. While our current dataset was not designed to untangle these competing hypotheses,  
255 re-analyzing published data (19, 27) confirms that object visibility—not reach length—is most  
256 likely responsible for the biases. We therefore penalized grasps that hindered object visibility.  
257 We also designed a penalty function for reach length and verified that, since reach length and  
258 object visibility are correlated in our dataset, employing one or the other penalty function yields  
259 very similar results.

260

261           We assume that participants select grasps with low overall costs across all penalty  
262 functions. Thus, to create the overall grasp penalty function, we take a (weighted) linear sum of  
263 the individual penalty maps. The minima of this full penalty map represent grasps that best  
264 satisfy all criteria simultaneously. The map in Figure 5d exhibits a clear minimum: the white  
265 region in its lower right quadrant.

266           To assess the agreement between human and optimal grasps, we may visualize human  
267 grasps in the 2D representation of the grasp manifold. The red markers in Figure 5(e) are the  
268 human grasps from object L at orientation 2, projected in 2D and overlain onto the full penalty  
269 map. Human grasps neatly align with the minima of the penalty map.

270 **Model Fitting.** The simple, equally-weighted combination of constraints considered thus far  
271 agrees with human grasping behavior surprisingly well. However, it is unlikely that actors treat  
272 all optimality criteria as equally important. Different persons likely weight the constraints  
273 differently (e.g., due to strength or hand size). Therefore, we developed a method for fitting full  
274 penalty maps to participants' responses. We assigned variable weights to each optimality  
275 criterion, and fit these weights to the grasping data from each participant, to obtain a set of full  
276 penalty maps whose minima best align with each participant's grasps (see **Methods**).

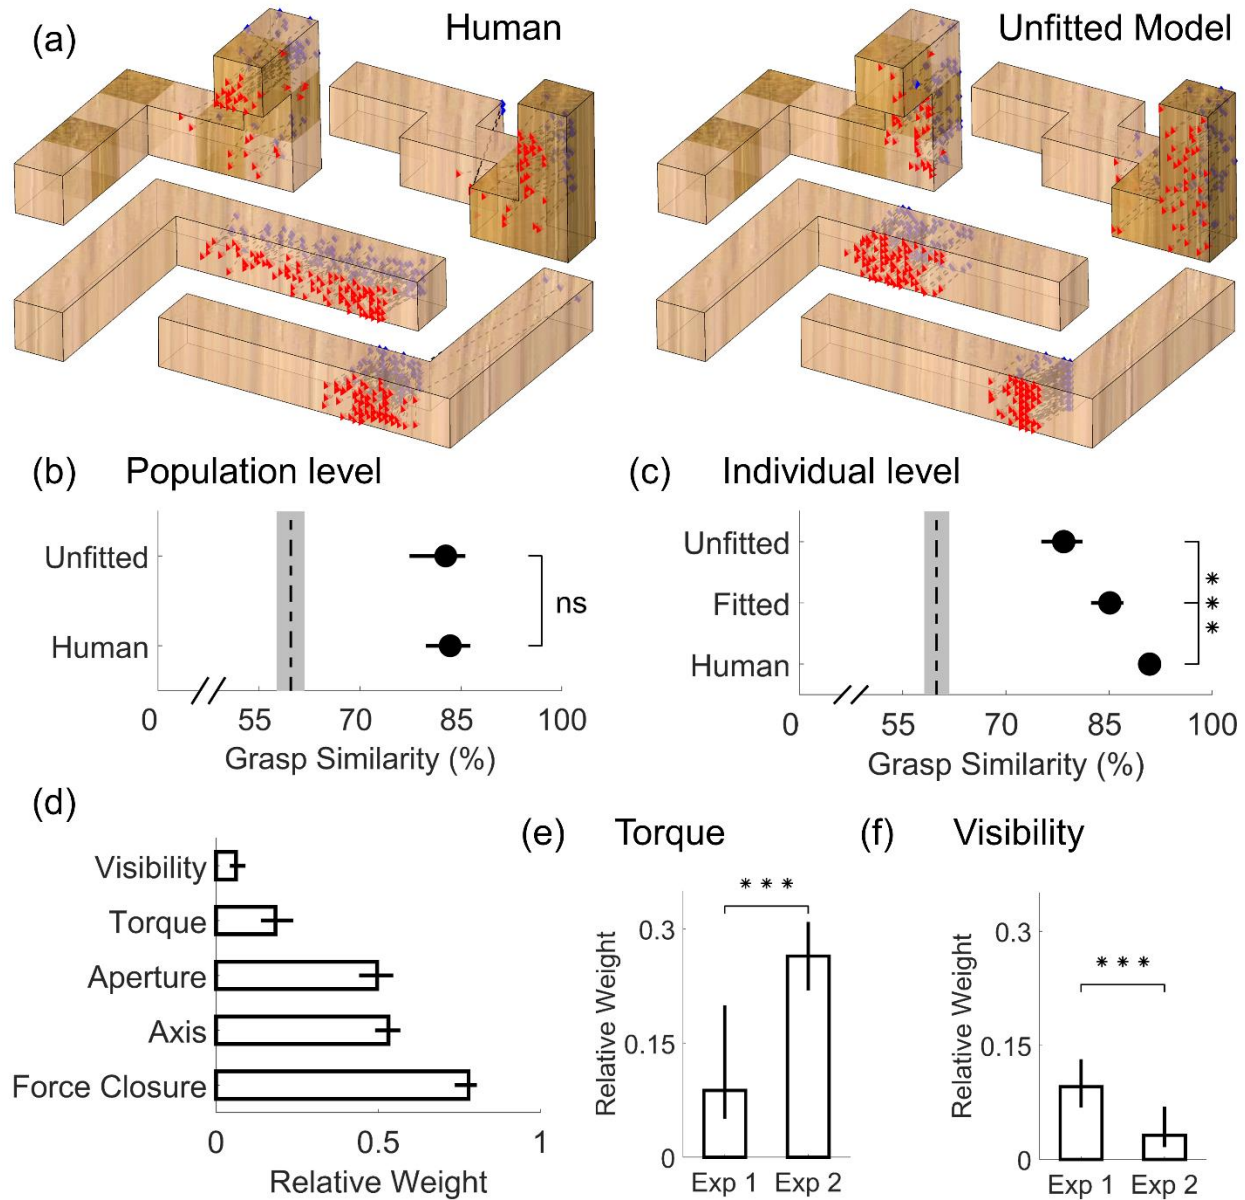

277

278 **Figure 5. Computational Results.** (a) Grasping patterns predicted through the computational  
 279 framework (right) closely resemble human grasps onto real objects varying in shape,  
 280 orientation, and material (left). Simulated grasp patterns are generated with no knowledge of our  
 281 human data (i.e. model not fit to human grasps). (b) Population level grasp similarity, i.e.  
 282 similarity of human and unfitted model grasps to median human grasp across all participants.  
 283 (c) Individual level grasp similarity, i.e. similarity of human, unfitted, and fitted model grasps to  
 284 the median grasp of each participant. In panels (b,c), dashed line is estimated chance level of

285 *grasp similarity due to object geometry, bounded by 95% bootstrapped confidence intervals. (d)*  
286 *Pattern of fitted weights across Experiments 1 and 2. (e) Relative weight of the minimum torque*  
287 *constraint in Experiments 1 and 2. (f) Relative weight of the visibility constraint in Experiments 1*  
288 *and 2. Data are means; error bars, 95% bootstrapped confidence intervals. \*\*\* $p < 0.001$*

289

290 **Model grasps are nearly indistinguishable from measured human grasps.** To compare  
291 human and optimal grasps directly, we can sample predicted optimal grasps from around the  
292 minimum of the full penalty map (see **Methods**) and project back onto the objects. Figure 5a  
293 shows human grasps (left) and unfitted model predictions (right) on a few representative objects  
294 (see Supplementary Figure S1 for complete set). Human and predicted grasps have similar size  
295 and orientation, and also cover similar portions of the objects.

296 Figure 5b depicts grasp similarity at the population level, i.e., across participants and  
297 between human and unfitted model grasps. Grasp similarity between participants was computed  
298 (for each object and condition), as the similarity between the median grasp of each participant  
299 and the median grasp across all others. Grasp similarity between human and model grasps was  
300 computed as the similarity between the median unfitted model grasp and the median grasp  
301 across all participants.

302 Unfitted model grasps were significantly more similar to human grasps than chance  
303 ( $t(31)=10.79$ ,  $p=5.0 \times 10^{-12}$ ), and effectively indistinguishable from human-level grasps similarity  
304 ( $t(31)=0.31$ ,  $p=0.76$ ). Note that this does not mean our current approach perfectly describes  
305 human grasping patterns; it suggests instead that our framework is able to predict the median  
306 human grasping patterns nearly as well as the grasps of a random human on average  
307 approximate the median human grasp.

308 **Fitting the model can account for individual grasp patterns.** In both Experiments,  
309 participants repeatedly grasped the same objects in randomized order. Figure 5c depicts how  
310 similar human and model grasps are to the median grasp of each individual participant in each



311 experimental condition. Individual subjects are highly consistent when grasping the same object  
312 on separate trials. Grasps predicted through our framework with no knowledge of the empirical  
313 data were significantly less similar to the median grasps of individual humans ( $t(31)=9.33$ ,  
314  $p=1.6*10^{-10}$ ). This is unsurprising, since the unfitted model predicts the average pattern across  
315 observers, but there is no mechanism for it to capture idiosyncrasies of individual humans.  
316 Fitting the model to the human data (see **Methods**) significantly improved grasp similarity  
317 ( $t(31)=5.00$ ,  $p=2.1*10^{-5}$ ). Note however that model grasp patterns fit to a single participant are  
318 still distinguishable from random real grasps by the same individual ( $t(31)=4.85$ ,  $p=3.3*10^{-5}$ ).

### 319 **Force closure, hand posture, and grasp size explain most of human grasp point**

320 **selection.** The pattern of fitted weights across both experiments (Figure 5d) reveals the relative  
321 importance of the different constraints. Specifically, we find that force closure is the most  
322 important constraint on human grasping, which makes sense because force closure is a  
323 physical requirement for a stable grasp. Next in importance are natural grasp axis and optimal  
324 grasp aperture, both constraints given by the posture and size of our actuator (our hand). In  
325 comparison, participants appear to care only marginally about minimizing torque, and almost  
326 negligibly about object visibility.

327 **Analyzing the patterns of fitted weights confirms our empirical findings.** The model also  
328 replicates our main empirical findings in a single step. Figure 5e shows that the relative  
329 importance of torque was much greater for the heavy objects tested in Experiment 2 compared  
330 to the light objects from Experiment 1 ( $t(24)=4.40$ ,  $p=1.9*10^{-4}$ ). Conversely, Figure 5f shows that  
331 the relative importance of object visibility instead decreased significantly from Experiment 1 to  
332 Experiment 2 ( $t(24)=3.07$ ,  $p=0.0053$ ). Additionally, by simulating grasps from the fitted model,  
333 we are able to recreate the qualitative patterns of all behavioral results presented in Figure 3  
334 (see Supplementary Figure S2).

335

336

337 **Discussion:**

338 We investigated how an object's 3D shape, orientation, mass, and mass distribution jointly  
339 influence how humans select grasps. Our empirical analyses showed that grasping patterns are  
340 highly systematic, both within and across participants, suggesting that a common set of rules  
341 governs human grasp selection of complex, novel 3D objects. Our findings reproduce, unify,  
342 and generalize many effects observed previously: (1) both 3D shape and orientation determine  
343 which portion of the object people grasp (8, 12, 15, 16, 31–34).; (2) humans exhibit spatial  
344 biases even with complex 3D objects varying in shape and mass(12, 25, 27, 29, 30); (3) object  
345 weight modulates how much humans take torque into account when selecting where to grasp  
346 objects(15–19). We then combined this diverse set of observations into a unified theoretical  
347 framework that predicts human grasping patterns strikingly well, even with no free parameters.  
348 By fitting the computational model to human behavioral data, we showed that force closure,  
349 hand posture, and grasp size are the primary determinants of human grasp selection, whereas  
350 torque and visibility modulate grasping behavior to a much lesser extent.

351 **3D Shape** Behavioral research on the influence of shape on grasping is surprisingly scarce,  
352 primarily employs 2D or simple geometric 3D stimuli of uniform materials, and rarely  
353 investigates grasp selection (8, 15, 16, 31–34). For example, by using 3D stimuli that only  
354 varied in shape by a few centimeters, Schettino et al(33) concluded that object shape influences  
355 hand configuration only during later phases of a reaching movement during which subjects use  
356 visual feedback to optimize their grasp. Here, we show that distinct 3D shapes are grasped in  
357 systematically distinct object locations, and our behavioral and model analyses can predict  
358 these locations directly from the object 3D shape.

359 **Orientation** When grasping spheres or simple geometrical shapes, humans exhibit a preferred  
360 grasp orientation (the NGA) (16, 20–22), and most previous work on how object orientation  
361 influences grasping has primarily focused on hand kinematics(15, 19, 32, 35). Conversely, with  
362 more complex 3D shapes we show that the same portion of an object is selected within a range

363 of orientations relative to the observer, whereas for more extreme rotations the grasp selection  
364 strategy shifts significantly. Therefore, object shape and orientation together determine which  
365 portion of an object will be grasped, and thus the final hand configuration.

366 **Spatial Biases** The spatial biases we observe are consistent with participants attempting to  
367 increase object visibility(25, 27), and our data also replicate the finding that these biases are  
368 reduced when object weight increases(19, 25).

369 **Material/Weight/Torque** Goodale et al(15) were among the first to show that participants tend  
370 to grasp objects through their CoM, presumably to minimize torque. Lederman and Wing(16)  
371 found similar results, yet in both studies low-torque grasps also correlated with grasps that  
372 satisfied force closure and aligned with the natural grasp axis. Kleinholdermann et al(12) found  
373 torque to be nearly irrelevant in grasp selection, yet Paulun et al(19) observed that grasp  
374 distance to CoM was modulated by object weight and material. Our findings resolve these  
375 conflicting findings. By using stimuli that decorrelate different aspects of grasp planning, we find  
376 that shape and hand configuration are considerably more important than torque for light weight  
377 objects, and that the importance of minimizing torque scales with mass. Additionally, shifting an  
378 object's mass distribution significantly attracted grasp locations towards the object's shifted  
379 CoM, demonstrating that participants could reliably combine global object shape and material  
380 composition to successfully infer the object's CoM.

381 **Computational Modelling** Previous models of grasping have mainly focused on hand  
382 kinematics and trajectory synthesis(2–6) whereas we attempt to predict which object locations  
383 will be selected during grasping. Our modelling approach takes inspiration from  
384 Kleinholdermann et al(12), which to the best of our knowledge is the only previous model of  
385 human two-digit contact point selection, but only for 2D shape silhouettes. In addition to dealing  
386 with 3D objects varying in mass, mass distribution, orientation, and position, our modeling  
387 addresses several limitations of previous approaches. The fitting procedure quantifies the  
388 relative importance of different constraints, and can be applied to any set of novel objects to test

389 how experimental manipulations affect this relative weighting. The modular nature of the model  
390 allows additional constraints to be included, excluded or given variable importance. For  
391 example, we know that end-state comfort of the hand plays a role in grip selection(36, 37), yet  
392 the tradeoff between initial and final comfort is unclear(38). By varying the participants' task to  
393 include object rotations, and by including a penalty function penalizing final hand rotations away  
394 from the natural grasp axis, it would be possible to assess the relative importance of initial, final  
395 (or indeed intermediate) hand configurations on grasp planning. The modelling could also be  
396 extended to multi-digit grasping, by adding to each penalty function three dimensions for each  
397 additional finger considered (the x,y,z coordinates of the contact point). This approach is  
398 consistent with (and complementary to) the approach by Smeets and Brenner(2, 5), who posit  
399 that grasping is a combination of multiple pointing movements. Future models should also  
400 generalize from contact points to contact patches of nonzero area, as real human grasp  
401 locations are not only points but larger areas of contact between digit and object. To facilitate  
402 such developments, we provide all data and code (doi:xx.xxxx/zenodo.xxxxxxx upon  
403 publication).

404 **Neuroscience of Grasping** While our model is not meant as a model of brain processes, there  
405 are several parallels with known neural circuitry underlying visual grasp selection (for reviews  
406 see(39–41)). Of particular relevance is the circuit formed between the Ventral Premotor Cortex  
407 (Area F5), Dorsal Premotor Cortex (Area F2), and the Anterior Intraparietal Sulcus (AIP). Area  
408 F5 exhibits 3D-shape-selectivity during grasping tasks and is thought to encode grip  
409 configuration given object shape(42–44), whereas area F2 encodes the grip-wrist orientation  
410 required to grasp objects under visual guidance(45). Both regions exhibit strong connections  
411 with AIP, which has been shown to represent the shape, size, and orientation of 3D objects, as  
412 well as the shape of the handgrip, grip size, and hand-orientation(46). Additionally, visual  
413 material properties, including object weight, are thought to be encoded in the ventral visual  
414 cortex(47–51), and it has been suggested that AIP might play a unique role in linking

415 components of the ventral visual stream involved in object recognition to hand motor  
416 system(52). Therefore, the neural circuit formed between F5, F2, and particularly AIP is a strong  
417 candidate for combining the multifaceted components of visually guided grasping identified in  
418 this work(53–57). Combining targeted investigations of brain activity with the behavioral and  
419 modelling framework presented here holds the potential to develop a unified theory of visually  
420 guided grasp selection.

421

## 422 **Materials and Methods:**

### 423 ***Participants***

424 Twelve naïve participants (5 males and 7 females between the ages of 20 – 31, mean age: 25.2  
425 years) participated in Experiment 1. Fourteen naïve participants (9 males and 5 females  
426 between the ages of 21 and 30, mean age: 24.4 years) participated in Experiment 2.

427 Participants were students at the Justus-Liebig-University Giessen, Germany and received  
428 monetary compensation for participating. All participants reported having normal or corrected to  
429 normal vision and being right handed. All procedures were approved by the local ethics board  
430 and adhered to the declaration of Helsinki. All participants provided written informed consent  
431 prior to participating.

### 432 ***Apparatus***

433 Experiments were programmed in Matlab version R2007a using the Optotrak Toolbox by V. H.  
434 Franz(58). Participants were seated at a table with their head positioned in a chinrest (Figure  
435 2a), in front of an electronically controlled pane of liquid crystal shutter glass(59), through which  
436 only part of the table was visible and which became transparent only for the duration of a trial.  
437 Objects were placed at a target location, 34 cm from the chinrest in the participant's sagittal  
438 plane. Small plastic knobs placed on participants' right side specified the hand starting  
439 positions. A plate (28.5 cm to the right of the goal location and with a 13 cm diameter at 26 cm

440 from start position 1 in the participant's sagittal plane) specified the movement goal location. We  
441 tracked participants' fingertip movements using an Optotrak 3020 infrared tracking system. The  
442 Optotrak cameras were located to the left of the participants. To record index finger and thumb  
443 movement, sets of three infrared markers (forming a rigid body) were attached to the base of  
444 the participants' nails. The fingertip and tip of the thumb were calibrated in relation to the marker  
445 position, as participants grasped a wooden bar with a precision grip, placing their fingertips at  
446 two known locations on the bar.

#### 447 ***Stimuli***

448 **Experiment 1: Light objects made of wood.** Four differently shaped objects (defined as  
449 objects L, U, S and V; Figure 2b) each composed of 10 wooden (beech) cubes ( $2.5^3 \text{ cm}^3$ ),  
450 served as stimuli. Objects were fairly light with a mass of 97 g. Two of the objects featured  
451 cubes stacked on top of each other, whereas the other two objects were composed exclusively  
452 of cubes lying flat on the ground. The objects were presented to the participants at one of two  
453 orientations. Across orientations, object L was rotated by 180 degrees, objects U and V were  
454 rotated by 90 degrees, and object S was rotated by 55 degrees. Figure 2b shows the objects  
455 positioned as if viewed by a participant.

456 **Experiment 2: Heavy composite objects made of wood and brass.** For each of the 4 shapes  
457 from Experiment 1, we created 3 new objects (12 in total) to serve as stimuli for Experiment 2  
458 (Figure 2c). Individual cubes were made of either wood or brass. The objects were composed of  
459 5 cubes of each material, which made them fairly heavy with a mass of 716g. By reordering the  
460 sequence of wood and brass cubes, we shifted the location of each shape's CoM. For each  
461 shape we made one object in which brass and wooden cubes alternated with one another, and  
462 two bipartite objects, where the 5 brass cubes were connected to one another to make up one  
463 side of the object with the wooden cubes making up the other side. This configuration was also  
464 inverted, (i.e., wooden and brass cubes switched locations). All objects were presented at the  
465 same two orientations as Experiment 1.

466 **Object meshes.** Triangulated mesh replicas of all objects were created in Matlab; each cube  
467 face consisted of 128 triangles. To calibrate mesh orientation and position, we measured, using  
468 the Optotrack, four non planar points on each object at each orientation. We aligned the model  
469 to the same coordinate frame employed by the Optotrack using Procrustes analysis.

#### 470 ***Procedure***

471 Prior to each trial, participants placed thumb and index finger at a pre-specified starting location.  
472 In Experiment 1, two start locations were used (start 1 at 28 cm to the right of the chinrest in the  
473 participant's coronal plane and 9.5 cm forward in the sagittal plane; start 2 9 cm further to the  
474 right and 3 cm further forward, 23 cm from the center of the goal plate). Given that we observed  
475 no effect of starting position in our data, in Experiment 2 only the first starting location was  
476 employed. When the subject was at the correct start position, the experimenter placed one of  
477 the stimulus objects at the target location behind the opaque shutter screen. Each object could  
478 be presented at one of two orientations with respect to the participant. The experimenter could  
479 very precisely position each object at the correct location and orientation by aligning two small  
480 grooves under each object with two small pins on the table surface.

481 Once both stimulus and participant were positioned correctly, a tone indicated the beginning of  
482 a trial, at which point the shutter window turned translucent. Participants were then required to  
483 pick up the object using only forefinger and thumb and place it at the goal location. Participants  
484 had 3 seconds to complete the task before the shutter window turned opaque. In Experiment 1,  
485 no instructions were given regarding how the objects had to be picked up. In Experiment 2,  
486 participants were instructed to keep the objects as level as possible.

487 Experiment 1 had sixteen conditions: two starting locations, four wooden objects of different  
488 shapes, each object presented at two orientations. Each participant repeated each condition five  
489 times (eighty trials per participant).

490 Experiment 2 had thirty-six conditions: twelve distinct objects (four shapes in three material  
491 configurations) presented at two orientations. Half of the participants handled only shapes L and

492 V, the other half handled shapes U and S. Each participant repeated each condition seven  
493 times (eighty-four trials per participant). In both experiments trial order was randomized.  
494 Following each trial, the experimenter visually inspected the movement traces to determine  
495 whether a grasp was successful or not. Grasps were deemed unsuccessful when the movement  
496 was too slow, when an object was dropped, or when tracking was lost. Unsuccessful grasps  
497 were marked as error trials, added to the randomization queue, and repeated. A total of 368  
498 error trials (13.8% of trials from Experiment 1 and 13.9% from Experiment 2) were not analyzed.

### 499 ***Training***

500 Each participant completed six practice trials (using a Styrofoam cylinder in Experiment 1, and  
501 by lifting random objects from the shapes not used in that participant's run in Experiment 2) prior  
502 to the experiment to give them a sense for how fast their movement should be in order to  
503 complete the entire movement within three seconds. Practice trial data were not used in  
504 analyses. Prior to Experiment 2, participants were familiarized with the relative weight of brass  
505 and wood using two rectangular cuboids of dimensions 12.5x2.5x2.5 cm, one of wood (50 g)  
506 and one of brass (670 g).

### 507 ***Analyses***

508 All analyses were performed in Matlab version R2018a. Differences between group means were  
509 assessed via paired or unpaired t-tests, as appropriate. Values of  $p < 0.05$  were considered  
510 statistically significant.

511 **Contact points.** Contact points of both fingers with the object were determined as the fingertip  
512 coordinates at the time of first contact, projected onto the surface of the triangulated mesh  
513 models of the object. The time of contact with the object was determined using the methods  
514 developed by Schot et al (60) and previously described in Paulun et al (19).

515 **Grasp similarity.** We described each individual grasp  $\vec{G}$  as a 6D vector of the x,y,z coordinates  
516 of the thumb and index finger contact points:



517 
$$\vec{G} = [x_T, y_T, z_T, x_I, y_I, z_I]$$

518 To compute the similarity  $S$  between two grasps  $\vec{G}_1$  and  $\vec{G}_2$ , we first computed the Euclidian  
519 distance between the two 6D grasp vectors. We then divided this distance by the largest  
520 possible distance between two points on the specific object  $D_{max}$ , determined from the mesh  
521 models of the objects. Finally, similarity was defined as 1 minus the normalized grasp distance,  
522 times 100:

523 
$$S = 100 * \left( 1 - \frac{\|\vec{G}_1 - \vec{G}_2\|}{D_{max}} \right)$$

524 In this formulation, two identical grasps, which occupy the same point in a 6D space, will be  
525 100% similar, whereas the two farthest possible grasps onto a specific object will be 0% similar.  
526 Within-subject grasp similarity was the average similarity between grasps from the same  
527 participant to the participant's own median grasp. Between-subject grasp similarity was the  
528 similarity between the median grasp of each participant and the median grasp across all other  
529 participants.

### 530 **Computational model**

531 The model takes as input 3D meshes of the stimuli and outputs a cost function describing the  
532 costs associated with every possible combination of finger and thumb position on the accessible  
533 surface locations of our objects (i.e., those not in contact with the table plane). First, we define  
534 the center of each triangle in the mesh as a potential contact point. Then, given all possible  
535 combinations of thumb and index finger contact points  $\overline{CP}_T = [x_T, y_T, z_T]$ ;  $\overline{CP}_I = [x_I, y_I, z_I]$ , the  
536 surface normal at both contact points  $\vec{n}_T = [x_T^n, y_T^n, z_T^n]$ ;  $\vec{n}_I = [x_I^n, y_I^n, z_I^n]$ , and the CoM of the  
537 object  $\overline{CoM} = [x_{CoM}, y_{CoM}, z_{CoM}]$ , the five penalty functions we combined into a computational  
538 model of grasp selection were defined as follows:

539 **Force closure.** For two-digit grasping, a grasp fulfills force closure when the grasp axis  
540 connecting thumb and index contact points lies within the friction cones resulting from the

541 friction coefficient between object and digits(14). A grasp perfectly fulfills force closure when the  
 542 grasp axis is perfectly aligned with the vectors along which gripping forces are applied, which  
 543 are the opposite of the contact-point surface normals. Therefore, we defined the force closure  
 544 penalty function as the sum of the angular deviances (computed using the atan2 function) of the  
 545 grasp axis from both force vectors  $\vec{F}_T = -\vec{n}_T$ ;  $\vec{F}_I = -\vec{n}_I$ :

$$546 \quad P_{FC}(\vec{CP}_T, \vec{CP}_I) = \text{atan2}(\|\vec{F}_T \times (\vec{CP}_I - \vec{CP}_T)\|, \vec{F}_T \cdot (\vec{CP}_I - \vec{CP}_T)) \\ 547 \quad + \text{atan2}(\|\vec{F}_I \times (\vec{CP}_T - \vec{CP}_I)\|, \vec{F}_I \cdot (\vec{CP}_T - \vec{CP}_I))$$

548 **Torque.** If a force is applied at some position away from the CoM, the object will tend to rotate  
 549 due to torque, given by the cross product of force vector and lever arm (the vector connecting  
 550 CoM to the point of force application). Under the assumption that is possible to apply forces at  
 551 the thumb and index contact points that counteract the force of gravity  $\vec{F}_g$ , we can compute the  
 552 total torque of a grip as the sum of torques exerted by each contact point. Therefore, we defined  
 553 the torque penalty function as the magnitude of the total torque exerted by a grip:

$$554 \quad P_T(\vec{CP}_T, \vec{CP}_I) = \|(\vec{CoM} - \vec{CP}_T) \times -\vec{F}_g + (\vec{CoM} - \vec{CP}_I) \times -\vec{F}_g\|$$

555 **Natural grasp axis.** Schot, Brenner and Smeets(21) have carefully mapped out how human  
 556 participants grasp spheres placed at different positions throughout the peripersonal space, and  
 557 provide a regression model that determines the naturally preferred posture of the arm when  
 558 grasping a sphere. We input the configuration of our current experimental setup into the  
 559 regression model developed by these authors, and found the natural grasp axis for our  
 560 participants to be  $\vec{NGA} = [0.49 \ 0.87 \ 0]$ . We therefore defined the natural grasp axis penalty  
 561 function as the angular deviance from this established natural grasp axis:

$$562 \quad P_{NGA}(\vec{CP}_T, \vec{CP}_I) = \text{atan2}(\|\vec{NGA} \times (\vec{CP}_I - \vec{CP}_T)\|, \vec{NGA} \cdot (\vec{CP}_I - \vec{CP}_T))$$

563 **Optimal grasp aperture for precision grip.** Cesari and Newell(23) have shown that, when free  
 564 to employ any multi-digit grasp, human participants selected precision grip grasps only for  
 565 cubes smaller than 2.5 cm in length. As cube size increases, humans progressively increase the

566 number of digits employed in a grasps. Therefore, since our participants were instructed only to  
 567 employ precision grip grasps, we defined the optimal grasp aperture penalty function as 0 for  
 568 grasp sizes smaller than 2.5 cm, and as a linearly increasing penalty for grasp sizes larger than  
 569 2.5 cm:

$$570 \quad P_{OGA}(\overrightarrow{CP_T}, \overrightarrow{CP_I}) = \begin{cases} 0, & \text{if } \|\overrightarrow{CP_I} - \overrightarrow{CP_T}\| < 25mm \\ \|\overrightarrow{CP_I} - \overrightarrow{CP_T}\| - 25, & \text{if } \|\overrightarrow{CP_I} - \overrightarrow{CP_T}\| > 25mm \end{cases}$$

571 **Object Visibility.** Under the assumption that humans are attempting to minimize the portion of  
 572 the objects hidden from view by their hand, we defined the optimal visibility penalty function as  
 573 the proportion of object still visible during each possible grasp. We first defined the line on the  
 574 XZ plane that passes through the thumb and index finger contact points. We made the  
 575 simplifying assumption that, given all possible surface points on the object  $SP_{TOT}$ , the surface  
 576 points  $SP_{OCC}(\overrightarrow{CP_T}, \overrightarrow{CP_I})$  that fall to the side of the line where the hand is located will be  
 577 occluded. Therefore, the object visibility penalty function was defined as:

$$578 \quad P_{OGA}(\overrightarrow{CP_T}, \overrightarrow{CP_I}) = \frac{Length(SP_{OCC}(\overrightarrow{CP_T}, \overrightarrow{CP_I}))}{Length(SP_{TOT})}$$

579 **Overall grasp penalty function.** To obtain the overall grasp penalty function, each grasp  
 580 penalty function was first normalized to the [0 1] range (i.e., across all possible grasps for each  
 581 given object, independently of the other objects). Then, we took a weighted linear sum of the  
 582 individual penalty functions, with all weights equal to 1:

$$583 \quad P_O(\overrightarrow{CP_T}, \overrightarrow{CP_I}) = P_{FC}(\overrightarrow{CP_T}, \overrightarrow{CP_I}) + P_T(\overrightarrow{CP_T}, \overrightarrow{CP_I}) + P_{NGA}(\overrightarrow{CP_T}, \overrightarrow{CP_I}) + \\ 584 \quad P_{OGA}(\overrightarrow{CP_T}, \overrightarrow{CP_I}) + P_{RT}(\overrightarrow{CP_T}, \overrightarrow{CP_I})$$

585 For display purposes this final function was normalized to the [0 1] range. The minima of this  
 586 overall grasp penalty function represent the set of grasps that best satisfy the largest number of  
 587 constraints at the same time.

588 **Model fitting.** In both Experiments 1 and 2, human participants executed repeated grasps to  
 589 the same objects at each orientation. To fit the overall grasp penalty function to these human  
 590 data, for each participant in each condition we first defined a human grasp penalty function  
 591  $P_H(\overrightarrow{CP_T}, \overrightarrow{CP_I})$  in which all grasps selected by a participant onto an object were set to have 0  
 592 penalty, and all grasps that had not been selected were set to have a penalty of 1. Then, we fit  
 593 the function:

$$594 \quad P_{O,fit}(\overrightarrow{CP_T}, \overrightarrow{CP_I}) = \sum_i C_i * P_i(\overrightarrow{CP_T}, \overrightarrow{CP_I})$$

595 to the human grasp penalty function. More specifically, we employed a nonlinear least-squares  
 596 solver to search for the set of coefficients  $C_i = [C_{FC}; C_T; C_{NGA}; C_{OGA}; C_{RT}]$  that minimized the  
 597 function:

$$598 \quad F(C_i) = \sqrt{W(\overrightarrow{CP_T}, \overrightarrow{CP_I}) * \left[ \left( \sum_i C_i * P_i(\overrightarrow{CP_T}, \overrightarrow{CP_I}) \right) - P_H(\overrightarrow{CP_T}, \overrightarrow{CP_I}) \right]}$$

599 i.e. we searched for the set of coefficients for which  $P_{O,fit}$  best approximated the human grasp  
 600 penalty function  $P_H$ . The solver employed the trust-region-reflective algorithm; we set the lower  
 601 and upper bounds of the coefficients to be 0 and 1, and 0.2 as the starting value for all  
 602 coefficients. Critically,  $W(\overrightarrow{CP_T}, \overrightarrow{CP_I})$  was a weight function which served to give equal weight to  
 603 high and low penalty grasps in the human grasp penalty function, since the number of non-  
 604 selected grasps with  $P_H(\overrightarrow{CP_T}, \overrightarrow{CP_I}) = 1$  vastly outnumbered the few selected grasps for which  
 605  $P_H(\overrightarrow{CP_T}, \overrightarrow{CP_I}) = 0$ . Thus, for grasps where  $P_H(\overrightarrow{CP_T}, \overrightarrow{CP_I}) = 0$ ,  $W(\overrightarrow{CP_T}, \overrightarrow{CP_I})$  was equal to the  
 606 number of times the participant had selected that specific grasp. For grasps where  
 607  $P_H(\overrightarrow{CP_T}, \overrightarrow{CP_I}) = 1$  instead,  $W(\overrightarrow{CP_T}, \overrightarrow{CP_I}) = \frac{N_{G,selected}}{N_{G,non-selected}}$ ; where  $N_{G,selected}$  was the total number  
 608 of grasps performed by the participant onto the object, and  $N_{G,non-selected}$  was the total number  
 609 of non-selected grasps within the grasp manifold.

610 **Predicting Grasps.** The minima of both the equally weighted (non-fitted) and the fitted overall  
611 grasp penalty functions represent the set of grasps predicted to be optimal under the weighted  
612 linear combination of the five penalty functions included in our computational model. To  
613 visualize these predicted optimal grasps, we sampled them from the minima of the penalty  
614 functions. First, we removed all grasps with penalty values greater than the lower 0.1th  
615 percentile. The remaining grasps were therefore all optimal or near-optimal. From this subset,  
616 we then randomly selected (with replacement) a number of grasps equal to the number of  
617 grasps executed by the human participants. The probability with which any one grasp was  
618 selected was set to be 1 minus the grasp penalty, thus grasps with zero penalty had the highest  
619 probability of being selected. These sampled grasps can then be projected back onto the  
620 objects for visualization purposes (Figure 5a), or they can be directly compared to human grasp  
621 using the grasp similarity metric described above (Figure 5b,c).

622

623 **Data availability.** Data and analysis scripts will be made available from the Zenodo database  
624 (doi:xx.xxxx/zenodo.xxxxxxx upon publication).

625

626 **Acknowledgments.** The authors thank Dr. Karl Gegenfurtner for insightful feedback. This  
627 research was supported by the DFG (IRTG-1901: 'The Brain in Action' and SFB-TRR-135:  
628 'Cardinal Mechanisms of Perception'), and an ERC Consolidator Award (ERC-2015-CoG-  
629 682859: 'SHAPE'). Guido Maiello was supported by a Marie-Skłodowska-Curie Actions  
630 Individual Fellowship (H2020-MSCA-IF-2017: 'VisualGrasping' Project ID: 793660).

631

## 632 **References**

- 633 1. Levine S, Pastor P, Krizhevsky A, Ibarz J, Quillen D (2018) Learning hand-eye coordination for  
634 robotic grasping with deep learning and large-scale data collection. *The International Journal of*  
635 *Robotics Research* 37(4–5):421–436.
- 636 2. Smeets JBJ, Brenner E (1999) A New View on Grasping. *Motor Control* 3(3):237–271.

- 637 3. Rosenbaum DA, Meulenbroek RJG, Vaughan J, Elsinger C (1999) Approaching Grasping from  
638 Different Perspectives. *Motor Control* 3(3):289–297.
- 639 4. Rosenbaum DA, Meulenbroek RGJ, Vaughan J, Jansen C (1999) Coordination of reaching and  
640 grasping by capitalizing on obstacle avoidance and other constraints. *Experimental Brain Research*  
641 128(1–2):92–100.
- 642 5. Smeets J, Brenner E (2001) Independent movements of the digits in grasping. *Experimental Brain*  
643 *Research* 139(1):92–100.
- 644 6. Christopoulos VN, Schrater PR (2009) Grasping Objects with Environmentally Induced Position  
645 Uncertainty. *PLoS Computational Biology* 5(10):e1000538.
- 646 7. Karok S, Newport R (2010) The continuous updating of grasp in response to dynamic changes in  
647 object size, hand size and distractor proximity. *Neuropsychologia* 48(13):3891–3900.
- 648 8. Eloka O, Franz VH (2011) Effects of object shape on the visual guidance of action. *Vision Research*  
649 51(8):925–931.
- 650 9. Volcic R, Domini F (2014) The visibility of contact points influences grasping movements.  
651 *Experimental Brain Research* 232(9):2997–3005.
- 652 10. Volcic R, Domini F (2016) On-line visual control of grasping movements. *Experimental Brain*  
653 *Research* 234(8):2165–2177.
- 654 11. Bozzacchi C, Volcic R, Domini F (2016) Grasping in absence of feedback: systematic biases endure  
655 extensive training. *Experimental Brain Research* 234(1):255–265.
- 656 12. Kleinholdermann U, Franz VH, Gegenfurtner KR (2013) Human grasp point selection. *Journal of*  
657 *Vision* 13(8):23–23.
- 658 13. Gilster R, Hesse C, Deubel H (2012) Contact points during multidigit grasping of geometric objects.  
659 *Experimental Brain Research* 217(1):137–151.
- 660 14. Nguyen V-D (1988) Constructing Force- Closure Grasps. *The International Journal of Robotics*  
661 *Research* 7(3):3–16.
- 662 15. Goodale MA, et al. (1994) Separate neural pathways for the visual analysis of object shape in  
663 perception and prehension. *Current Biology* 4(7):604–610.
- 664 16. Lederman SJ, Wing AM (2003) Perceptual judgement, grasp point selection and object symmetry.  
665 *Experimental Brain Research* 152(2):156–165.
- 666 17. Eastough D, Edwards MG (2006) Movement kinematics in prehension are affected by grasping  
667 objects of different mass. *Experimental Brain Research* 176(1):193–198.
- 668 18. Lukos J, Ansuini C, Santello M (2007) Choice of Contact Points during Multidigit Grasping: Effect of  
669 Predictability of Object Center of Mass Location. *Journal of Neuroscience* 27(14):3894–3903.

- 670 19. Paulun VC, Gegenfurtner KR, Goodale MA, Fleming RW (2016) Effects of material properties and  
671 object orientation on precision grip kinematics. *Experimental Brain Research* 234(8):2253–2265.
- 672 20. Roby-Brami A, Bennis N, Mokhtari M, Baraduc P (2000) Hand orientation for grasping depends on  
673 the direction of the reaching movement. *Brain Research* 869(1–2):121–129.
- 674 21. Schot WD, Brenner E, Smeets JBJ (2010) Posture of the arm when grasping spheres to place them  
675 elsewhere. *Experimental Brain Research* 204(2):163–171.
- 676 22. Voudouris D, Brenner E, Schot WD, Smeets JBJ (2010) Does planning a different trajectory  
677 influence the choice of grasping points? *Experimental Brain Research* 206(1):15–24.
- 678 23. Cesari P, Newell KM (1999) The scaling of human grip configurations. *Journal of Experimental*  
679 *Psychology: Human Perception and Performance* 25(4):927–935.
- 680 24. Huang HJ, Kram R, Ahmed AA (2012) Reduction of Metabolic Cost during Motor Learning of Arm  
681 Reaching Dynamics. *Journal of Neuroscience* 32(6):2182–2190.
- 682 25. Paulun VC, Kleinholdermann U, Gegenfurtner KR, Smeets JBJ, Brenner E (2014) Center or side:  
683 biases in selecting grasp points on small bars. *Experimental Brain Research* 232(7):2061–2072.
- 684 26. Bozzacchi C, Brenner E, Smeets JB, Volcic R, Domini F (2018) How removing visual information  
685 affects grasping movements. *Experimental Brain Research* 236(4):985–995.
- 686 27. Maiello G, Paulun VC, Klein LK, Fleming RW (2018) Object visibility, not energy expenditure,  
687 accounts for spatial biases in human grasp selection. *bioRxiv*. doi:10.1101/476101.
- 688 28. Volcic R, Kappers AML (2008) Allocentric and egocentric reference frames in the processing of  
689 three-dimensional haptic space. *Experimental Brain Research* 188(2):199–213.
- 690 29. Desanghere L, Marotta JJ (2015) The influence of object shape and center of mass on grasp and  
691 gaze. *Frontiers in Psychology* 6. doi:10.3389/fpsyg.2015.01537.
- 692 30. Glowania C, van Dam LCJ, Brenner E, Plaisier MA (2017) Smooth at one end and rough at the other:  
693 influence of object texture on grasping behaviour. *Experimental Brain Research* 235(9):2821–2827.
- 694 31. Cuijpers RH, Smeets JBJ, Brenner E (2004) On the Relation Between Object Shape and Grasping  
695 Kinematics. *Journal of Neurophysiology* 91(6):2598–2606.
- 696 32. Cuijpers RH, Brenner E, Smeets JBJ (2006) Grasping reveals visual misjudgements of shape.  
697 *Experimental Brain Research* 175(1):32–44.
- 698 33. Schettino LF, Adamovich SV, Poizner H (2003) Effects of object shape and visual feedback on hand  
699 configuration during grasping. *Experimental Brain Research* 151(2):158–166.
- 700 34. Chen Z, Saunders JA (2015) Online processing of shape information for control of grasping.  
701 *Experimental Brain Research* 233(11):3109–3124.

- 702 35. Mamassian P (1997) Prehension of objects oriented in three-dimensional space: *Experimental*  
703 *Brain Research* 114(2):235–245.
- 704 36. Rosenbaum DA, et al. (1990) Constraints for action selection: Overhand versus underhand grips.  
705 *Attention and Performance 13: Motor Representation and Control*. (Lawrence Erlbaum Associates,  
706 Inc, Hillsdale, NJ, US), pp 321–342.
- 707 37. Short MW, Cauraugh JH (1999) Precision hypothesis and the end-state comfort effect. *Acta*  
708 *Psychologica* 100(3):243–252.
- 709 38. Lee Hughes CM, Seegelke C, Schack T (2012) The Influence of Initial and Final Precision on Motor  
710 Planning: Individual Differences in End-State Comfort During Unimanual Grasping and Placing.  
711 *Journal of Motor Behavior* 44(3):195–201.
- 712 39. Castiello U (2005) The neuroscience of grasping. *Nature Reviews Neuroscience* 6(9):726–736.
- 713 40. Castiello U, Begliomini C (2008) The Cortical Control of Visually Guided Grasping. *The*  
714 *Neuroscientist* 14(2):157–170.
- 715 41. Janssen P, Scherberger H (2015) Visual Guidance in Control of Grasping. *Annual Review of*  
716 *Neuroscience* 38(1):69–86.
- 717 42. Theys T, Pani P, van Loon J, Goffin J, Janssen P (2012) Selectivity for Three-Dimensional Shape and  
718 Grasping-Related Activity in the Macaque Ventral Premotor Cortex. *Journal of Neuroscience*  
719 32(35):12038–12050.
- 720 43. Murata A, et al. (1997) Object Representation in the Ventral Premotor Cortex (Area F5) of the  
721 Monkey. *Journal of Neurophysiology* 78(4):2226–2230.
- 722 44. Raos V, Umiltá M-A, Murata A, Fogassi L, Gallese V (2006) Functional Properties of Grasping-  
723 Related Neurons in the Ventral Premotor Area F5 of the Macaque Monkey. *Journal of*  
724 *Neurophysiology* 95(2):709–729.
- 725 45. Raos V, Umiltá M-A, Gallese V, Fogassi L (2004) Functional Properties of Grasping-Related Neurons  
726 in the Dorsal Premotor Area F2 of the Macaque Monkey. *Journal of Neurophysiology* 92(4):1990–  
727 2002.
- 728 46. Murata A, Gallese V, Luppino G, Kaseda M, Sakata H (2000) Selectivity for the Shape, Size, and  
729 Orientation of Objects for Grasping in Neurons of Monkey Parietal Area AIP. *Journal of*  
730 *Neurophysiology* 83(5):2580–2601.
- 731 47. Cant JS, Goodale MA (2011) Scratching Beneath the Surface: New Insights into the Functional  
732 Properties of the Lateral Occipital Area and Parahippocampal Place Area. *Journal of Neuroscience*  
733 31(22):8248–8258.
- 734 48. Hiramatsu C, Goda N, Komatsu H (2011) Transformation from image-based to perceptual  
735 representation of materials along the human ventral visual pathway. *NeuroImage* 57(2):482–494.



- 736 49. Gallivan JP, Cant JS, Goodale MA, Flanagan JR (2014) Representation of Object Weight in Human  
737 Ventral Visual Cortex. *Current Biology* 24(16):1866–1873.
- 738 50. Goda N, Tachibana A, Okazawa G, Komatsu H (2014) Representation of the Material Properties of  
739 Objects in the Visual Cortex of Nonhuman Primates. *Journal of Neuroscience* 34(7):2660–2673.
- 740 51. Goda N, Yokoi I, Tachibana A, Minamimoto T, Komatsu H (2016) Crossmodal Association of Visual  
741 and Haptic Material Properties of Objects in the Monkey Ventral Visual Cortex. *Current Biology*  
742 26(7):928–934.
- 743 52. Borra E, et al. (2008) Cortical Connections of the Macaque Anterior Intraparietal (AIP) Area.  
744 *Cerebral Cortex* 18(5):1094–1111.
- 745 53. Sakata H, Taira M, Murata A, Mine S (1995) Neural Mechanisms of Visual Guidance of Hand Action  
746 in the Parietal Cortex of the Monkey. *Cerebral Cortex* 5(5):429–438.
- 747 54. Jeannerod M, Arbib MA, Rizzolatti G, Sakata H (1995) Grasping objects: the cortical mechanisms of  
748 visuomotor transformation. *Trends in Neurosciences* 18(7):314–320.
- 749 55. Srivastava S, Orban GA, De Maziere PA, Janssen P (2009) A Distinct Representation of Three-  
750 Dimensional Shape in Macaque Anterior Intraparietal Area: Fast, Metric, and Coarse. *Journal of*  
751 *Neuroscience* 29(34):10613–10626.
- 752 56. Davare M, Rothwell JC, Lemon RN (2010) Causal Connectivity between the Human Anterior  
753 Intraparietal Area and Premotor Cortex during Grasp. *Current Biology* 20(2):176–181.
- 754 57. Theys T, Romero MC, van Loon J, Janssen P (2015) Shape representations in the primate dorsal  
755 visual stream. *Frontiers in Computational Neuroscience* 9. doi:10.3389/fncom.2015.00043.
- 756 58. Franz VH Optotrak Toolbox. *The Optotrak Toolbox: Control your Optotrak from within Matlab.*  
757 Available at: <http://www.ecogsci.cs.uni-tuebingen.de/OptotrakToolbox/>.
- 758 59. Milgram P (1987) A spectacle-mounted liquid-crystal tachistoscope. *Behavior Research Methods,*  
759 *Instruments, & Computers* 19(5):449–456.
- 760 60. Schot WD, Brenner E, Smeets JBJ (2010) Robust movement segmentation by combining multiple  
761 sources of information. *Journal of Neuroscience Methods* 187(2):147–155.

762

763

764 Supplementary Information to

765 ***How humans grasp three-dimensional objects***

766 Lina K. Klein <sup>a,†</sup>, Guido Maiello <sup>a,†,\*</sup>, Vivian C. Paulun <sup>a</sup>, Roland W. Fleming <sup>a</sup>

767 <sup>a</sup> Department of Experimental Psychology, Justus-Liebig University Giessen, Giessen 35394,  
768 Germany

769 \* Corresponding Author:

770 Guido Maiello

771 Department of Experimental Psychology, Justus-Liebig University Giessen, Otto-  
772 Behagel-Str.10F, Giessen 35394, Germany

773 Email: [guido\\_maiello@yahoo.it](mailto:guido_maiello@yahoo.it)

774 † joint first authors; these authors contributed equally to this work

775

776 (a) Experiment 1

777 Human

Unfitted Model

Fitted Model

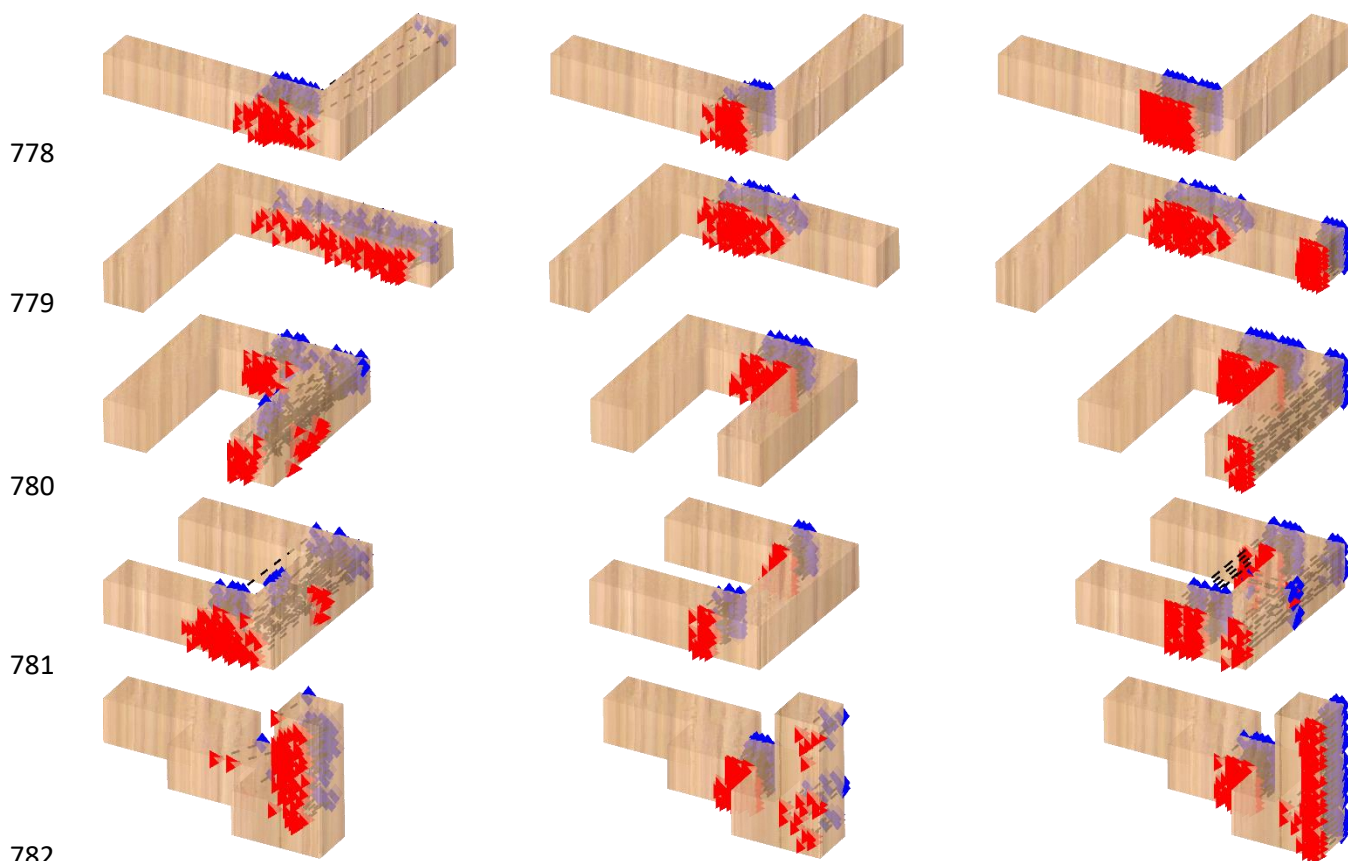

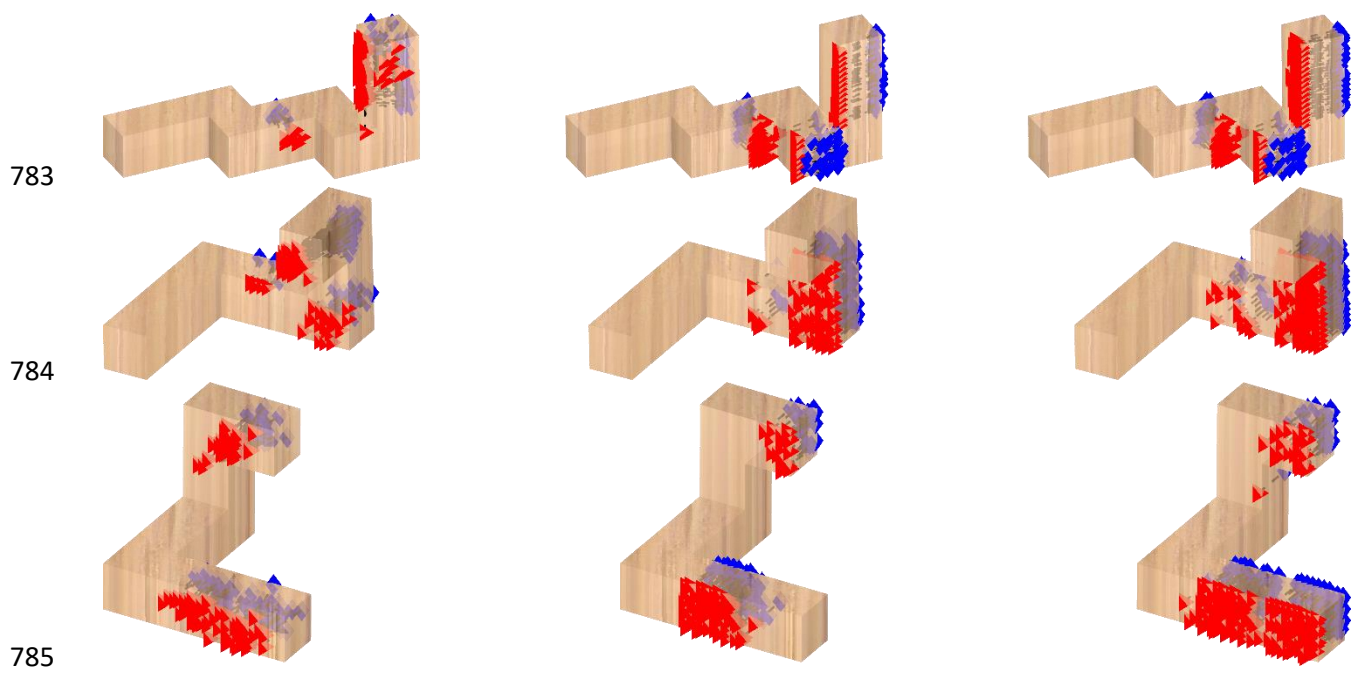

787 (b) Experiment 2

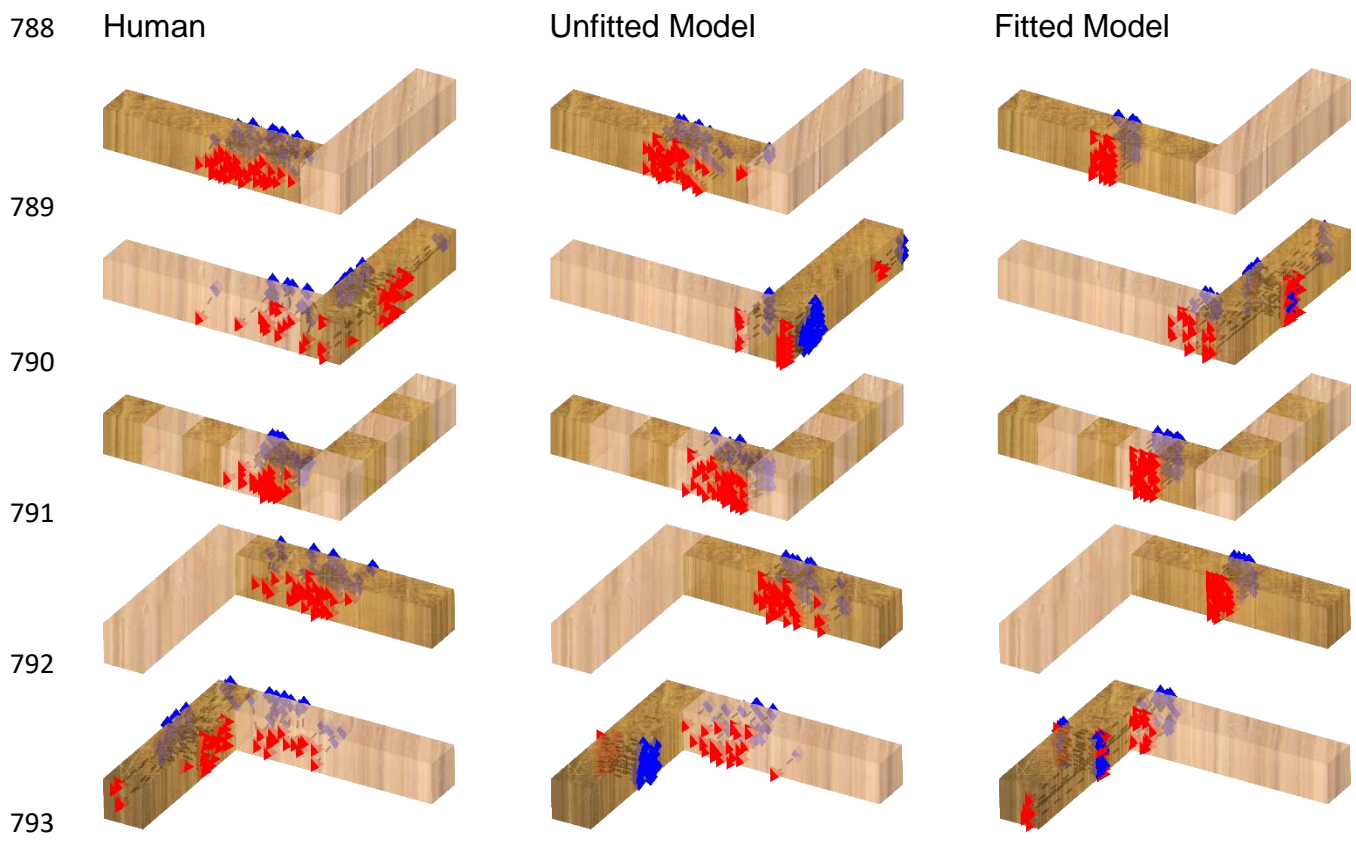

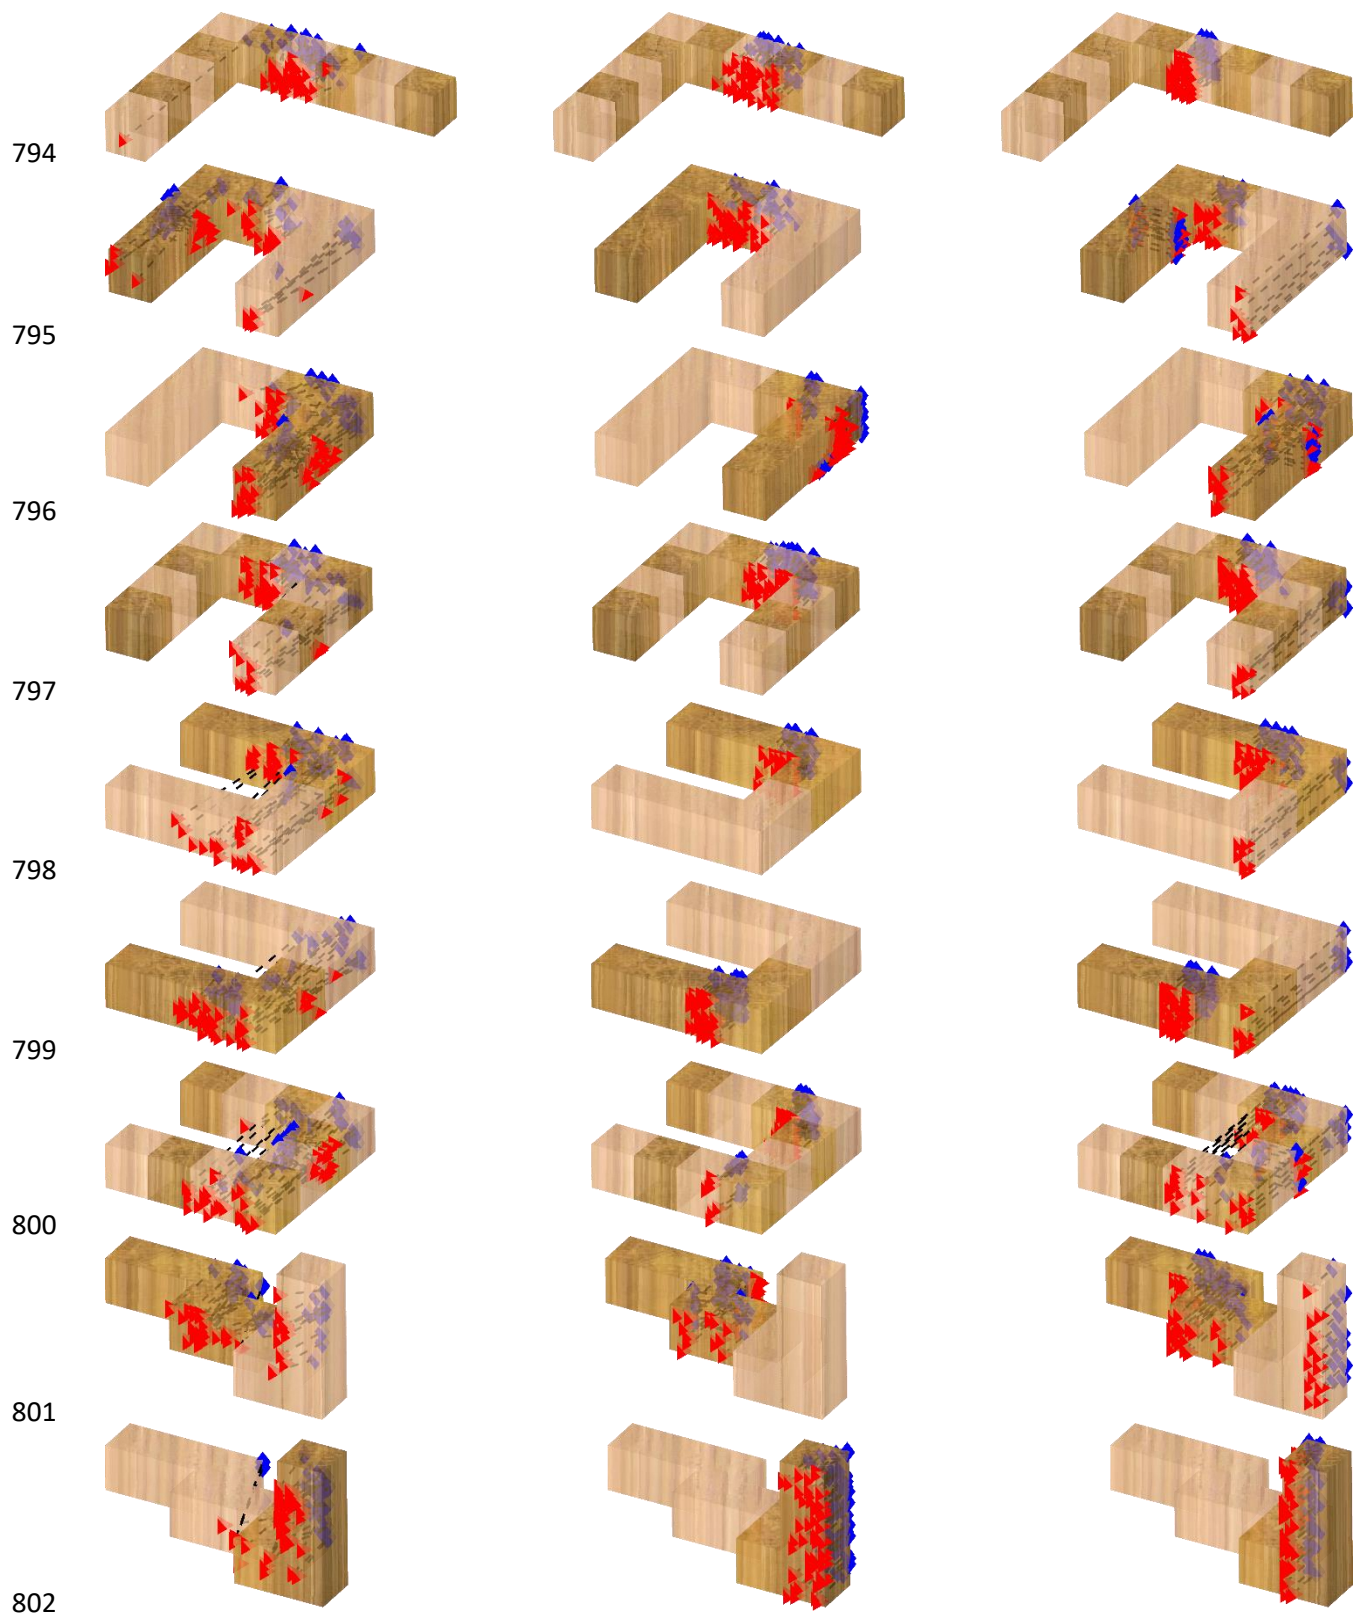

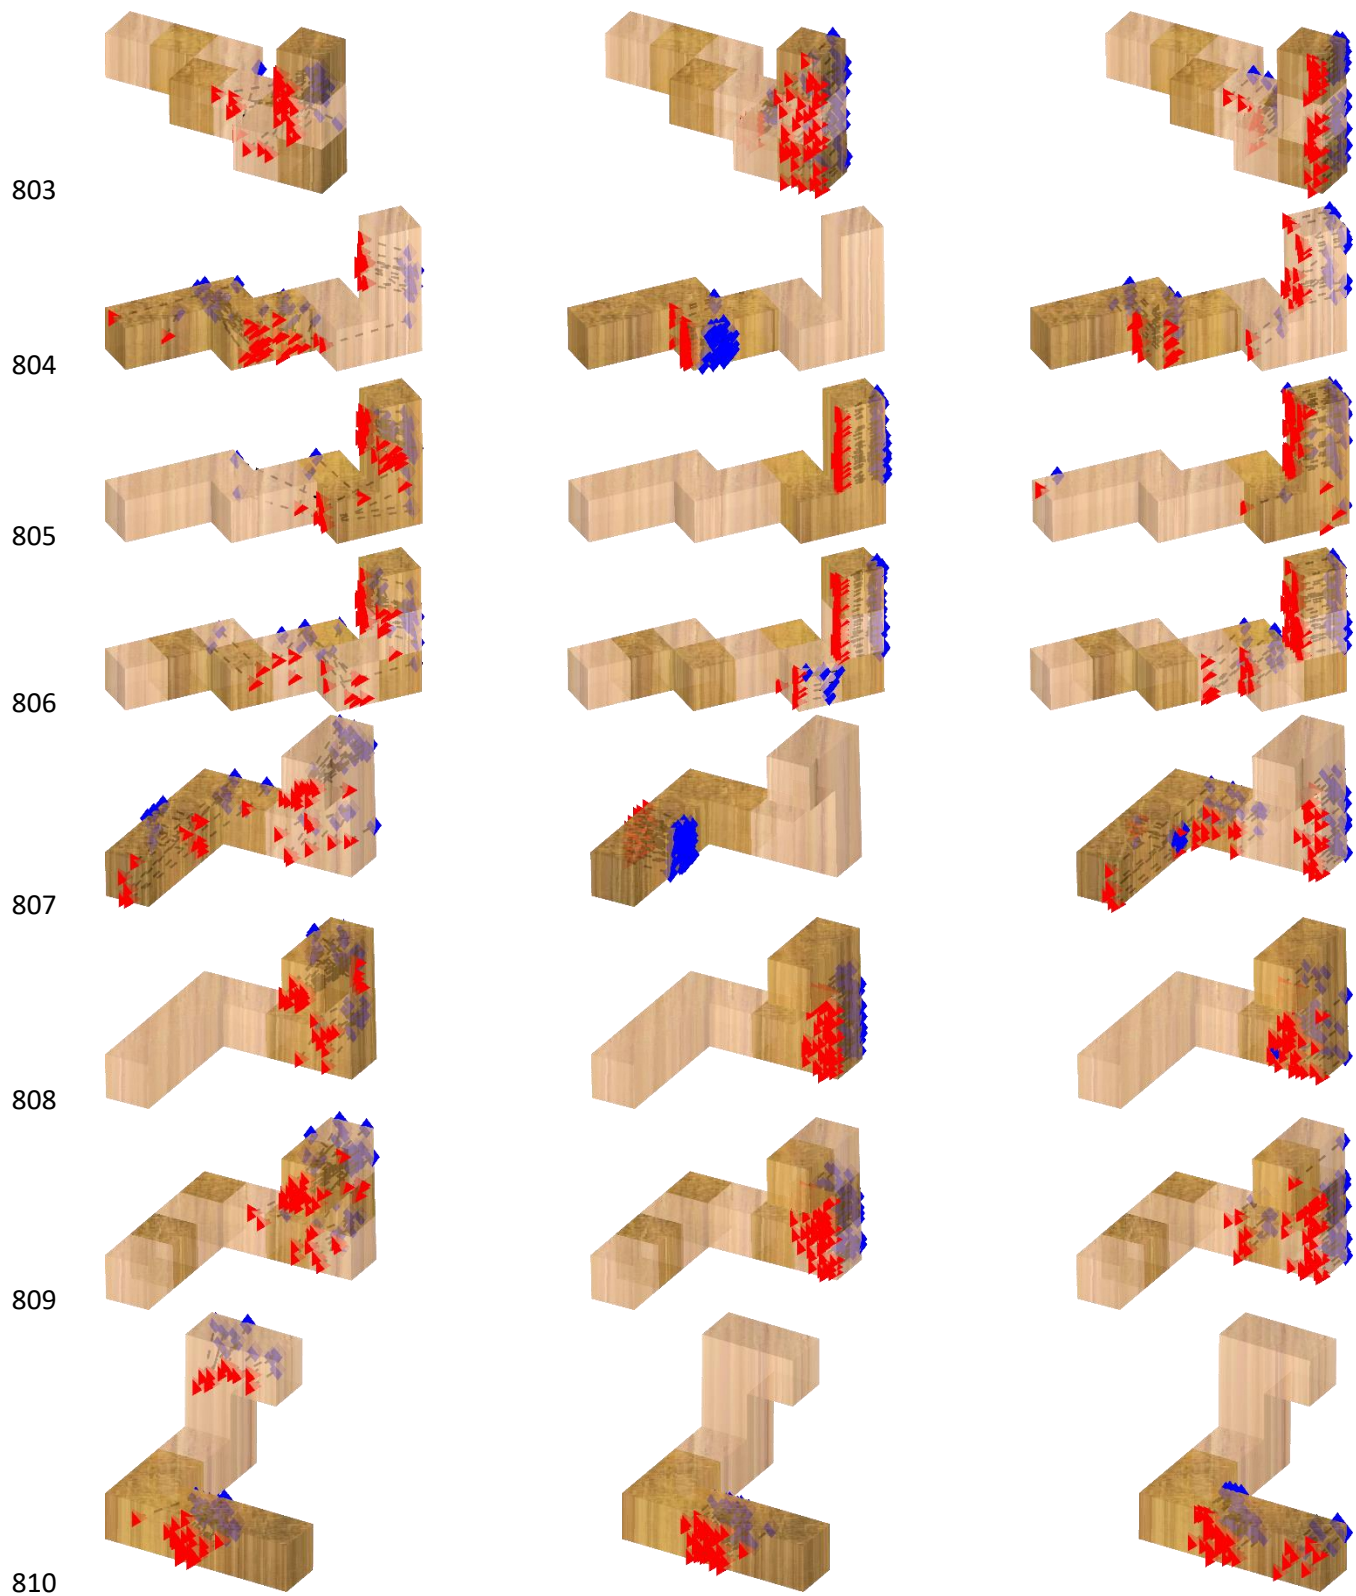

811

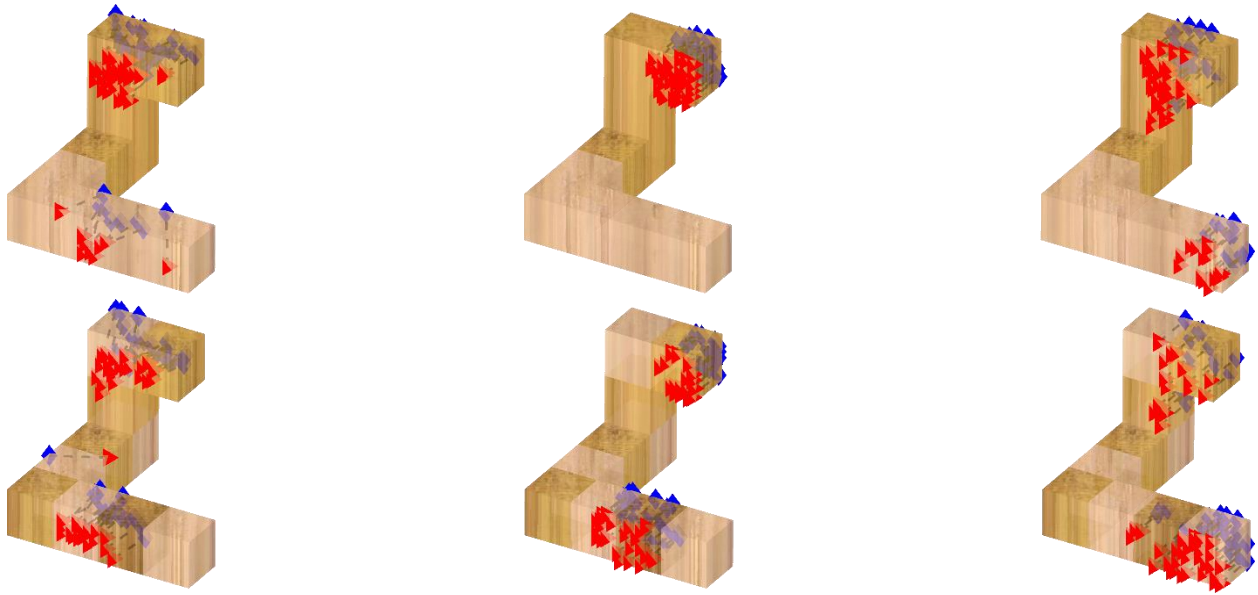

812

813 **Figure S1.** Grasping patterns from human participants (left), unfitted model (middle), and fitted  
814 model (right). (a) Grasping patterns on wooden objects from Experiment 1. (b) Grasping  
815 patterns on mixed material objects from Experiment 2.

816

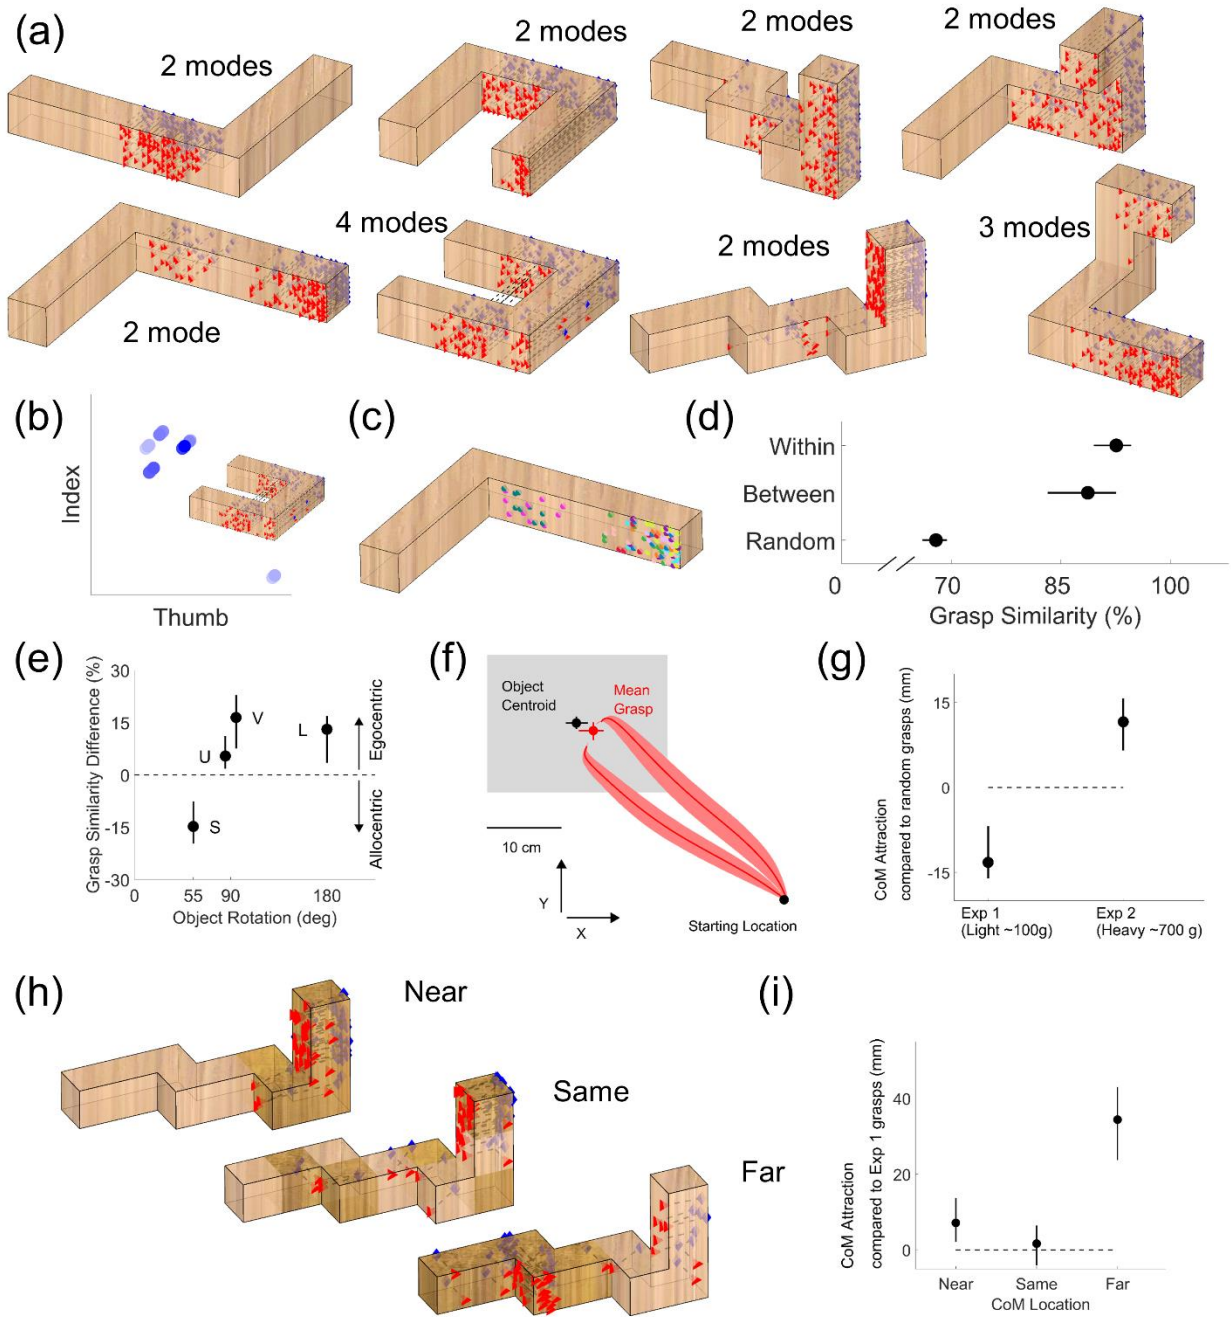

817

818 **Figure S2.** Pattern of empirical results recreated from simulating grasps from the fitted  
 819 computational model. All panels are the same as in Figure 3 of the main manuscript, except that  
 820 the data are simulated from the model. Only the grasp trajectories in panel (f) are from the  
 821 human data, to highlight how the model correctly reproduces the biases in human grasping  
 822 patterns.

823
