Title:

***Predicting precision grip grasp locations on three-dimensional objects***

Authors:

Lina K. Klein <sup>a,†</sup>, Guido Maiello <sup>a,†,\*</sup>, Vivian C. Paulun <sup>a</sup>, Roland W. Fleming <sup>a,b</sup>

<sup>a</sup> Department of Experimental Psychology, Justus Liebig University Giessen, Giessen 35394, Germany

<sup>b</sup> Center for Mind, Brain and Behavior, Justus Liebig University Giessen, Giessen 35394, Germany

\* Corresponding Author:

Guido Maiello

Department of Experimental Psychology, Justus Liebig University Giessen, Otto-  
Behagel-Str.10F, Giessen 35394, Germany

Email: [guido\\_maiello@yahoo.it](mailto:guido_maiello@yahoo.it)

† joint first authors; these authors contributed equally to this work

Keywords:

Grasping | Visual Grasp Selection | Precision Grip | Shape | Material

Author Contributions:

LKK, GM, VCP and RWF conceived and designed the study. LKK collected the data. LKK and GM analyzed the data. GM developed the computational model of grasp selection. All authors wrote the manuscript.

## 1 **Abstract**

2 We rarely experience difficulty picking up objects, yet of all potential contact points on the  
3 surface, only a small proportion yield effective grasps. Here, we present extensive behavioral  
4 data alongside a normative model that correctly predicts human precision grasping of unfamiliar  
5 3D objects. We tracked participants' forefinger and thumb as they picked up objects of 10 wood  
6 and brass cubes configured to tease apart effects of shape, weight, orientation, and mass  
7 distribution. Grasps were highly systematic and consistent across repetitions and participants.  
8 We employed these data to construct a model which combines five cost functions related to  
9 force closure, torque, natural grasp axis, grasp aperture, and visibility. Even without free  
10 parameters, the model predicts individual grasps almost as well as different individuals predict  
11 one another's, but fitting weights reveals the relative importance of the different constraints. The  
12 model also accurately predicts human grasps on novel 3D-printed objects with more naturalistic  
13 geometries and is robust to perturbations in its key parameters. Together, the findings provide a  
14 unified account of how we successfully grasp objects of different 3D shape, orientation, mass,  
15 and mass distribution.

16

## 17 **Author Summary**

18 A model based on extensive behavioral data unifies the varied and fragmented literature on  
19 human grasp selection by correctly predicting human grasps across a wide variety of conditions.

20

## 21 Introduction

22 In everyday life, we effortlessly grasp and pick up objects without much thought.  
23 However, this ease belies the computational complexity of human grasping. Even state of the  
24 art robotic AIs fail to grip objects nearly 20% of the time(1). To pick something up, our brains  
25 must work out which surface locations will lead to stable, comfortable grasps, so we can  
26 perform desired actions (Figure 1a). Most potential grasps would actually be unsuccessful, e.g.,  
27 requiring thumb and forefinger to cross, or failing to exert useful forces (Figure 1b). Even many  
28 possible grasps would be unstable, e.g., too far from the object's center, so it rotates when lifted  
29 (Figure 1c). Somehow, the brain must infer which, of all potential grasps, would actually  
30 succeed. Despite this, we rarely drop objects or find ourselves unable to complete actions  
31 because we are holding them inappropriately. How does the brain select stable, comfortable  
32 grasps onto arbitrary 3D objects, particularly objects we have never seen before?

33

(a) possible

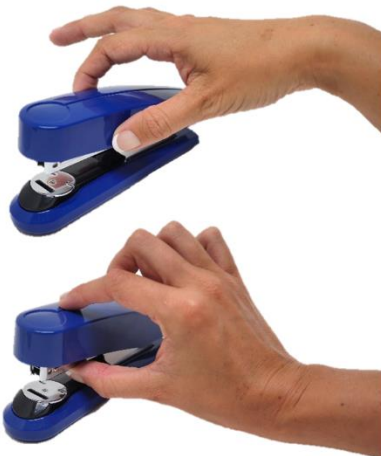

(b) impossible

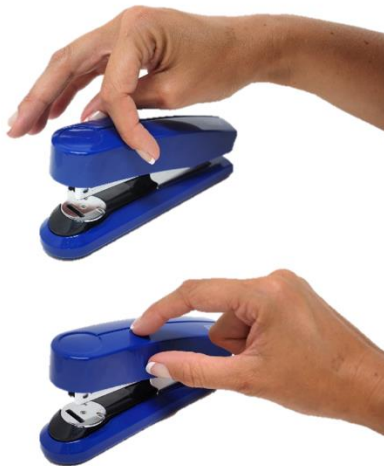

(c) unstable

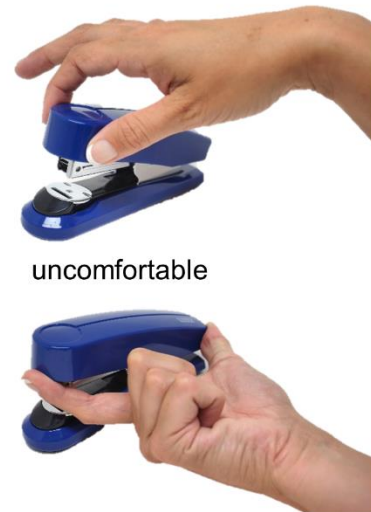

34

35 **Figure 1.** The computational complexity of human grasp selection. **(a)** Possible **(b)** Impossible  
36 **(c)** Possible but uncomfortable or unstable grasps.

37

38           Despite the extensive literature describing human grasping patterns, movement  
39 kinematics, and grip force adjustments (2–14), little is understood about the computational basis  
40 of initial grasp selection. Few authors have attempted to study and model how humans select  
41 grasps (e.g. (15, 16)), and even then, only for 2D shapes. This is because, even for two-digit  
42 precision grip, many factors influence grasping. Object shape must be considered, since the  
43 surface normals at contact locations must be approximately aligned (a concept known as force  
44 closure(17)), otherwise the object will slip through our fingertips (Figure 1b, bottom). Object  
45 mass and mass distribution must be evaluated, since for grips with high torques (i.e. far from the  
46 center of mass, CoM(18–22)) the object will tend to rotate under gravity and potentially slip out  
47 of our grasp (Figure 1c, top). The orientation(19, 22–25) and size(26) of grasps on an object  
48 must be considered, since the arm and hand can move and apply forces only in specific ways.  
49 Grasps that do not conform to the natural configuration of our hand in 3D space might be  
50 impossible (Figure 1b, top), or uncomfortable (Figure 1c, bottom). The hand’s positioning may  
51 also determine an object’s visibility(9, 27–30).

52           Most previous research did not assess the relative importance of these factors, nor how  
53 they interact. Here we sought to unify these varied and fragmented findings into a single  
54 normative framework. We therefore constructed a rich dataset in which we could tease apart  
55 how an object’s 3D shape, mass, mass distribution, and orientation influence grasp selection.  
56 We devised a set of objects made of wood and brass cubes in various configurations (Figure 2),  
57 and asked participants to pick them up with a precision grip, move them a short distance and  
58 place them at a target location, while we tracked their thumb and forefinger. We measured initial  
59 contact locations (i.e. not readjusted contact regions during movement execution). By varying  
60 the shapes and orientation of the objects in Experiment 1, we (i) determined how consistent at  
61 selecting grasp locations participants are with themselves and other people, and (ii) measured  
62 the interactions between allocentric 3D shape and egocentric perspective on those shapes. If  
63 actors take the properties of their own effectors into account (e.g., hand orientation, grasp size),

64 we should expect the same shape to be grasped at different locations depending on its  
65 orientation relative to the observer(19). In Experiment 2, we varied the mass and mass  
66 distribution of the objects (Figure 2c) to test the relative role of 3D shape and mass properties. If  
67 participants take torques into account, identical shapes with different mass distributions should  
68 yield systematically different grasps(18, 20–22).

69 Next, we employed this rich dataset to develop a computational model to predict human  
70 grasp patterns. We reasoned that grasps are selected to minimize costs associated with  
71 instability and discomfort. Accordingly, we implemented a model that combines five factors  
72 computed from the object's shape, mass distribution, and orientation: (i) force closure(17), (ii)  
73 torque(18–22) (iii) natural grasp axis(19, 23–25), (iv) natural grasp aperture for precision  
74 grip(26) and (v) visibility(27, 28). The model takes as input a near-veridical 3D mesh  
75 representation of an object to be grasped, performs free-body computations on the mesh, and  
76 outputs minimum-cost, optimal grasp locations on the object. We found that the optimal grasps  
77 predicted by the model matched human grasp patterns on the wooden and brass polycube  
78 objects from Experiments 1 and 2 strikingly well. We then employed the model to generate  
79 predictions regarding where humans should grasp novel shapes with curved surfaces. In a final  
80 Experiment 3, we had participants grasp these novel 3D-printed, curved, plastic objects. Human  
81 grasps well aligned with the model predictions. Finally, we employed these data to show that  
82 model predictions are robust to perturbations in the model input and key parameters.

83

## 84 **Results:**

### 85 ***Experiment 1: 3D shape and orientation***

86 **Human grasps are tightly clustered and represent a highly constrained sample from the**  
87 **space of potential grasps.** Twelve participants grasped four objects made of beech wood  
88 presented at two orientations (*Figure 2a,b*; see **Methods**). Figure 3a shows how grasp patterns  
89 tend to be highly clustered. In each condition, different grasps have similar sizes (finger-to-

90 thumb distance) and orientations, and also cover the same portions of the objects. Fitting  
91 multivariate Gaussian mixture models to the responses reveals that grasps cluster around only  
92 1, 2, or 3 modes. Figure 3b shows three distinct modes for object U at orientation 2 in a unitless  
93 2D representation of grasp space. Human grasps cover only a minute portion of the space of  
94 potential grasps. Note that we define the space of potential grasps as the set of all combinations  
95 of thumb and index finger positioning attemptable on the accessible surfaces of an object (i.e.,  
96 those not in contact with the table). Figure 3c also shows how, for one representative condition,  
97 different grasps from the same subjects are more clustered than grasps from different subjects,  
98 since individuals predominantly selected only one (70%) or two (27%) modes, and only rarely  
99 (3%) grasped objects in three separate locations.

100

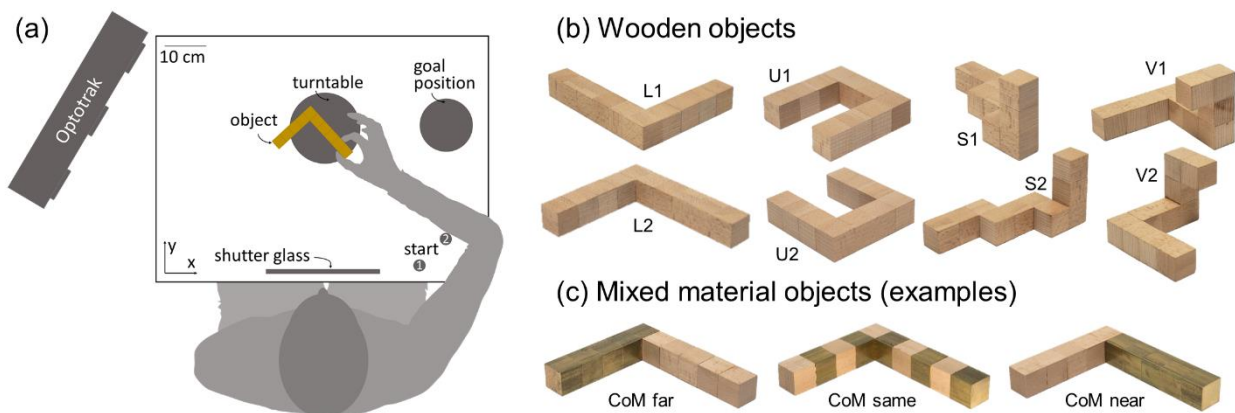

101  
102 **Figure 2.** Setup and stimuli for Experiments 1 and 2. **(a)** Experimental setup. Seated  
103 participants performed grasping movements with their right hand. Following an auditory signal  
104 (coinciding with the shutter window turning transparent) they moved from one of the starting  
105 positions to the object and grasped it with a precision grip. They transported and released the  
106 object at the goal position and returned to the start position. **(b)** In Experiment 1 we employed  
107 four objects made of wooden cubes. Each object had a unique shape (that here we name L, U,  
108 S, V) and was presented at one of two different orientations with respect to the participant. **(c)** In

109 *Experiment 2 the objects had the same shapes as in Experiment 1, but now were made of wood*  
110 *and brass cubes. The brass and wood cubes were organized either in an alternate pattern*  
111 *(middle), so that the CoM of the object would remain approximately the same as for the wooden*  
112 *object, or grouped so that the CoM would be shifted either closer to (right) or away from (left)*  
113 *the participant's hand starting location.*

114

115 To further quantify how clustered these grasping patterns are we designed a simple  
116 metric of similarity between grasps (see **Methods**). Figure 3d shows how both between- and  
117 within-subject grasp similarity are significantly higher than the similarity between random grasps  
118 only constrained by accessible object geometry ( $t(7)=9.96$ ,  $p=2.2*10^{-5}$  and  $t(7)=26.15$ ,  
119  $p=3.1*10^{-8}$  respectively). Additionally, within-subject grasp similarity is significantly higher than  
120 between subjects ( $t(7)=3.89$ ,  $p=0.0060$ ). Nevertheless, the high similarity between grasps from  
121 different participants demonstrates that different individuals tend to grasp objects in similar  
122 ways. The even higher level of within-subject grasp similarity further demonstrates that grasp  
123 patterns from individual participants are idiosyncratic, which may reflect differences in the  
124 strategies employed by individual participants, or may be related to physiological differences in  
125 hand size, strength, or skin slipperiness. We observe no obvious learning effects across trial  
126 repetitions: between-subject grasp similarity does not change from first to last repetition across  
127 objects and orientations ( $t(7)=0.62$ ,  $p=0.56$ ).

128

129



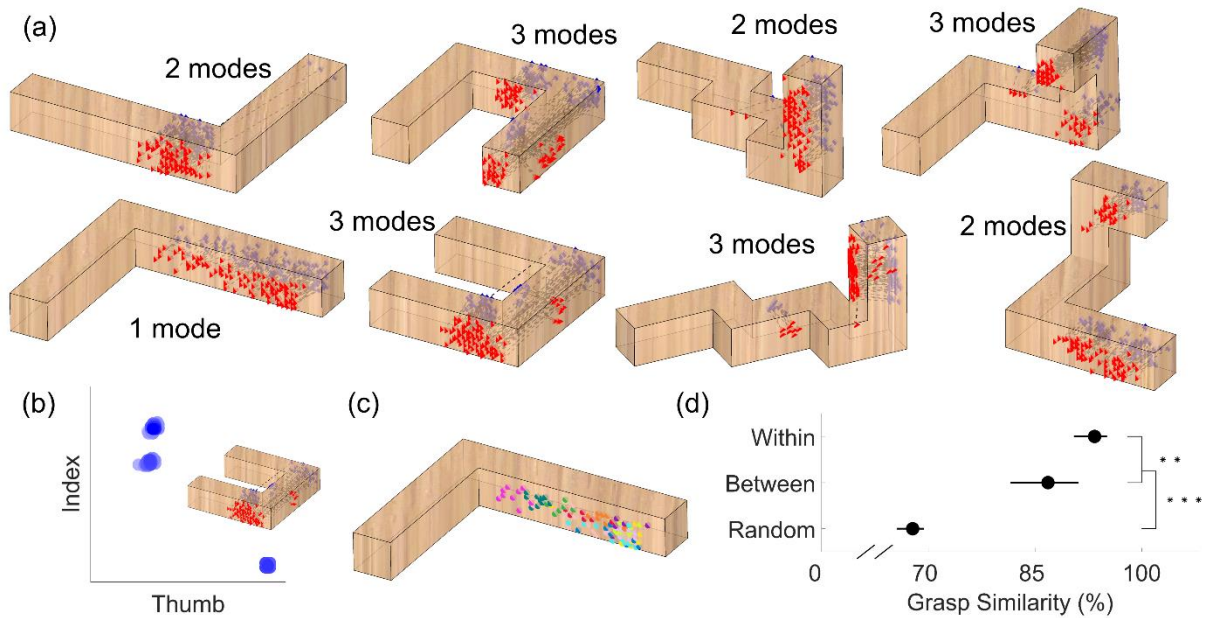

130

131 **Figure 3.** Human grasps are clustered. (a) Human grasps from Experiment 1. Grasps are  
132 represented as thumb (red triangles) and index finger (blue diamonds) contact positions,  
133 connected by dotted black lines. (b) Human grasps (blue blobs) for object U, orientation 2, when  
134 projected in a unitless 2D representation of the space of potential grasps, cluster around three  
135 distinct modes. (c) Distribution of thumb contact points on object L, orientation 2. Different  
136 colors represent grasps from different participants. (d) The level (%) of grasp similarity expected  
137 for grasps randomly distributed on the object surface (i.e. random combinations of thumb and  
138 index finger positioning attemptable on an object) and the observed level of between- and  
139 within-participant grasp similarity, averaged across objects and orientations. Error bars are 95%  
140 bootstrapped confidence intervals of the mean. \*\*  $p < 0.01$ , \*\*\*  $p < 0.001$

141

142 **Findings reproduce several known effects in grasp selection.** Previous research suggests  
143 haptic space is encoded in both egocentric and allocentric coordinates(31), and that grasps are  
144 at least partly encoded in egocentric coordinates to account for the biomechanical constraints of  
145 our arm and hand(19). Our findings reproduce and extend these observations. If humans



146 selected grasps in allocentric coordinates tied to an object's 3D shape, then grasps onto the  
147 same object in different orientations should be located on the same portions of the object but in  
148 different 3D world coordinates. Conversely, if actors take their own effectors into account, they  
149 should grasp objects at different locations depending on the object's orientation. For each object  
150 we computed grasp similarity across the two orientations in both egocentric (tied to the  
151 observer) and allocentric coordinates (tied to the object). Figure 4a shows that, as the extent of  
152 the object rotation increases, grasp encoding shifts from allocentric to egocentric coordinates.  
153 Across small rotations (object S, 55 degree rotation), grasps are more similar if encoded in  
154 allocentric coordinates ( $t(11)=13.90$ ,  $p=2.5 \cdot 10^{-8}$ ), whereas for large rotations (object L, 180  
155 degrees) grasps are more similar if encoded in egocentric coordinates ( $t(11)=4.59$ ,  $p=7.8 \cdot 10^{-4}$ ).  
156 Therefore, both 3D shape as well as movement constraints influence grasps.  
157

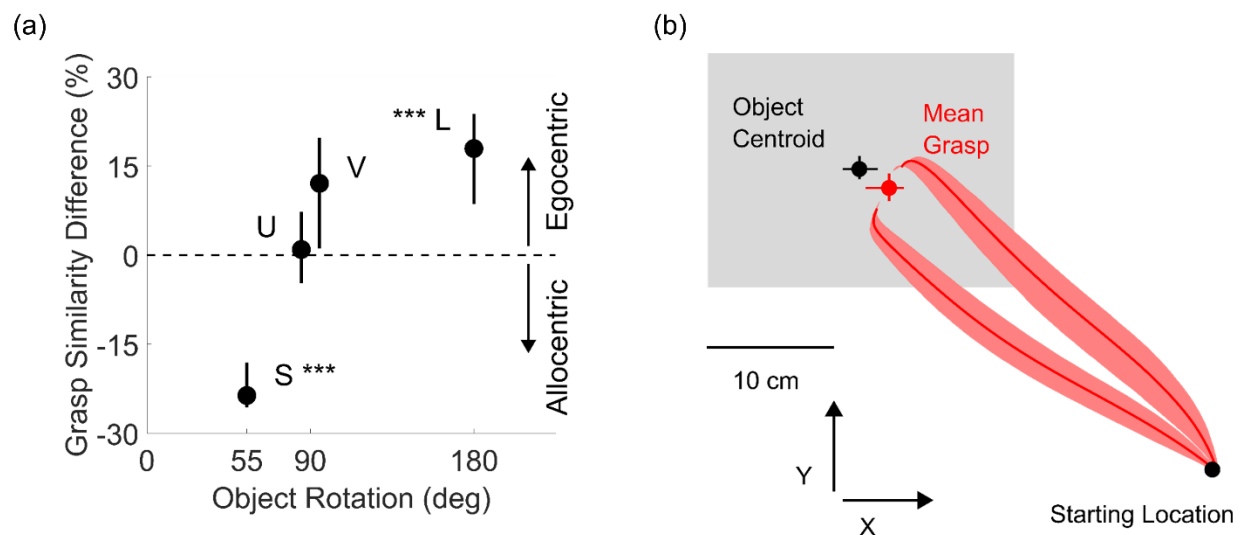

158  
159 **Figure 4. Spatial encoding and bias. (a)** Difference in grasp similarity across orientations when  
160 grasps were encoded in object-centered (allocentric) vs human-centered (egocentric)  
161 coordinates, as a function of magnitude of rotation across the two orientation conditions. **(b)**  
162 Average grasp trajectories viewed in the x-y plane (red curves) from start location towards the  
163 objects (always contained within the gray shaded region). The average human grasp (red dot)

164 *across conditions is biased toward shorter reaching movements compared to the object*  
165 *centroids (black dot). In both panels data are means, error bars/regions represent 95%*  
166 *bootstrapped confidence intervals. \*\*\*  $p < 0.001$*

167

168 Figure 4b shows that participants also selected grasps that were on average 26 mm  
169 closer to the starting location than the object centroid ( $t(11)=9.74$ ,  $p=9.6 \times 10^{-7}$ ), reproducing  
170 known spatial biases in human grasp selection (15, 28, 30, 32, 33).

171 Consistent with Kleinholdermann et al. (15) but contrary to previous claims(18–22), our  
172 findings suggest humans care little about torque when grasping lightweight objects (of ~100 g).  
173 If actors sought to minimize torque, the selected grasps should be as close as possible to the  
174 CoM. Conversely, if participants were to disregard torque, then grasps should be at least as  
175 distant from the CoM as grasps randomly selected on the surface of the object. Figure 5a plots  
176 the difference between the CoM distance of participant grasps and the average CoM distance of  
177 random grasps, which we name ‘CoM attraction compared to random grasps’. In Experiment 1,  
178 grasps were on average 9 mm farther from the CoM than the average distance to the object’s  
179 CoM of grasps uniformly sampled onto the surface of the objects ( $t(11)=4.53$ ,  $p=8.6 \times 10^{-4}$ ). This  
180 negative value means that participants grasped the objects towards their extremities, farther  
181 from the CoM than even random chance.

182

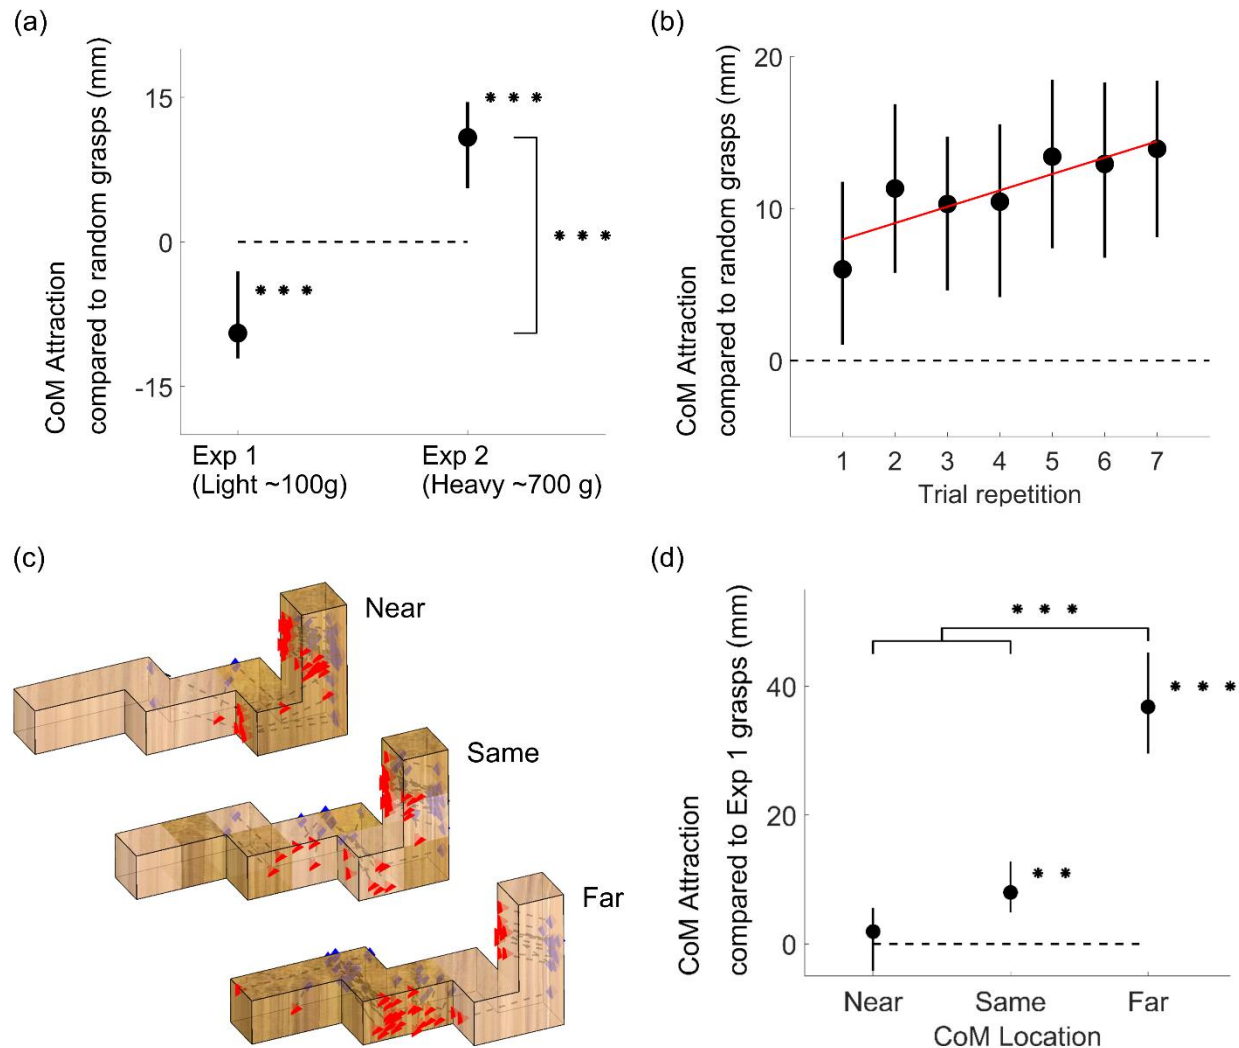

183

184 **Figure 5. Mass and Mass Distribution.** (a) Attraction towards the object CoM for grasps  
 185 executed onto light (Experiment 1) and heavy (Experiment 2) objects compared to the average  
 186 CoM distance of grasps uniformly distributed on the object surfaces (zero reference). (b)  
 187 Attraction towards the object CoM in Experiment 2 as a function of trial repetition. Red line is the  
 188 best-fitting regression line through the data (c) Human grasps from Experiment 2 onto object S  
 189 presented at orientation 2. (d) Attraction towards the object CoM compared to Experiment 1  
 190 grasps (zero reference), for Experiment 2 grasps onto heavy objects whose CoM is closer, the  
 191 same distance as, or farther than the light wooden objects from Experiment 1. In panels a, b,

192 and  $d$ , data are means, error bars represent 95% bootstrapped confidence intervals. \*\*  $p < 0.01$ ,  
193 \*\*\*  $p < 0.001$

194

## 195 **Experiment 2: Mass and Mass Distribution**

### 196 **Humans grasp objects close to their center of mass when high grip torques are possible**

197 **and instructions demand the object does not rotate.** Due to the low density of beech wood,

198 even the grasps farthest from the CoM in Experiment 1 would produce relatively low torques.

199 Therefore, in Experiment 2 we tested whether participants grasp objects closer to the CoM

200 when higher torques are possible. We did this by using objects of greater mass and asymmetric

201 mass distributions. Specifically, for each of the shapes in Experiment 1, we made three new

202 objects, each made of five brass and five wooden cubes: two 'bipartite' objects, with brass

203 clustered on one or the other half of the object, and one 'alternating' object, with brass and

204 wood alternating along the object's length. These objects had the same 3D shapes as in

205 Experiment 1, but were nearly tenfold heavier (Figure 2c, see **Methods**).

206 Figure 5a shows how human grasps are indeed significantly attracted towards the CoM

207 of heavy objects, presumably to counteract the larger torques associated with higher mass. In

208 Experiment 2, grasps were on average 11 mm closer to the object CoM than grasps sampled

209 uniformly from the objects' surfaces ( $t(13)=4.89$ ,  $p=2.9 \times 10^{-4}$ ), and on average 20 mm closer

210 than the grasps from Experiment 1 ( $t(24)=6.60$ ,  $p=8.0 \times 10^{-7}$ ). Figure 5b shows how this behavior

211 was evident already from the very first trial performed by participants, but also that grasps

212 clustered more toward the object CoM in later trials, presumably as participants refined their

213 estimates of CoM location (correlation between CoM attraction and trial repetition:  $r=0.86$ ,  $p=$

214  $0.13$ ). Importantly, participants shifted their grasps towards the CoM—not the geometrical

215 centroid—of the objects (observe how the grasp patterns shift in Figure 5c). Figure 5d shows

216 that when the object CoM was shifted towards the hand's starting location, participants did not

217 significantly adjust their grasping strategy compared to Experiment 1 ( $t(13)=0.81$ ,  $p=0.43$ ).

218 Conversely, when the object CoM was in the same position as in Experiment 1, grasps shifted  
219 on average by 8 mm towards the CoM ( $t(13)=3.92$ ,  $p=0.0017$ ). When the CoM was shifted away  
220 from the hand's starting position, grasps were on average 37 mm closer to the CoM compared  
221 to Experiment 1 ( $t(13)=8.49$ ,  $p=1.2 \cdot 10^{-6}$ ), a significantly greater shift than both the near and  
222 same CoM conditions ( $t(13)=8.66$ ,  $p=9.2 \cdot 10^{-7}$  and  $t(13)=7.58$ ,  $p=4.0 \cdot 10^{-6}$ ). These differential  
223 shifts indicate that participants explicitly estimated each object's CoM from visual material cues.

224 Even with the heavier objects, participants still systematically selected grasps that were  
225 closer to the starting location than the object centroid ( $t(13)=4.03$ ,  $p=0.0014$ ). However, now  
226 participants exhibited only a 9 mm bias, which was significantly smaller than the 26 mm bias  
227 observed for the light wooden objects in Experiment 1 ( $t(24)=4.67$ ,  $p=9.6 \cdot 10^{-5}$ ).

228 Together these findings suggest that participants combine multiple constraints to select  
229 grasp locations, taking into consideration the shape, weight, orientation, and mass distribution of  
230 objects, as well as properties of their own body to decide where to grasp objects. We next  
231 sought to develop a unifying model that could predict these diverse effects based on a few  
232 simple underlying principles.

233

### 234 ***Normative model of human grasp selection.***

235 Based on the insights gained from our empirical findings, we developed a model to  
236 predict human grasp locations. The model takes as input 3D descriptions of the objects' shape,  
237 mass distribution, orientation, and position relative to the participant, and computes as output a  
238 *grasp cost function*, describing the costs associated with every possible combination of finger  
239 and thumb position on accessible surface locations (i.e., those not in contact with table). We  
240 reasoned that humans would tend to grasp objects at or close to the minima of this cost  
241 function, as these would yield the most stable, comfortable grasps. Low cost grasps can then be  
242 projected back onto the object to compare against human grasps. It is important to note that this  
243 is not intended as a process model describing internal visual or motor representations (i.e., we

244 do not suggest that the human brain explicitly evaluates grasp cost for all possible surface  
245 locations). Rather, it is a normative model for predicting which grasps are optimal under a set of  
246 pre-defined constraints. It provides a single, unifying framework based on a subset of the factors  
247 that are known to influence human grasp selection (15).

248 For each object, we create a triangulated mesh model in a 3D coordinate frame, from  
249 which we can sample (Figure 6a-b). For precision grip, we assume one contact point each for  
250 thumb and index finger. Thus, all possible precision grip grasps can be ordered on a 2D plane,  
251 with all possible thumb contact points along the x-axis, and on the y-axis, all possible index  
252 contacts in the same ordering as for the thumb.

253

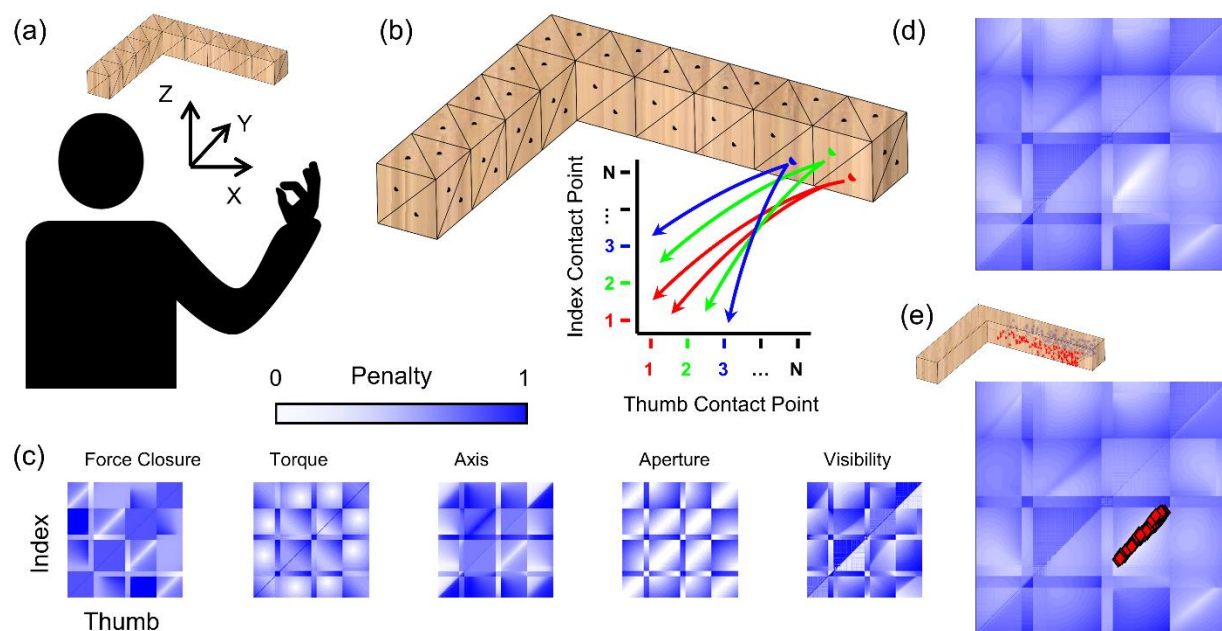

254

255 **Figure 6.** A framework that unifies distinct aspects of grasp selection. (a) Mesh model of object  
256 in same 3D reference frame as participant poised to execute grasp. (b) Discrete sampling of the  
257 reachable surface defines a 2D space containing all potential combinations of index and thumb  
258 contact points on the object. (c) Color-coded maps showing penalty values for each potential  
259 grasp for each penalty function. (d) Overall penalty function computed as the linear combination



260 of maps in (c). **(e)** Human grasps projected into 2D penalty-function space neatly align with  
261 minimum of combined penalty map.

262

263 To estimate the cost associated with each grasp, we take the combination of five *penalty*  
264 *functions*, determined by the object's physical properties (surface shape, orientation, mass,  
265 mass distribution) as well as constraints of the human actuator (i.e. the human arm/hand).

266 Specifically, we consider optimality criteria based on: (i) optimum force closure(17), (ii) minimum  
267 torque(18–22), (iii) alignment with the natural grasp axis(19, 23–25), (iv) optimal grasp  
268 aperture(26), and (v) optimal visibility(27, 28, 30). (see **Methods** for mathematical definitions).

269 Figure 6c shows maps for each penalty function: white indicates low penalty, dark blue high  
270 penalty. To compare and combine penalty, values are normalized to [0,1].

271 **Force closure:** force closure is fulfilled when the two contact-point surface normals, along  
272 which gripping forces are applied, are directed towards each other(17). Thus, we penalize  
273 lateral offsets between the grasp point normals (Figure 7).

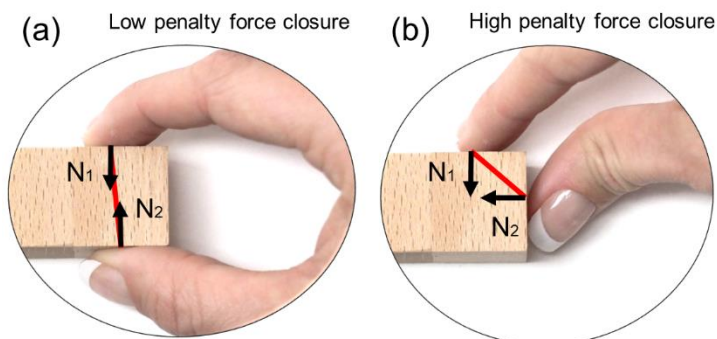

274

275 **Figure 7.** Force Closure. Examples of grasps with **(a)** low penalty and **(b)** high penalty force  
276 closure.

277

278 **Minimum torque:** grasping an object far from its CoM results in high torque, which causes the  
279 object to rotate when picked up(18–22). Large gripping forces would be required to prevent the  
280 object from rotating. We therefore penalize torque magnitude (Figure 8).



281

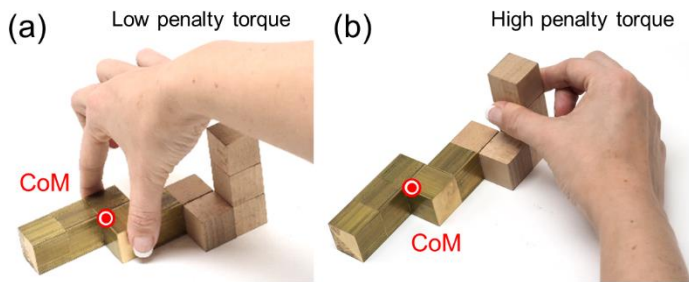

282

283 **Figure 8.** Torque. Examples of grasps with (a) low penalty and (b) high penalty torque.

284

285 **Natural grasp axis:** when executing precision grip grasps, humans exhibit a preferred hand  
286 posture known as the *natural grasp axis* (19, 23–25). Grasps that are rotated away from this axis  
287 result in uncomfortable or restrictive hand/arm configurations (Figure 9). We therefore penalize  
288 angular misalignment between each candidate grasp and the natural grasp axis (taken from  
289 (24)). Unlike force closure and torque, this penalty map is asymmetric about the diagonal:  
290 swapping index and thumb positioning produces the same force closure and torque penalties,  
291 but changes the penalty for the natural grasp axis by 180 degrees.

292

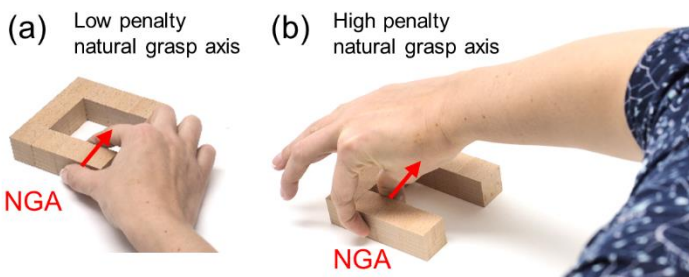

293

294 **Figure 9.** Natural grasp axis. Examples of grasps with (a) low penalty and (b) high penalty  
295 grasp axis.

296

297 **Optimal grasp aperture:** for two-digit precision grips humans prefer the distance between  
298 finger and thumb at contact ('grasp aperture') to be below 2.5 cm(26). We therefore penalize  
299 grasp apertures above 2.5 cm (Figure 10).

300

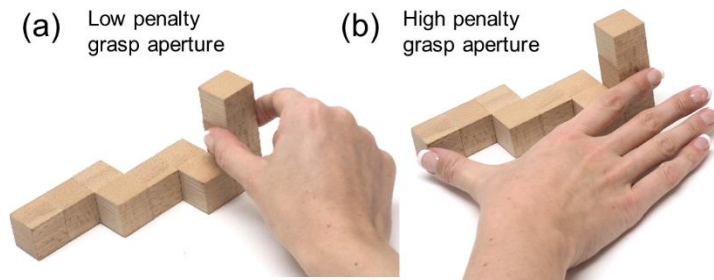

301

302 **Figure 10.** *Optimal grasp aperture. Examples of grasps with (a) low penalty and (b) high*  
303 *penalty aperture.*

304

305 **Optimal visibility:** our behavioral data, and previous studies, suggest humans exhibit spatial  
306 biases when grasping. It has been proposed that these may arise from an attempt to minimize  
307 energy expenditures through shorter reach movements(27). However, Paulun et al. (28) have  
308 shown that these biases may in fact arise from participants attempting to optimize object  
309 visibility. While our current dataset was not designed to untangle these competing hypotheses,  
310 re-analyzing published data (22, 30) confirms that object visibility—not reach length—is most  
311 likely responsible for the biases. We therefore penalized grasps that hindered object visibility  
312 (Figure 11). We also designed a penalty function for reach length and verified that, since reach  
313 length and object visibility are correlated in our dataset, employing one or the other penalty  
314 function yields very similar results.

315

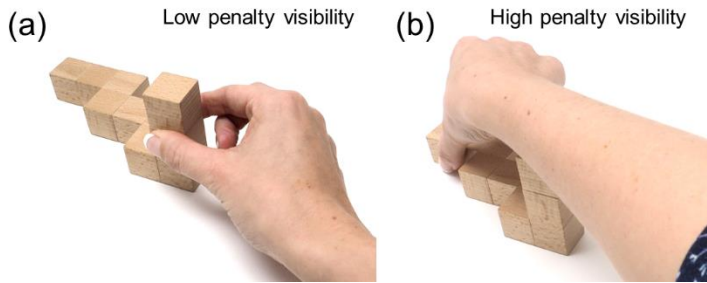

316

317 **Figure 11.** *Optimal visibility. Examples of grasps with (a) low penalty and (b) high penalty*  
318 *visibility.*

319

320 We assume that participants select grasps with low overall costs across all penalty  
321 functions. Thus, to create the overall grasp penalty function, we take the sum of the individual  
322 penalty maps. The minima of this full penalty map represent grasps that best satisfy all criteria  
323 simultaneously. The map in Figure 6d exhibits a clear minimum: the white region in its lower  
324 right quadrant.

325 To assess the agreement between human and optimal grasps, we may visualize human  
326 grasps in the 2D representation of the grasp manifold. The red markers in Figure 6e are the  
327 human grasps from object L at orientation 2, projected in 2D and overlain onto the full penalty  
328 map. Human grasps neatly align with the minima of the penalty map, suggesting that human  
329 grasps are nearly optimal in terms of the cost criteria we use.

330 **Model Fitting.** The simple, equal combination of constraints considered thus far already agrees  
331 with human grasping behavior quite well. However, it is unlikely that actors treat all optimality  
332 criteria as equally important. Different persons likely weight the constraints differently (e.g., due  
333 to strength or hand size). Therefore, we developed a method for fitting full penalty maps to  
334 participants' responses. We assigned variable weights to each optimality criterion, and fit these  
335 weights to the grasping data from each participant, to obtain a set of full penalty maps whose  
336 minima best align with each participant's grasps (see **Methods**).

337

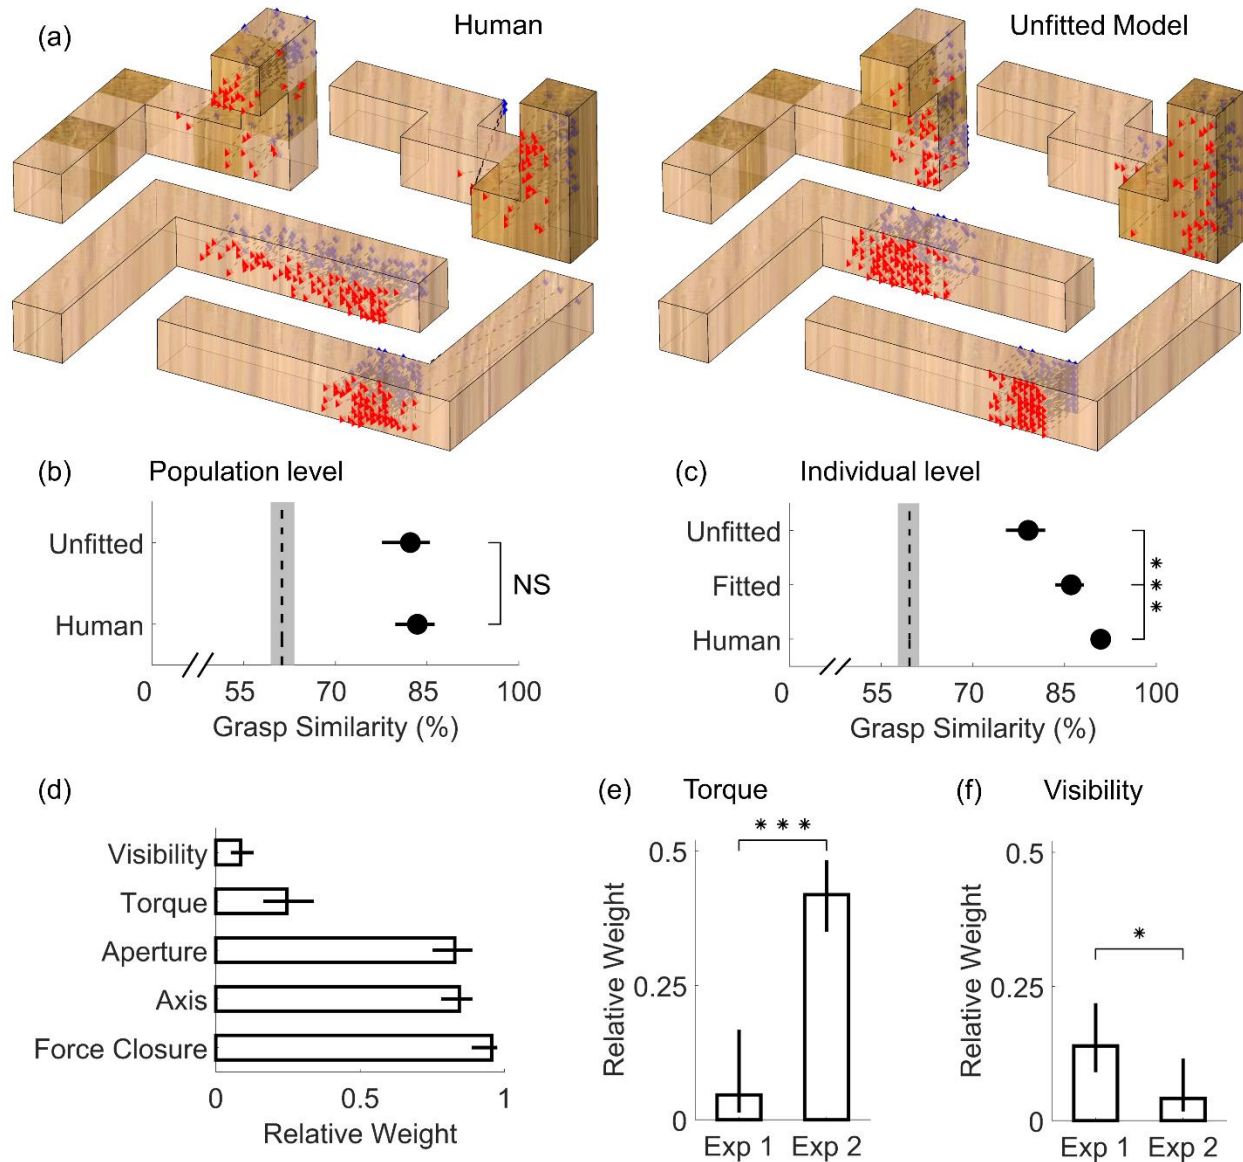

338

339 **Figure 12. Model Results.** (a) Grasping patterns reconstructed through the normative  
 340 framework (right) closely resemble human grasps onto real objects varying in shape,  
 341 orientation, and material (left). Simulated grasp patterns are generated with no knowledge of our  
 342 human data (i.e. model not fit to human grasps). (b) Population level grasp similarity, i.e.  
 343 similarity of human and unfitted model grasps to medoid human grasp across all participants.  
 344 (c) Individual level grasp similarity, i.e. similarity of human, unfitted, and fitted model grasps to  
 345 the medoid grasp of each participant. In panels (b, c), dashed line is estimated chance level of  
 346 grasp similarity due to object geometry, bounded by 95% bootstrapped confidence intervals. (d)

347 *Pattern of fitted weights across Experiments 1 and 2. (e) Relative weight of the minimum torque*  
348 *constraint in Experiments 1 and 2. (f) Relative weight of the visibility constraint in Experiments 1*  
349 *and 2. Data are means; error bars, 95% bootstrapped confidence intervals. \*\*\* $p < 0.001$*

350

351 **Model grasps are nearly indistinguishable from measured human grasps.** To compare  
352 human and optimal grasps directly, we can sample predicted optimal grasps from around the  
353 minimum of the full penalty map (see **Methods**) and project back onto the objects. Figure 12a  
354 shows human grasps (left) and unfitted model predictions (right) on a few representative objects  
355 (see Figure S1 for complete set). Human and predicted grasps have similar size and orientation,  
356 and also cover similar portions of the objects.

357 Figure 12b depicts grasp similarity at the population level, i.e., across participants and  
358 between human and unfitted model grasps. Grasp similarity between participants was computed  
359 (for each object and condition), as the similarity between the medoid grasp of each participant  
360 and the medoid grasp across all others. Grasp similarity between human and model grasps was  
361 computed as the similarity between the medoid unfitted model grasp and the medoid grasp  
362 across all participants.

363 Unfitted model grasps were significantly more similar to human grasps than chance  
364 ( $t(31)=9.34$ ,  $p=1.6 \times 10^{-10}$ ), and effectively indistinguishable from human-level grasps similarity  
365 ( $t(31)=0.53$ ,  $p=0.60$ ). Note that this does not mean our current approach perfectly describes  
366 human grasping patterns; it suggests instead that our framework is able to predict the medoid  
367 human grasping patterns nearly as well as the grasps of a random human on average  
368 approximate the medoid human grasp.

369 **Fitting the model can account for individual grasp patterns.** In both Experiments,  
370 participants repeatedly grasped the same objects in randomized order. Figure 12c depicts how  
371 similar human and model grasps are to the medoid grasp of each individual participant in each  
372 experimental condition. Individual subjects are highly consistent when grasping the same object

373 on separate trials. Grasps predicted through our framework with no knowledge of the empirical  
374 data were significantly less similar to the medoid grasps of individual humans ( $t(31)=9.28$ ,  
375  $p=1.9 \times 10^{-10}$ ). This is unsurprising, since the unfitted model predicts the average pattern across  
376 observers, but there is no mechanism for it to capture idiosyncrasies of individual humans.  
377 Fitting the model to the human data (see **Methods**) significantly improved grasp similarity  
378 ( $t(31)=4.26$ ,  $p=1.8 \times 10^{-4}$ ). Note however that model grasp patterns fit to a single participant are  
379 still distinguishable from random real grasps by the same individual ( $t(31)=4.91$ ,  $p=2.8 \times 10^{-5}$ ).

### 380 **Force closure, hand posture, and grasp size explain most of human grasp point**

381 **selection.** The pattern of fitted weights across both experiments (Figure 12d) reveals the  
382 relative importance of the different constraints. Specifically, we find that force closure is the  
383 most important constraint on human grasping, which makes sense because force closure is a  
384 physical requirement for a stable grasp. Next in importance are natural grasp axis and optimal  
385 grasp aperture, both constraints given by the posture and size of our actuator (our hand). In  
386 comparison, participants appear to care only marginally about minimizing torque, and almost  
387 negligibly about object visibility.

388 **Analyzing the patterns of fitted weights confirms our empirical findings.** The model also  
389 replicates our main empirical findings in a single step. Figure 12e shows that the relative  
390 importance of torque was much greater for the heavy objects tested in Experiment 2 compared  
391 to the light objects from Experiment 1 ( $t(24)=7.93$ ,  $p=3.7 \times 10^{-8}$ ). Conversely, Figure 12f shows  
392 that the relative importance of object visibility instead decreased significantly from Experiment 1  
393 to Experiment 2 ( $t(24)=2.62$ ,  $p=0.015$ ). Additionally, by simulating grasps from the fitted model,  
394 we are able to recreate the qualitative patterns of all behavioral results presented in Figures 3,4  
395 and 5 (see Figure S2).

### 396 ***Experiment 3: Model Validation***

397 To further validate the model, we tested whether the model makes sensible predictions on novel  
398 objects and whether the model is robust to perturbations.



399 **Model Predictions on Novel Objects.** The model was designed from the insights derived from  
400 Experiments 1 and 2 with polycube objects made of brass and wood. To test whether the model  
401 generalizes beyond this type of object, we selected four mesh models of objects with smooth,  
402 curved surfaces from an in-house database (two familiar, two unfamiliar objects). We input  
403 these meshes to the model and generated grasp predictions (Figure 13a). The model was  
404 instantiated using the weights derived from Experiment 1. Next, we 3D printed these objects out  
405 of light plastic (~80g, comparable to Experiment 1 objects), and asked 14 human participants to  
406 grasp these novel objects. Figure 13b shows how human grasps agree with model predictions.  
407 Human and model grasps once again have similar size and orientation, and also cover similar  
408 portions of the objects. Figure 13c confirms this observation: predicted model grasps are as  
409 similar to medoid human grasps as grasps from a random human participant ( $t(13)=1.21$ ,  
410  $p=0.25$ ).

411

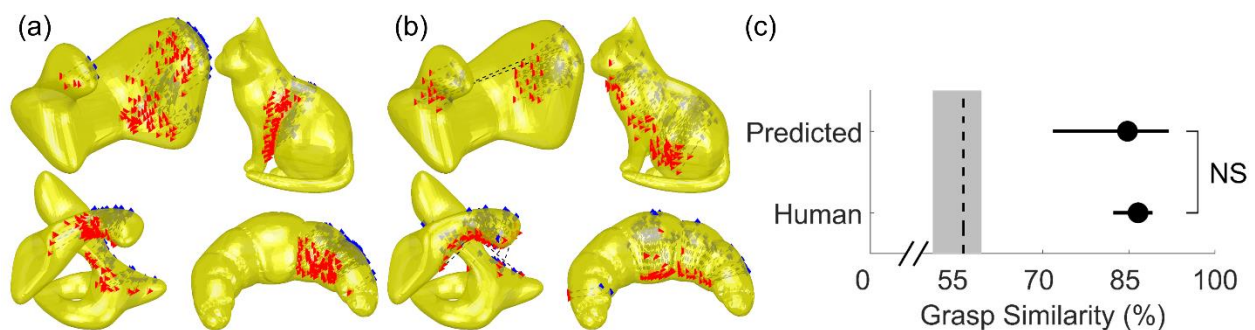

412

413 **Figure 13.** Model predictions for novel objects align with human grasps. (a) Grasping patterns  
414 predicted through the normative framework for novel objects with smooth and curved surface  
415 geometry. (b) Human grasps onto 3D printed versions of the objects align with model  
416 predictions. (c) Similarity of human and predicted model grasps to medoid human grasp across  
417 objects and participants. Dashed line is estimated chance level of grasp similarity, bounded by  
418 95% bootstrapped confidence intervals.

419



420 **Model Perturbation Analysis.** The model designed thus far receives as input a near-veridical  
421 representation of the objects to grasp. However, it is unlikely that humans have access to such  
422 a veridical object representation. We therefore implemented some perturbations to the inputs  
423 and key parameters of the model and observed how robust the model is to these perturbations.  
424 Specifically, we tested how model performance in predicting human grasping patterns from  
425 Experiment 3 varies as a functions of these perturbations.

426 The model input thus far consisted of densely sampled 3D mesh models. It's unlikely  
427 that humans also have such a dense, accurate 3D representation of an object's surface. Figure  
428 14a therefore shows model performance (in terms of similarity with human grasping patterns)  
429 with different levels of surface mesh subsampling. Model performance is robust to relatively high  
430 levels of subsampling, and decreases only once sampled surface locations are on average  
431 more than 4 mm distant from one another (below 5% mesh subsampling).

432 Since the backside of objects is occluded from view, it is unlikely that participants have  
433 an accurate estimate of the required grip aperture across the whole object. Additionally, since  
434 we constrained participants to two-digit precision grips, grasps above the threshold defined by  
435 Cesari and Newell (26) might be acceptable, as long as these are within a maximum  
436 comfortable grasp span. Figure 14b shows that indeed model performance is robust to  
437 increases in aperture threshold up to 100 mm.

438 Similarly, humans might also exhibit some tolerance for grasps oriented away from the  
439 natural grasp axis. Given that the ease of a rotation of the arm and hand is likely asymmetric  
440 along different directions, these tolerances likely also vary depending on rotation direction.  
441 Figure 14c shows how model performance does indeed decrease for perturbations of the  
442 natural grip axis along the transverse plane, and this decrease is more steep for clockwise  
443 (negative) rotations, as already suggested by Kleinholdermann and colleagues(15). Model  
444 performance is instead more robust to perturbations along the sagittal plane (Figure 14d), and

445 particularly for (positive) counterclockwise rotations in which the thumb tilts below the index  
 446 finger.  
 447

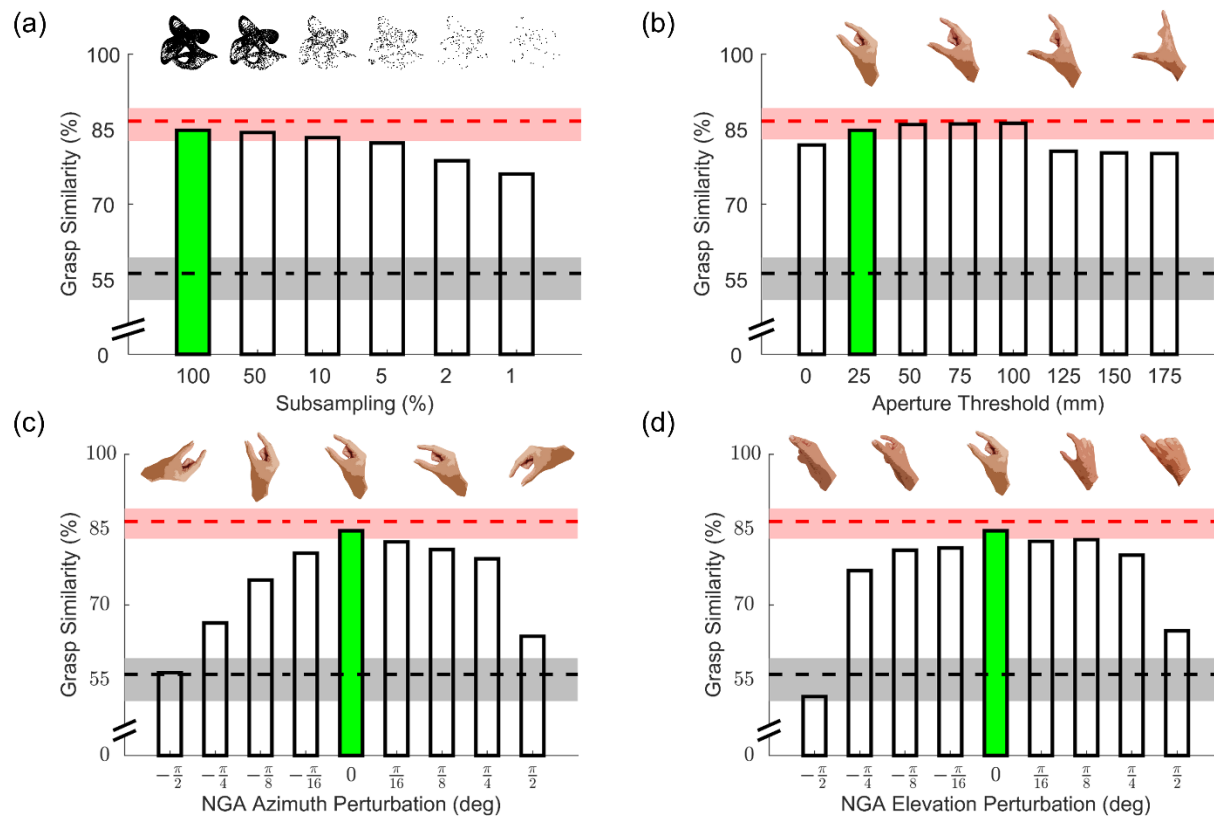

448  
 449 **Figure 14. Perturbation Results.** All panels show model performance (in terms of grasp  
 450 similarity to human data from Experiment 3) as a function of different perturbations. Grasp  
 451 similarity for the original model implementation is shown in green. Red and black dashed lines  
 452 are respectively human and chance levels of grasp similarity, bounded by 95% bootstrapped  
 453 confidence intervals. **(a)** Model grasp similarity with input meshes subsampled by varying  
 454 degrees. **(b)** Model grasp similarity for model implementations employing increasing aperture  
 455 thresholds. **(c, d)** Model grasp similarity for models implemented with deviated natural grasp  
 456 axis along the transverse (c) and sagittal (s) planes.

457

458

## 459 **Discussion**

460 We investigated how an object's 3D shape, orientation, mass, and mass distribution jointly  
461 influence how humans select grasps. Our empirical analyses showed that grasping patterns are  
462 highly systematic, both within and across participants, suggesting that a common set of rules  
463 governs human grasp selection of complex, novel 3D objects. Our findings reproduce, unify,  
464 and generalize many effects observed previously: (i) both 3D shape and orientation determine  
465 which portion of the object people grasp (8, 15, 18, 19, 34–37).; (ii) humans exhibit spatial  
466 biases even with complex 3D objects varying in shape and mass(15, 28, 30, 32, 33); (iii) object  
467 weight modulates how much humans take torque into account when selecting where to grasp  
468 objects(18–22). We then combined this diverse set of observations into a unified theoretical  
469 framework that predicts human grasping patterns strikingly well, even with no free parameters.  
470 By fitting this normative model to human behavioral data, we showed that force closure, hand  
471 posture, and grasp size are the primary determinants of human grasp selection, whereas torque  
472 and visibility modulate grasping behavior to a much lesser extent. We further demonstrated that  
473 the model is able to generate sensible predictions for novel objects and is robust to  
474 perturbations.

475 **3D Shape** Behavioral research on the influence of shape on grasping is surprisingly scarce,  
476 primarily employs 2D or simple geometric 3D stimuli of uniform materials, and rarely  
477 investigates grasp selection (8, 18, 19, 34–37). For example, by using 3D stimuli that only  
478 varied in shape by a few centimeters, Schettino et al. (36) concluded that object shape  
479 influences hand configuration only during later phases of a reaching movement during which  
480 subjects use visual feedback to optimize their grasp. Here, we show that distinct 3D shapes are  
481 grasped in systematically distinct object locations, and our behavioral and model analyses can  
482 predict these locations directly from the object 3D shape.

483 **Orientation** When grasping spheres or simple geometrical shapes, humans exhibit a preferred  
484 grasp orientation (the NGA) (19, 23–25), and most previous work on how object orientation

485 influences grasping has primarily focused on hand kinematics (18, 22, 35, 38). Conversely, with  
486 more complex 3D shapes we show that the same portion of an object is selected within a range  
487 of orientations relative to the observer, whereas for more extreme rotations the grasp selection  
488 strategy shifts significantly. Therefore, object shape and orientation together determine which  
489 portion of an object will be grasped, and thus the final hand configuration.

490 **Spatial Biases** The spatial biases we observe are consistent with participants attempting to  
491 increase object visibility (28, 30), and our data also replicate the finding that these biases are  
492 reduced when object weight increases (22, 28).

493 **Material/Weight/Torque** Goodale et al. (18) were among the first to show that participants tend  
494 to grasp objects through their CoM, presumably to minimize torque. Lederman and Wing (19)  
495 found similar results, yet in both studies low-torque grasps also correlated with grasps that  
496 satisfied force closure and aligned with the natural grasp axis. Kleinholdermann et al. (15) found  
497 torque to be nearly irrelevant in grasp selection, yet Paulun et al. (22) observed that grasp  
498 distance to CoM was modulated by object weight and material. More recent work by Paulun et  
499 al. has further shown that participants are fairly accurate at visually judging the location of the  
500 CoM even for bipartite objects made of two different materials (39). Our findings resolve these  
501 conflicting findings. By using stimuli that decorrelate different aspects of grasp planning, we find  
502 that shape and hand configuration are considerably more important than torque for light weight  
503 objects, and that the importance of minimizing torque scales with mass. Additionally, shifting an  
504 object's mass distribution significantly attracted grasp locations towards the object's shifted  
505 CoM, demonstrating that participants could reliably combine global object shape and material  
506 composition to successfully infer the object's CoM.

507 **Modelling Grasp Selection** Previous models of grasping have mainly focused on hand  
508 kinematics and trajectory synthesis (2–6) whereas we attempt to predict which object locations  
509 will be selected during grasping. Our modelling approach takes inspiration from  
510 Kleinholdermann et al. (15), which to the best of our knowledge is the only previous model of

511 human two-digit contact point selection, but only for 2D shape silhouettes. In addition to dealing  
512 with 3D objects varying in mass, mass distribution, orientation, and position, our modeling  
513 addresses several limitations of previous approaches. The fitting procedure quantifies the  
514 relative importance of different constraints, and can be applied to any set of novel objects to test  
515 how experimental manipulations affect this relative weighting. Additionally, while model fitting  
516 significantly improved the similarity between model and individual participant grasps, the  
517 agreement was not perfect. This suggests that grasp planning may involve additional,  
518 undiscovered constraints, which our approach would be sensitive enough to detect. The  
519 modular nature of the model specifically allows additional constraints to be included, excluded  
520 or given variable importance. For example, we know that end-state comfort of the hand plays a  
521 role in grip selection (40, 41), yet the tradeoff between initial and final comfort is unclear (42). By  
522 varying the participants' task to include object rotations, and by including a penalty function  
523 penalizing final hand rotations away from the natural grasp axis, it would be possible to assess  
524 the relative importance of initial, final (or indeed intermediate) hand configurations on grasp  
525 planning. Relatedly, the effect of obstacles (and self-obstacles, such as the vertically protruding  
526 portions of some of the objects employed in this study) could also be assessed. The presence  
527 of obstacles could affect grasp selection by requiring reach-to-grasp trajectories that avoid an  
528 obstacle, although previous research has shown that forcing different hand paths does not  
529 affect selected grasp locations (25). Alternatively, the presence of obstacles might alter the  
530 configuration of the arm and hand during a grasp (43), which could be incorporated into the  
531 model by modifying the grip comfort penalties.

532 Previous literature has also shown that object surface properties such as curvature (13),  
533 tilt (14), and friction (44, 45) modulate the fingertip forces employed during grasping. While the  
534 current study was not designed to examine how these factors influence grasp selection, the  
535 current model is already able to predict grasp patterns for objects with curved surfaces, even if  
536 not perfectly. Model performance with these objects could likely be improved by including into

537 our framework penalty functions that take into account local surface structure and friction.  
538 Incorporating friction into the model could even improve model performance for our composite  
539 objects from Experiment 2, as wood and brass may have different friction coefficients. Since  
540 surface friction plays a decisive role in determining force closure, friction coefficients could even  
541 be directly integrated into the force closure computations. Friction is also a particularly  
542 interesting test case for our assumption of a weighted linear combination of costs, as it may  
543 interact with other factors. When friction is low, it could cause the cost of torque to be  
544 upregulated, to avoid slipping (22). This would require the addition of parameters describing  
545 interactions between factors. Alternatively, friction and torque might be unified into a single  
546 penalty function capturing the magnitude of grip force required to avoid slippage. However,  
547 incorporating friction into the model would be non-trivial, since the coefficient of friction between  
548 skin and different materials depends on several factors, including temperature, hydration, and  
549 age (46).

550 The model should also be extended to multi-digit grasping, by adding to each penalty  
551 function three dimensions for each additional finger considered (the x,y,z coordinates of the  
552 contact point). This approach is consistent with (and complementary to) the approach by  
553 Smeets and Brenner (2, 5), who posit that grasping is a combination of multiple pointing  
554 movements. Given that human participants adjust the number of digits they employ to grasp an  
555 object depending on grip size and object weight (26), multiple size/weight thresholds could be  
556 employed to determine the preferred multi-digit grip. Future models should also generalize from  
557 contact points to contact patches of nonzero area, as real human grasp locations are not only  
558 points but larger areas of contact between digit and object. To facilitate such developments, we  
559 provide all data and code (doi upon acceptance).

560 **Neuroscience of Grasping** While our model is not intended as a model of brain processes,  
561 there are several parallels with known neural circuitry underlying visual grasp selection (for  
562 reviews see (47–49)). Of particular relevance is the circuit formed between the Ventral Premotor

563 Cortex (Area F5), Dorsal Premotor Cortex (Area F2), and the Anterior Intraparietal Sulcus (AIP).  
564 Area F5 exhibits 3D-shape-selectivity during grasping tasks and is thought to encode grip  
565 configuration given object shape (50–52), whereas area F2 encodes the grip-wrist orientation  
566 required to grasp objects under visual guidance (53). Both regions exhibit strong connections  
567 with AIP, which has been shown to represent the shape, size, and orientation of 3D objects, as  
568 well as the shape of the handgrip, grip size, and hand-orientation (54). Additionally, visual  
569 material properties, including object weight, are thought to be encoded in the ventral visual  
570 cortex (55–59), and it has been suggested that AIP might play a unique role in linking  
571 components of the ventral visual stream involved in object recognition to hand motor system  
572 (60). Therefore, the neural circuit formed between F5, F2, and particularly AIP is a strong  
573 candidate for combining the multifaceted components of visually guided grasping identified in  
574 this work (61–65). Combining targeted investigations of brain activity with the behavioral and  
575 modelling framework presented here holds the potential to develop a unified theory of visually  
576 guided grasp selection.

577

## 578 **Materials and Methods:**

### 579 ***Participants***

580 Twelve naïve participants (5 males and 7 females between the ages of 20 and 31, mean age:  
581 25.2 years) participated in Experiment 1. A different set of fourteen naïve participants (9 males  
582 and 5 females between the ages of 21 and 30, mean age: 24.4 years) participated in  
583 Experiment 2. An additional, different set of fourteen naïve participants (5 males and 9 females  
584 between the ages of 19 and 58, mean age: 25.1 years) participated in Experiment 3.  
585 Participants were students at the Justus Liebig University Giessen, Germany and received  
586 monetary compensation for participating. All participants reported having normal or corrected to  
587 normal vision and being right handed. All procedures were approved by the local ethics board



588 and adhered to the declaration of Helsinki. All participants provided written informed consent  
589 prior to participating.

### 590 ***Apparatus***

591 Experiments 1 and 2 were programmed in Matlab version R2007a using the Optotrak Toolbox  
592 by V. H. Franz (66). Participants were seated at a table with their head positioned in a chinrest  
593 (Figure 2a), in front of an electronically controlled pane of liquid crystal shutter glass (67),  
594 through which only part of the table was visible and which became transparent only for the  
595 duration of a trial. Objects were placed at a target location, 34 cm from the chinrest in the  
596 participant's sagittal plane. Small plastic knobs placed on participants' right side specified the  
597 hand starting positions. A plate (28.5 cm to the right of the target location and with a 13 cm  
598 diameter at 26 cm from start position 1 in the participant's sagittal plane) specified the  
599 movement goal location. We tracked participants' fingertip movements with sub-millimeter  
600 accuracy and resolution using an Optotrak 3020 infrared tracking system. The Optotrak  
601 cameras were located to the left of the participants. To record index finger and thumb  
602 movement, sets of three infrared markers (forming a rigid body) were attached to the base of  
603 the participants' nails. The fingertip and tip of the thumb were calibrated in relation to the marker  
604 position, as participants grasped a wooden bar with a precision grip, placing their fingertips at  
605 two known locations on the bar.

606 Experiment 3 was programmed in Matlab version R2019b using the Motom Toolbox  
607 (68). Participants were seated at a table with their head positioned in a chinrest and had their  
608 eyes open only for the duration of the movement execution (Figure 15a). Objects were placed at  
609 a target location, 36 cm from the chinrest in the participant's sagittal plane. A piece of tape  
610 placed 30 cm to the right of the chinrest specified the hand starting position. A plate (30 cm to  
611 the right of the target location and with an 18 cm diameter at 30 cm from the start position in the  
612 participant's sagittal plane) specified the movement goal location. We tracked participants'  
613 fingertip movements using an Optotrak Certus infrared tracking system. The Optotrak cameras

614 were located to the left of the participants. To record index finger and thumb movement, sets of  
615 three infrared markers (forming a rigid body) were attached to the base of the participants' nails.  
616 The fingertip and tip of the thumb were calibrated in relation to the marker position, as  
617 participants touched another marker using a precision grip, placing their finger- and thumb tip at  
618 the center of the marker one after the other.  
619

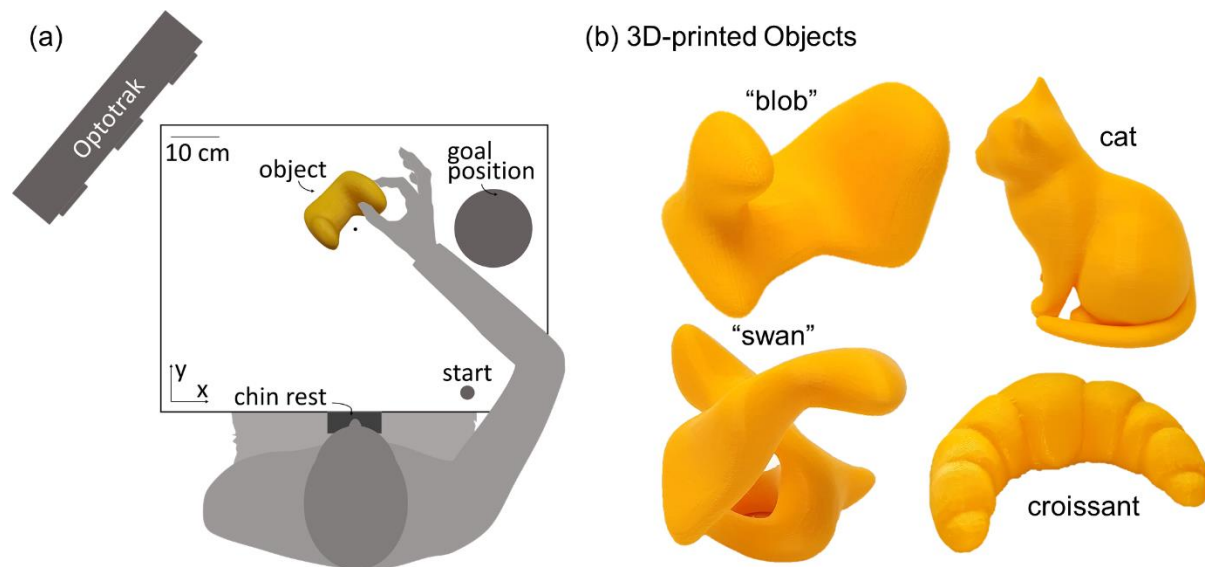

620  
621 **Figure 15.** Setup and stimuli for Experiment 3. (a) Experimental setup. Seated participants  
622 performed grasping movements with their right hand. Following an auditory signal, they opened  
623 their eyes, and moved from the starting position to the object and grasped it with a precision  
624 grip. They transported and released the object at the goal position and returned to the start  
625 position. (b) We employed four 3D-printed objects. Two objects had an abstract shape (that  
626 here we name 'swan' and 'blob'), the other two objects were printed versions of a croissant and  
627 a cat. They were presented to the participant in the orientations displayed in here.

### 628 **Stimuli**

629 **Experiment 1: Light objects made of wood.** Four differently shaped objects (defined as  
630 objects L, U, S and V; Figure 2b) each composed of 10 wooden (beech) cubes ( $2.5^3$  cm<sup>3</sup>),

631 served as stimuli. Objects were fairly light with a mass of 97 g. Two of the objects featured  
632 cubes stacked on top of each other, whereas the other two objects were composed exclusively  
633 of cubes lying flat on the ground. The objects were presented to the participants at one of two  
634 orientations. Across orientations, object L was rotated by 180 degrees, objects U and V were  
635 rotated by 90 degrees, and object S was rotated by 55 degrees. Figure 2b shows the objects  
636 positioned as if viewed by a participant.

637 **Experiment 2: Heavy composite objects made of wood and brass.** For each of the 4 shapes  
638 from Experiment 1, we created 3 new objects (12 in total) to serve as stimuli for Experiment 2  
639 (Figure 2c). Individual cubes were made of either wood or brass. The objects were composed of  
640 5 cubes of each material, which made them fairly heavy with a mass of 716g. By reordering the  
641 sequence of wood and brass cubes, we shifted the location of each shape's CoM. For each  
642 shape we made one object in which brass and wooden cubes alternated with one another, and  
643 two bipartite objects, where the 5 brass cubes were connected to one another to make up one  
644 side of the object with the wooden cubes making up the other side. This configuration was also  
645 inverted, (i.e., wooden and brass cubes switched locations). The 'alternating' objects had  
646 approximately the same CoM as their wooden counterparts (mean  $\pm$  sd distance: 5.1 $\pm$ 2.5 mm).  
647 Conversely, the CoM of bipartite objects was noticeably shifted to one side of the object  
648 compared to their wooden counterparts (mean  $\pm$  sd distance: 33.3 $\pm$ 4.4 mm). The CoM locations  
649 for all stimuli are shown in Supplementary Figure S3. All objects were presented at the same  
650 two orientations as Experiment 1.

651 **Experiment 3: Curved 3D-printed object.** Four novel, differently shaped objects were 3D-  
652 printed. They were made from a yellow plastic with a stabilizing mesh inside. Two objects were  
653 abstract, curved shapes objects (defined as 'swan' (64g) and 'blob' (121g), the other two objects  
654 were known shapes: a cat (72g) and a croissant (74g). All objects were presented to  
655 participants in one orientation, as displayed in Figure 15b.

656 **Object meshes.** For Experiments 1 and 2 triangulated mesh replicas of all objects were created  
657 in Matlab; each cube face consisted of 128 triangles. For Experiment 3 we selected non-uniform  
658 mesh model objects from an in-house database, each mesh consisting of between 4500 and  
659 9000 triangles. To calibrate mesh orientation and position, we measured, using the Optotrak,  
660 four non planar points on each object at each orientation. We aligned the model to the same  
661 coordinate frame employed by the Optotrak using Procrustes analysis.

662

### 663 ***Procedure***

664 **Experiments 1 and 2:** Prior to each trial, participants placed thumb and index finger at a pre-  
665 specified starting location. In Experiment 1, two start locations were used (start 1 at 28 cm to the  
666 right of the chinrest in the participant's coronal plane and 9.5 cm forward in the sagittal plane;  
667 start 2 9 cm further to the right and 3 cm further forward, 23 cm from the center of the goal  
668 plate). Given that we observed no effect of starting position in our data, in Experiment 2 only the  
669 first starting location was employed. When the subject was at the correct start position, the  
670 experimenter placed one of the stimulus objects at the target location behind the opaque shutter  
671 screen. Each object could be presented at one of two orientations with respect to the  
672 participant. The experimenter could very precisely position each object at the correct location  
673 and orientation by aligning two small grooves under each object with two small pins on the table  
674 surface.

675       Once both stimulus and participant were positioned correctly, a tone indicated the  
676 beginning of a trial, at which point the shutter window turned translucent. Participants were then  
677 required to pick up the object using only forefinger and thumb and place it at the goal location.  
678 Participants had 3 seconds to complete the task before the shutter window turned opaque. In  
679 Experiment 1, no instructions were given regarding how the objects had to be transported, yet  
680 we observed that participants never allowed the objects to rotate. Therefore, to match the

681 movement task across experiments, in Experiment 2 participants were instructed to keep the  
682 objects as level as possible.

683 Experiment 1 had sixteen conditions: two starting locations, four wooden objects of  
684 different shapes, each object presented at two orientations. Each participant repeated each  
685 condition five times (eighty trials per participant).

686 Experiment 2 had thirty-six conditions: twelve distinct objects (four shapes in three  
687 material configurations) presented at two orientations. Half of the participants handled only  
688 shapes L and V, the other half handled shapes U and S. Each participant repeated each  
689 condition seven times (eighty-four trials per participant). In both experiments trial order was  
690 randomized.

691 Following each trial, the experimenter visually inspected the movement traces to  
692 determine whether the trial was successful or not. Unsuccessful grasps were marked as error  
693 trials, added to the randomization queue, and repeated.

694 **Experiment 3:** Prior to each trial, participants placed thumb and index finger at the starting  
695 location, closed their eyes, and the experimenter placed one of the stimulus objects at the target  
696 location. The experimenter could precisely position each object by aligning it with its outline,  
697 drawn on millimeter paper. Once both stimulus and participant were positioned correctly, a tone  
698 indicated the beginning of a trial, at which point the participants opened their eyes. Participants  
699 were then required to pick up the object using only forefinger and thumb and place it at the goal  
700 location. Participants had 3 seconds to complete the task. Each participant picked up each  
701 object seven times (28 trials per participant). Trial order was randomized. Following each trial,  
702 the experimenter visually inspected the movement traces to determine whether the trial was  
703 successful or not. Unsuccessful grasps were marked as error trials, and repeated immediately.

704 **Error trials:** A total of 397 error trials (13.8% of trials from Experiment 1, 13.9% from  
705 Experiment 2, and 6.9% from Experiment 3) were not analyzed. Trials were deemed  
706 unsuccessful when participants did not conclude the movement within the allotted time (10.1%

707 of error trials in Experiment 1, 41.4% of error trials in Experiment 2, and 0% in Experiment 3),  
708 and/or when tracking was lost (94.2% of error trials in Experiment 1, 88.7% of error trials in  
709 Experiment 2, and 100% of error trials in Experiment 3), or when participants placed the objects  
710 too hastily on the goal location, which resulted in the objects toppling over off the goal plate  
711 where they were supposed to rest (this occurred only twice throughout the study). Note that  
712 there was some overlap between causes of error. The trajectories of lost-tracking error trials,  
713 where the data are available, fall within the clusters of trajectories of corresponding non-error  
714 trials in 92.2% and 99.0% of cases across Experiments 1 and 2 respectively. In Experiment 3  
715 the experimenter manually recorded grasp locations for error trials, and these locations are all  
716 represented in the final dataset. It is therefore unlikely that excluded error trials differed strongly  
717 from the data included in our analyses.

718

### 719 ***Training***

720 At the beginning of the experiments, each participant completed six practice trials in  
721 Experiments 1 and 2 (using a Styrofoam cylinder in Experiment 1, and by lifting random objects  
722 from the shapes not used in that participant's run in Experiment 2) and five practice trials in  
723 Experiment 3 (using the wooden L-object from Experiment 1). This was done to give  
724 participants a sense for how fast their movement should be in order to complete the entire  
725 movement within three seconds. Prior to Experiment 2, participants were familiarized with the  
726 relative weight of brass and wood using two rectangular cuboids of dimensions 12.5x2.5x2.5  
727 cm, one of wood (50 g) and one of brass (670 g). Practice trial data were not used in analyses.  
728 Prior to Experiment 3, participants were familiarized with the weight of all four test objects by  
729 having each object placed on the flat, extended palm of their right hand.

### 730 ***Analyses***

731 All analyses were performed in Matlab version R2018a. Differences between group means were  
732 assessed via paired or unpaired t-tests, or through Pearson correlation, as appropriate. Values  
733 of  $p < 0.05$  were considered statistically significant.

734 **Contact points.** Contact points of both fingers with the object were determined as the fingertip  
735 coordinates at the time of first contact, projected onto the surface of the triangulated mesh  
736 models of the object. The time of contact with the object was determined using the methods  
737 developed by Schot et al. (69) and previously described in Paulun et al. (22).

738 **Grasp similarity.** We described each individual grasp  $\vec{G}$  as a 6D vector of the x-, y-, z-  
739 coordinates of the thumb and index finger contact points:

$$740 \quad \vec{G} = [x_T, y_T, z_T, x_I, y_I, z_I]$$

741 To compute the similarity  $S$  between two grasps  $\vec{G}_1$  and  $\vec{G}_2$ , we first computed the Euclidian  
742 distance between the two 6D grasp vectors. We then divided this distance by the largest  
743 possible distance between two points on the specific object  $D_{max}$ , determined from the mesh  
744 models of the objects. Finally, similarity was defined as 1 minus the normalized grasp distance,  
745 times 100:

$$746 \quad S = 100 * \left( 1 - \frac{\|\vec{G}_1 - \vec{G}_2\|}{D_{max}} \right)$$

747 In this formulation, two identical grasps, which occupy the same point in a 6D space, will be  
748 100% similar, whereas the two farthest possible grasps onto a specific object will be 0% similar.  
749 Within-subject grasp similarity was the similarity between grasps from the same participant to  
750 the participant's own medoid<sup>1</sup> grasp. Between-subject grasp similarity was the similarity  
751 between the medoid grasp of each participant and the medoid grasp across all other  
752 participants.

---

<sup>1</sup> The medoid (a concept similar to the mean) is the element of a set that minimizes its distance to all other elements. We employ the medoid over the mean because it better represents the grasp data: while the medoid grasp belongs to the set of executed grasps, the mean grasp can result in a grasp that falls inside or outside of the grasped object.



753 **Normative model**

754 The model takes as input 3D meshes of the stimuli and outputs a cost function describing the  
 755 costs associated with every possible combination of finger and thumb position on the accessible  
 756 surface locations of our objects (i.e., those not in contact with the table plane). First, we define  
 757 the center of each triangle in the mesh as a potential contact point. Then, given all possible  
 758 combinations of thumb and index finger contact points  $\overrightarrow{CP_T} = [x_T, y_T, z_T]$ ;  $\overrightarrow{CP_I} = [x_I, y_I, z_I]$ , the  
 759 surface normal at both contact points  $\overrightarrow{n_T} = [x_T^n, y_T^n, z_T^n]$ ;  $\overrightarrow{n_I} = [x_I^n, y_I^n, z_I^n]$ , and the CoM of the  
 760 object  $\overrightarrow{CoM} = [x_{CoM}, y_{CoM}, z_{CoM}]$ , the five penalty functions we combined into a normative model  
 761 of grasp selection were defined as follows:

762 **Force closure.** For two-digit grasping, a grasp fulfills force closure when the grasp axis  
 763 connecting thumb and index contact points lies within the friction cones resulting from the  
 764 friction coefficient between object and digits (17). A grasp that does not fulfill force closure will  
 765 not be able to lift and freely manipulate the object, no matter the amount of force applied at the  
 766 fingertips. A grasp perfectly fulfills force closure when the grasp axis is perfectly aligned with the  
 767 vectors along which gripping forces are applied, which are the opposite of the contact-point  
 768 surface normals. Therefore, we defined the force closure penalty function as the sum of the  
 769 angular deviances (computed using the atan2 function) of the grasp axis from both force vectors  
 770  $\overrightarrow{F_T} = -\overrightarrow{n_T}$ ;  $\overrightarrow{F_I} = -\overrightarrow{n_I}$ :

$$771 \quad P_{FC}(\overrightarrow{CP_T}, \overrightarrow{CP_I}) = \text{atan2}(\|\overrightarrow{F_T} \times (\overrightarrow{CP_I} - \overrightarrow{CP_T})\|, \overrightarrow{F_T} \cdot (\overrightarrow{CP_I} - \overrightarrow{CP_T})) \\ 772 \quad + \text{atan2}(\|\overrightarrow{F_I} \times (\overrightarrow{CP_T} - \overrightarrow{CP_I})\|, \overrightarrow{F_I} \cdot (\overrightarrow{CP_T} - \overrightarrow{CP_I}))$$

773 **Torque.** If a force is applied at some position away from the CoM, the object will tend to rotate  
 774 due to torque, given by the cross product of force vector and lever arm (the vector connecting  
 775 CoM to the point of force application). Under the assumption that is possible to apply forces at  
 776 the thumb and index contact points that counteract the force of gravity  $\overrightarrow{F_g}$ , we can compute the

777 total torque of a grip as the sum of torques exerted by each contact point. Therefore, we defined  
 778 the torque penalty function as the magnitude of the total torque exerted by a grip:

$$779 \quad P_T(\overrightarrow{CP_T}, \overrightarrow{CP_I}) = \|\overrightarrow{CoM} - \overrightarrow{CP_T}\| \times \overrightarrow{-F_g} + \|\overrightarrow{CoM} - \overrightarrow{CP_I}\| \times \overrightarrow{-F_g}\|$$

780 **Natural grasp axis.** Schot, Brenner, and Smeets (24) have carefully mapped out how human  
 781 participants grasp spheres placed at different positions throughout the peripersonal space, and  
 782 provide a regression model that determines the naturally preferred posture of the arm when  
 783 grasping a sphere. We input the configuration of our current experimental setup into the  
 784 regression model developed by these authors, and found the natural grasp axis for our  
 785 participants to be  $\overrightarrow{NGA} = [0.49 \ 0.87 \ 0]$ . We therefore defined the natural grasp axis penalty  
 786 function as the angular deviance from this established natural grasp axis:

$$787 \quad P_{NGA}(\overrightarrow{CP_T}, \overrightarrow{CP_I}) = \text{atan2}(\|\overrightarrow{NGA} \times (\overrightarrow{CP_I} - \overrightarrow{CP_T})\|, \overrightarrow{NGA} \cdot (\overrightarrow{CP_I} - \overrightarrow{CP_T}))$$

788 **Optimal grasp aperture for precision grip.** Cesari and Newell (26) have shown that, when  
 789 free to employ any multi-digit grasp, human participants selected precision grip grasps only for  
 790 cubes smaller than 2.5 cm in length. As cube size increases, humans progressively increase the  
 791 number of digits employed in a grasp. Therefore, since our participants were instructed only to  
 792 employ precision grip grasps, we defined the optimal grasp aperture penalty function as 0 for  
 793 grasp sizes smaller than 2.5 cm, and as a linearly increasing penalty for grasp sizes larger than  
 794 2.5 cm:

$$795 \quad P_{OGA}(\overrightarrow{CP_T}, \overrightarrow{CP_I}) = \begin{cases} 0, & \text{if } \|\overrightarrow{CP_I} - \overrightarrow{CP_T}\| < 25mm \\ \|\overrightarrow{CP_I} - \overrightarrow{CP_T}\| - 25, & \text{if } \|\overrightarrow{CP_I} - \overrightarrow{CP_T}\| > 25mm \end{cases}$$

796 In pilot work, we observed that a penalty map linearly increasing from 0 cm worked equally as  
 797 well as one linearly increasing from 2.5 cm. In Experiment 3 we further observed that increasing  
 798 this threshold up to 10 cm did not hinder model performance. However, constructing this penalty  
 799 function with the 2.5 cm threshold motivated by previous literature will allow us, in future work,

800 to construct penalty functions with multiple thresholds for multi-digit grasping, as those observed  
801 by Cesari and Newell (26).

802 **Object Visibility.** Under the assumption that humans are attempting to minimize the portion of  
803 the objects hidden from view by their hand, we defined the optimal visibility penalty function as  
804 the proportion of object still visible during each possible grasp. We first defined the line on the  
805 XZ plane that passes through the thumb and index finger contact points. We made the  
806 simplifying assumption that, given all possible surface points on the object  $SP_{TOT}$ , the surface  
807 points  $SP_{Occ}(\overrightarrow{CP_T}, \overrightarrow{CP_I})$  that fall to the side of the line where the hand is located will be  
808 occluded. Therefore, the object visibility penalty function was defined as:

$$809 \quad P_{OGA}(\overrightarrow{CP_T}, \overrightarrow{CP_I}) = \frac{Length(SP_{Occ}(\overrightarrow{CP_T}, \overrightarrow{CP_I}))}{Length(SP_{TOT})}$$

810 **Overall grasp penalty function.** To obtain the overall grasp penalty function, each grasp  
811 penalty function was first normalized to the [0 1] range (i.e., across all possible grasps for each  
812 given object, independently of the other objects). Then, we took the sum of the individual  
813 penalty functions:

$$814 \quad P_O(\overrightarrow{CP_T}, \overrightarrow{CP_I}) = P_{FC}(\overrightarrow{CP_T}, \overrightarrow{CP_I}) + P_T(\overrightarrow{CP_T}, \overrightarrow{CP_I}) + P_{NGA}(\overrightarrow{CP_T}, \overrightarrow{CP_I}) + \\ 815 \quad P_{OGA}(\overrightarrow{CP_T}, \overrightarrow{CP_I}) + P_{RT}(\overrightarrow{CP_T}, \overrightarrow{CP_I})$$

816 For display purposes this final function was normalized to the [0 1] range. The minima of this  
817 overall grasp penalty function represent the set of grasps that best satisfy the largest number of  
818 constraints at the same time.

819 **Model fitting.** In both Experiments 1 and 2, human participants executed repeated grasps to  
820 the same objects at each orientation. To fit the overall grasp penalty function to these human  
821 data, for each participant in each condition we first defined a human grasp penalty function  
822  $P_H(\overrightarrow{CP_T}, \overrightarrow{CP_I})$  in which all grasps selected by a participant onto an object were set to have 0

823 penalty, and all grasps that had not been selected were set to have a penalty of 1. Then, we fit  
824 the function:

$$825 \quad P_{O,fit}(\overrightarrow{CP_T}, \overrightarrow{CP_I}) = \sqrt{\sum_i w_i * P_i(\overrightarrow{CP_T}, \overrightarrow{CP_I})^2}$$

826 to the human grasp penalty function. More specifically, we employed a nonlinear least-squares  
827 solver to search for the set of weights  $w_i = [w_{FC}; w_T; w_{NGA}; w_{OGA}; w_{RT}]$  that minimized the  
828 function:

$$829 \quad F(w_i) = \sqrt{R(\overrightarrow{CP_T}, \overrightarrow{CP_I}) * \left[ \sqrt{\sum_i w_i * P_i(\overrightarrow{CP_T}, \overrightarrow{CP_I})^2} - P_H(\overrightarrow{CP_T}, \overrightarrow{CP_I}) \right]}$$

830 i.e. we searched for the set of weights for which  $P_{O,fit}$  best approximated the human grasp  
831 penalty function  $P_H$ . The solver employed the trust-region-reflective algorithm; we set the lower  
832 and upper bounds of the weights to be 0 and 1, and 0.2 as the starting value for all weights. The  
833 number of non-selected grasps with  $P_H(\overrightarrow{CP_T}, \overrightarrow{CP_I}) = 1$  vastly outnumbered the few selected  
834 grasps for which  $P_H(\overrightarrow{CP_T}, \overrightarrow{CP_I}) = 0$ . To avoid overfitting the model to the regions of the grasp  
835 space where  $P_H(\overrightarrow{CP_T}, \overrightarrow{CP_I}) = 1$ , we designed  $R(\overrightarrow{CP_T}, \overrightarrow{CP_I})$  as a regularization function which  
836 served to give equal importance to high and low penalty grasps in the human grasp penalty  
837 function. Thus, for grasps where  $P_H(\overrightarrow{CP_T}, \overrightarrow{CP_I}) = 0$ ,  $R(\overrightarrow{CP_T}, \overrightarrow{CP_I})$  was equal to the number of  
838 times the participant had selected that specific grasp. For grasps where  $P_H(\overrightarrow{CP_T}, \overrightarrow{CP_I}) = 1$   
839 instead,  $R(\overrightarrow{CP_T}, \overrightarrow{CP_I}) = \frac{N_{G,selected}}{N_{G,non-selected}}$ ; where  $N_{G,selected}$  was the total number of grasps performed  
840 by the participant onto the object, and  $N_{G,non-selected}$  was the total number of non-selected  
841 grasps within the grasp manifold. This way for both selected and non-selected grasp regions,  
842 the sum of  $R(\overrightarrow{CP_T}, \overrightarrow{CP_I})$  was  $N_{G,selected}$ , and both regions of grasp space were accounted for  
843 equally during the fitting.

844 **Predicting Grasps.** The minima of both the equally weighted (non-fitted) and the fitted overall  
845 grasp penalty functions represent the set of grasps predicted to be optimal under the weighted  
846 linear combination of the five penalty functions included in our normative model. To visualize  
847 these predicted optimal grasps, we sampled them from the minima of the penalty functions.  
848 First, we removed all grasps with penalty values greater than the lower 0.1th percentile. This  
849 percentile value was selected to approximately match the proportion of grasp space actually  
850 covered by human grasps. The remaining grasps were therefore all optimal or near-optimal.  
851 From this subset, we then randomly selected (with replacement) a number of grasps equal to  
852 the number of grasps executed by the human participants. The probability with which any one  
853 grasp was selected was set to be 1 minus the grasp penalty, thus grasps with zero penalty had  
854 the highest probability of being selected. These sampled grasps can then be projected back  
855 onto the objects for visualization purposes (Figure 12a, 13a), or they can be directly compared  
856 to human grasps using the grasp similarity metric described above (Figures 12b,c, 13c).

857

858 **Data availability.** Data and analysis scripts as well as supplementary figures will be made  
859 available from the Zenodo database (doi upon acceptance).

860

861 **Acknowledgments.** The authors thank Dr. Karl Gegenfurtner for insightful feedback. This  
862 research was supported by the DFG (IRTG-1901: 'The Brain in Action' and SFB-TRR-135:  
863 'Cardinal Mechanisms of Perception'), and an ERC Consolidator Award (ERC-2015-CoG-  
864 682859: 'SHAPE'). Guido Maiello was supported by a Marie-Skłodowska-Curie Actions  
865 Individual Fellowship (H2020-MSCA-IF-2017: 'VisualGrasping' Project ID: 793660).

866

## 867 **References**

- 868 1. S. Levine, P. Pastor, A. Krizhevsky, J. Ibarz, D. Quillen, Learning hand-eye coordination for robotic  
869 grasping with deep learning and large-scale data collection. *The International Journal of Robotics  
870 Research* **37**, 421–436 (2018).

- 871 2. J. B. J. Smeets, E. Brenner, A New View on Grasping. *Motor Control* **3**, 237–271 (1999).
- 872 3. D. A. Rosenbaum, R. J. G. Meulenbroek, J. Vaughan, C. Elsinger, Approaching Grasping from  
873 Different Perspectives. *Motor Control* **3**, 289–297 (1999).
- 874 4. D. A. Rosenbaum, R. G. J. Meulenbroek, J. Vaughan, C. Jansen, Coordination of reaching and  
875 grasping by capitalizing on obstacle avoidance and other constraints. *Experimental Brain Research*  
876 **128**, 92–100 (1999).
- 877 5. J. Smeets, E. Brenner, Independent movements of the digits in grasping. *Experimental Brain*  
878 *Research* **139**, 92–100 (2001).
- 879 6. V. N. Christopoulos, P. R. Schrater, Grasping Objects with Environmentally Induced Position  
880 Uncertainty. *PLoS Computational Biology* **5**, e1000538 (2009).
- 881 7. S. Karok, R. Newport, The continuous updating of grasp in response to dynamic changes in object  
882 size, hand size and distractor proximity. *Neuropsychologia* **48**, 3891–3900 (2010).
- 883 8. O. Eloka, V. H. Franz, Effects of object shape on the visual guidance of action. *Vision Research* **51**,  
884 925–931 (2011).
- 885 9. R. Volcic, F. Domini, The visibility of contact points influences grasping movements. *Experimental*  
886 *Brain Research* **232**, 2997–3005 (2014).
- 887 10. R. Volcic, F. Domini, On-line visual control of grasping movements. *Experimental Brain Research*  
888 **234**, 2165–2177 (2016).
- 889 11. C. Bozzacchi, R. Volcic, F. Domini, Grasping in absence of feedback: systematic biases endure  
890 extensive training. *Experimental Brain Research* **234**, 255–265 (2016).
- 891 12. R. S. Johansson, G. Westling, Roles of glabrous skin receptors and sensorimotor memory in  
892 automatic control of precision grip when lifting rougher or more slippery objects. *Exp Brain Res* **56**,  
893 550–564 (1984).
- 894 13. A. W. Goodwin, P. Jenmalm, R. S. Johansson, Control of grip force when tilting objects: effect of  
895 curvature of grasped surfaces and applied tangential torque. *J. Neurosci.* **18**, 10724–10734 (1998).
- 896 14. P. Jenmalm, R. S. Johansson, Visual and somatosensory information about object shape control  
897 manipulative fingertip forces. *J. Neurosci.* **17**, 4486–4499 (1997).
- 898 15. U. Kleinholdermann, V. H. Franz, K. R. Gegenfurtner, Human grasp point selection. *Journal of Vision*  
899 **13**, 23–23 (2013).
- 900 16. R. Gilster, C. Hesse, H. Deubel, Contact points during multidigit grasping of geometric objects.  
901 *Experimental Brain Research* **217**, 137–151 (2012).
- 902 17. V.-D. Nguyen, Constructing Force- Closure Grasps. *The International Journal of Robotics Research*  
903 **7**, 3–16 (1988).

- 904 18. M. A. Goodale, *et al.*, Separate neural pathways for the visual analysis of object shape in  
905 perception and prehension. *Current Biology* **4**, 604–610 (1994).
- 906 19. S. J. Lederman, A. M. Wing, Perceptual judgement, grasp point selection and object symmetry.  
907 *Experimental Brain Research* **152**, 156–165 (2003).
- 908 20. D. Eastough, M. G. Edwards, Movement kinematics in prehension are affected by grasping objects  
909 of different mass. *Experimental Brain Research* **176**, 193–198 (2006).
- 910 21. J. Lukos, C. Ansuini, M. Santello, Choice of Contact Points during Multidigit Grasping: Effect of  
911 Predictability of Object Center of Mass Location. *Journal of Neuroscience* **27**, 3894–3903 (2007).
- 912 22. V. C. Paulun, K. R. Gegenfurtner, M. A. Goodale, R. W. Fleming, Effects of material properties and  
913 object orientation on precision grip kinematics. *Experimental Brain Research* **234**, 2253–2265  
914 (2016).
- 915 23. A. Roby-Brami, N. Bennis, M. Mokhtari, P. Baraduc, Hand orientation for grasping depends on the  
916 direction of the reaching movement. *Brain Research* **869**, 121–129 (2000).
- 917 24. W. D. Schot, E. Brenner, J. B. J. Smeets, Posture of the arm when grasping spheres to place them  
918 elsewhere. *Experimental Brain Research* **204**, 163–171 (2010).
- 919 25. D. Voudouris, E. Brenner, W. D. Schot, J. B. J. Smeets, Does planning a different trajectory influence  
920 the choice of grasping points? *Experimental Brain Research* **206**, 15–24 (2010).
- 921 26. P. Cesari, K. M. Newell, The scaling of human grip configurations. *Journal of Experimental*  
922 *Psychology: Human Perception and Performance* **25**, 927–935 (1999).
- 923 27. H. J. Huang, R. Kram, A. A. Ahmed, Reduction of Metabolic Cost during Motor Learning of Arm  
924 Reaching Dynamics. *Journal of Neuroscience* **32**, 2182–2190 (2012).
- 925 28. V. C. Paulun, U. Kleinholdermann, K. R. Gegenfurtner, J. B. J. Smeets, E. Brenner, Center or side:  
926 biases in selecting grasp points on small bars. *Experimental Brain Research* **232**, 2061–2072 (2014).
- 927 29. C. Bozzacchi, E. Brenner, J. B. Smeets, R. Volcic, F. Domini, How removing visual information affects  
928 grasping movements. *Experimental Brain Research* **236**, 985–995 (2018).
- 929 30. G. Maiello, V. C. Paulun, L. K. Klein, R. W. Fleming, Object Visibility, Not Energy Expenditure,  
930 Accounts For Spatial Biases in Human Grasp Selection. *i-Perception* **10**, 204166951982760 (2019).
- 931 31. R. Volcic, A. M. L. Kappers, Allocentric and egocentric reference frames in the processing of three-  
932 dimensional haptic space. *Experimental Brain Research* **188**, 199–213 (2008).
- 933 32. L. Desanghere, J. J. Marotta, The influence of object shape and center of mass on grasp and gaze.  
934 *Frontiers in Psychology* **6** (2015).
- 935 33. C. Glowania, L. C. J. van Dam, E. Brenner, M. A. Plaisier, Smooth at one end and rough at the other:  
936 influence of object texture on grasping behaviour. *Experimental Brain Research* **235**, 2821–2827  
937 (2017).



- 938 34. R. H. Cuijpers, J. B. J. Smeets, E. Brenner, On the Relation Between Object Shape and Grasping  
939 Kinematics. *Journal of Neurophysiology* **91**, 2598–2606 (2004).
- 940 35. R. H. Cuijpers, E. Brenner, J. B. J. Smeets, Grasping reveals visual misjudgements of shape.  
941 *Experimental Brain Research* **175**, 32–44 (2006).
- 942 36. L. F. Schettino, S. V. Adamovich, H. Poizner, Effects of object shape and visual feedback on hand  
943 configuration during grasping. *Experimental Brain Research* **151**, 158–166 (2003).
- 944 37. Z. Chen, J. A. Saunders, Online processing of shape information for control of grasping.  
945 *Experimental Brain Research* **233**, 3109–3124 (2015).
- 946 38. P. Mamassian, Prehension of objects oriented in three-dimensional space: *Experimental Brain*  
947 *Research* **114**, 235–245 (1997).
- 948 39. V. C. Paulun, G. Buckingham, M. A. Goodale, R. W. Fleming, The material-weight illusion disappears  
949 or inverts in objects made of two materials. *Journal of Neurophysiology* **121**, 996–1010 (2019).
- 950 40. D. A. Rosenbaum, *et al.*, “Constraints for action selection: Overhand versus underhand grips.” in  
951 *Attention and Performance 13: Motor Representation and Control.*, (Lawrence Erlbaum Associates,  
952 Inc, 1990), pp. 321–342.
- 953 41. M. W. Short, J. H. Cauraugh, Precision hypothesis and the end-state comfort effect. *Acta*  
954 *Psychologica* **100**, 243–252 (1999).
- 955 42. C. M. Lee Hughes, C. Seegelke, T. Schack, The Influence of Initial and Final Precision on Motor  
956 Planning: Individual Differences in End-State Comfort During Unimanual Grasping and Placing.  
957 *Journal of Motor Behavior* **44**, 195–201 (2012).
- 958 43. D. Voudouris, J. B. J. Smeets, E. Brenner, Do obstacles affect the selection of grasping points?  
959 *Human Movement Science* **31**, 1090–1102 (2012).
- 960 44. G. Cadoret, A. M. Smith, Friction, not texture, dictates grip forces used during object manipulation.  
961 *J. Neurophysiol.* **75**, 1963–1969 (1996).
- 962 45. M. K. Burstedt, J. R. Flanagan, R. S. Johansson, Control of grasp stability in humans under different  
963 frictional conditions during multidigit manipulation. *J. Neurophysiol.* **82**, 2393–2405 (1999).
- 964 46. N. K. Veijgen, E. van der Heide, M. A. Masen, A multivariable model for predicting the frictional  
965 behaviour and hydration of the human skin. *Skin Res Technol* **19**, 330–338 (2013).
- 966 47. U. Castiello, The neuroscience of grasping. *Nature Reviews Neuroscience* **6**, 726–736 (2005).
- 967 48. U. Castiello, C. Begliomini, The Cortical Control of Visually Guided Grasping. *The Neuroscientist* **14**,  
968 157–170 (2008).
- 969 49. P. Janssen, H. Scherberger, Visual Guidance in Control of Grasping. *Annual Review of Neuroscience*  
970 **38**, 69–86 (2015).

- 971 50. T. Theys, P. Pani, J. van Loon, J. Goffin, P. Janssen, Selectivity for Three-Dimensional Shape and  
972 Grasping-Related Activity in the Macaque Ventral Premotor Cortex. *Journal of Neuroscience* **32**,  
973 12038–12050 (2012).
- 974 51. A. Murata, *et al.*, Object Representation in the Ventral Premotor Cortex (Area F5) of the Monkey.  
975 *Journal of Neurophysiology* **78**, 2226–2230 (1997).
- 976 52. V. Raos, M.-A. Umiltá, A. Murata, L. Fogassi, V. Gallese, Functional Properties of Grasping-Related  
977 Neurons in the Ventral Premotor Area F5 of the Macaque Monkey. *Journal of Neurophysiology* **95**,  
978 709–729 (2006).
- 979 53. V. Raos, M.-A. Umiltá, V. Gallese, L. Fogassi, Functional Properties of Grasping-Related Neurons in  
980 the Dorsal Premotor Area F2 of the Macaque Monkey. *Journal of Neurophysiology* **92**, 1990–2002  
981 (2004).
- 982 54. A. Murata, V. Gallese, G. Luppino, M. Kaseda, H. Sakata, Selectivity for the Shape, Size, and  
983 Orientation of Objects for Grasping in Neurons of Monkey Parietal Area AIP. *Journal of*  
984 *Neurophysiology* **83**, 2580–2601 (2000).
- 985 55. J. S. Cant, M. A. Goodale, Scratching Beneath the Surface: New Insights into the Functional  
986 Properties of the Lateral Occipital Area and Parahippocampal Place Area. *Journal of Neuroscience*  
987 **31**, 8248–8258 (2011).
- 988 56. C. Hiramatsu, N. Goda, H. Komatsu, Transformation from image-based to perceptual  
989 representation of materials along the human ventral visual pathway. *NeuroImage* **57**, 482–494  
990 (2011).
- 991 57. J. P. Gallivan, J. S. Cant, M. A. Goodale, J. R. Flanagan, Representation of Object Weight in Human  
992 Ventral Visual Cortex. *Current Biology* **24**, 1866–1873 (2014).
- 993 58. N. Goda, A. Tachibana, G. Okazawa, H. Komatsu, Representation of the Material Properties of  
994 Objects in the Visual Cortex of Nonhuman Primates. *Journal of Neuroscience* **34**, 2660–2673  
995 (2014).
- 996 59. N. Goda, I. Yokoi, A. Tachibana, T. Minamimoto, H. Komatsu, Crossmodal Association of Visual and  
997 Haptic Material Properties of Objects in the Monkey Ventral Visual Cortex. *Current Biology* **26**,  
998 928–934 (2016).
- 999 60. E. Borra, *et al.*, Cortical Connections of the Macaque Anterior Intraparietal (AIP) Area. *Cerebral*  
1000 *Cortex* **18**, 1094–1111 (2008).
- 1001 61. H. Sakata, M. Taira, A. Murata, S. Mine, Neural Mechanisms of Visual Guidance of Hand Action in  
1002 the Parietal Cortex of the Monkey. *Cerebral Cortex* **5**, 429–438 (1995).
- 1003 62. M. Jeannerod, M. A. Arbib, G. Rizzolatti, H. Sakata, Grasping objects: the cortical mechanisms of  
1004 visuomotor transformation. *Trends in Neurosciences* **18**, 314–320 (1995).

- 1005 63. S. Srivastava, G. A. Orban, P. A. De Maziere, P. Janssen, A Distinct Representation of Three-  
1006 Dimensional Shape in Macaque Anterior Intraparietal Area: Fast, Metric, and Coarse. *Journal of*  
1007 *Neuroscience* **29**, 10613–10626 (2009).
- 1008 64. M. Davare, J. C. Rothwell, R. N. Lemon, Causal Connectivity between the Human Anterior  
1009 Intraparietal Area and Premotor Cortex during Grasp. *Current Biology* **20**, 176–181 (2010).
- 1010 65. T. Theys, M. C. Romero, J. van Loon, P. Janssen, Shape representations in the primate dorsal visual  
1011 stream. *Frontiers in Computational Neuroscience* **9** (2015).
- 1012 66. V. H. Franz, Optotrak Toolbox. *The Optotrak Toolbox: Control your Optotrak from within Matlab*  
1013 (2004).
- 1014 67. P. Milgram, A spectacle-mounted liquid-crystal tachistoscope. *Behavior Research Methods,*  
1015 *Instruments, & Computers* **19**, 449–456 (1987).
- 1016 68. Z. Derzsi, R. Volcic, MOTOM toolbox: MOtion Tracking via Optotrak and Matlab. *Journal of*  
1017 *Neuroscience Methods* **308**, 129–134 (2018).
- 1018 69. W. D. Schot, E. Brenner, J. B. J. Smeets, Robust movement segmentation by combining multiple  
1019 sources of information. *Journal of Neuroscience Methods* **187**, 147–155 (2010).

1020

1021

1022 **Supporting information**

1023

1024 **S1 Figure. Human and model grasping patterns for Experiments 1 and 2.** Grasping  
1025 patterns from human participants (left), unfitted model (middle), and fitted model (right). (a)  
1026 Grasping patterns on wooden objects from Experiment 1. (b) Grasping patterns on mixed  
1027 material objects from Experiment 2.

1028

1029 **S2 Figure. Pattern of empirical results from Experiments 1 and 2 recreated from**  
1030 **simulating grasps from the fitted model.** Panels are the same as in Figures 3, 4 and 5 of the  
1031 main manuscript, except that the data are simulated from the model. The grasp trajectories in  
1032 panel (4b) are from the human data, to highlight how the model correctly reproduces the biases  
1033 in human grasping patterns. Panel 5b is omitted since the model cannot learn to refine CoM  
1034 estimates.

1035

1036 **S3 Figure. Location of the center of mass for the stimuli employed in Experiments 1 and**  
1037 **2.** The center of mass of the light wooden objects from Experiment 1 is shown as a black dot.  
1038 The centers of mass for the heavy alternate and bipartite wood/brass objects from Experiment 2  
1039 are shown as red dots and squares respectively.
